# Supplementary material for: Fractionation, Stability, and Isolate-Specificity of QTL for Resistance to Phytophthora infestans in Cultivated Tomato (Solanum lycopersicum)
Source: PubMed Central journal article supplement (PMC3464107; doi:10.1534/g3.112.003459), 2012-10-01
Supplement: supp_2.10.1145_003459SI.pdf [file supp_2.10.1145_003459SI.pdf]

**Files S1 and S2**

**Supporting Data**

Available for download as Excel files at <http://www.g3journal.org/lookup/suppl/doi:10.1534/g3.112.003459/-/DC1>.

**Table S1 Markers used for chromosome 5 and chromosome 11 introgressed regions**

All markers are PCR-based and co-dominant unless otherwise noted. Position refers to the position in cM on the genetic maps of the introgressed regions from *S. habrochaites* (not the position on the entire chromosome). In the table, A and B refer to the band sizes for the *S. lycopersicum* and *S. habrochaites* alleles, respectively.

| Chr  | Marker                            | Position | Forward Primer              | Reverse Primer              | Tm <sup>a</sup> | Mg                | Restriction    | Band sizes (A, B)       |
|------|-----------------------------------|----------|-----------------------------|-----------------------------|-----------------|-------------------|----------------|-------------------------|
|      |                                   |          |                             |                             |                 | conc <sup>b</sup> | enzyme         |                         |
| Chr5 | <b>TG358</b>                      | 0.0      | CAACTTTTCCAGGTTCAATTTCTC    | ACACCTACATGCTACTAAGGGGTC    | 53              | 2.0               | <i>HhaI</i>    | 250, 300                |
|      | <b>At1g10500</b>                  | 0.0      | ACGATTCAATCATCGAGTACAATGG   | AGCAGTAAACGATTTTCCACAACCAC  | 55              | 1.5               | <i>HaeIII</i>  | 1000, 800               |
|      | <b>T0536</b>                      | 0.3      | GAGTTCGTAAGACTGATGG         | ATTTCACTTATGCAGGTACG        | 55              | 1.5               | <i>MnII</i>    | 300, 410                |
|      | <b>cLEX-13-G5</b>                 | 1.5      | GCAGCATTTAGGCTCAGAGG        | TTCTCAGTGGATCGTGATGG        | 55              | 1.5               | <i>HinfI</i>   | 320, 400                |
|      | <b>U221402</b>                    | 1.8      | AAGCCTCCTTGACAAATGCATATAG   | AGATATAGCTACAGTGGCAGCTTCATC | 55              | 1.5               | <i>DdeI</i>    | 450, 650                |
|      | <b>At3g55800</b>                  | 2.7      | TTTGAATCAAGCTCATTATTTGG     | AGCTGTTCTCCACAAGAAGCTG      | 55              | 1.5               | <i>DpnII</i>   | 200, 320                |
|      | <b>At2g39950 F2/R2</b>            | 3.0      | TTGGCTGAGTTAACTGGAAT        | AATGTGGAGTCCAAGTGGAG        | 55              | 1.5               | <i>DpnII</i>   | 170 and 180, 370        |
|      | <b>TG23</b>                       | 5.5      | ATGAACTTCCCTTAAGTATCTG      | CCTTATCCATAGGTTCCAAAGG      | 57              | 2.0               | <i>Asel</i>    | 650, 500                |
|      | <b>At3g17210 F/R3<sup>c</sup></b> | 5.9      | AGCACATTTTGCTAGCAAAGTTCAAAG | CAACATGAACAGGATGAGC         | 55              | 1.5               | <i>DdeI</i>    | A 450, B/h 600          |
|      | <b>At3g17210 F2/R<sup>c</sup></b> | 5.9      | GAGTTGTGAAGCACATTTTG        | TGATGAAGATTTTCTATGCTCACATCC | 55              | 1.5               | <i>DdeI</i>    | A/h 380 and 500, B null |
|      | <b>At5g49510</b>                  | 6.3      | AAGCCAGTTTAGAGTTCCTGTGG     | TTCTTTGGGAGTGGTAGCTTGTCG    | 59              | 1.5               | <i>DdeI</i>    | 310, 250                |
|      | <b>TG60</b>                       | 7.6      | GGTTTGTGGTAGGTTTCATCC       | TTTTTCTTTGTGAAATGTGC        | 51              | 1.5               | <i>Tsp509I</i> | 250, 120 and 150        |
|      | <b>At2g31970</b>                  | 7.7      | TGCGAGGGAGGTGTAGTGCTGG      | AACAGAGCTGCAGCAAGACTCTCAC   | 55              | 1.5               | <i>HpaII</i>   | 160 and 250, 400        |
|      | <b>At4g12590</b>                  | 9.4      | ACATGGCTATGGATATGATGAAGAAG  | ACCCAGAGAAGAAGAAGTTGACCC    | 55              | 1.5               | <i>HinfI</i>   | 120, 170                |
|      | <b>T1777</b>                      | 9.5      | AATTCTCCAGGAATTCACC         | TCCAACCATTGAATATTTCC        | 55              | 1.5               | <i>HaeIII</i>  | 700, 800                |
|      | <b>T1541</b>                      | 9.9      | CTCAACTATGGGTGGTGACAATAC    | CTTTAGGTTTTTCGGGCTCTTAG     | 55              | 1.5               | <i>HinfI</i>   | 300, 350 and 450        |
|      | <b>TG69</b>                       | 12.0     | TCTTTCTTTGAACTTTTGG         | CAATGAGGGAAGTTCTTGG         | 51              | 1.5               | <i>FokI</i>    | 300, 350                |
|      | <b>At3g55360<sup>d</sup></b>      | 12.3     | TTTAGTGGTTACAGTAGCGGC       | TGCCTCTGCAGATCAGCAAC        | 55              | 2.0               | --             | 750, 400                |

Table S1, cont.

| Chr   | Marker             | Position | Forward Primer            | Reverse Primer              | Tm <sup>a</sup> | Mg                | Restriction   | band sizes (A, B) |
|-------|--------------------|----------|---------------------------|-----------------------------|-----------------|-------------------|---------------|-------------------|
|       |                    |          |                           |                             |                 | conc <sup>b</sup> | enzyme        |                   |
| Chr11 | TG194              | 0.0      | CAGATGAAAGAAAAGCCAAAAGAG  | AATGCTCAGAAGGGAAACATAAAG    | 57              | 2.0               | <i>MnII</i>   | 200, 400          |
|       | T0408              | 0.7      | ATCAGGAACTAGCTCACAGG      | AATCTTCCAGGCTTATTGG         | 57              | 2.0               | <i>MnII</i>   | 480, 290 and 300  |
|       | SSR67 <sup>e</sup> | 0.7      | GCACGAGACCAAGCAGATTA      | GGGCCTTCTCCAGTAGAC          | 61              | 1.5               | <i>Ddel</i>   | 850, 390 and 650  |
|       | J1                 | 1.4      | CATCCACCGCTATGTACGTG      | CACCACTCACCCATCTTGTG        | 60              | 1.5               | <i>RsaI</i>   | 250, 300 and 470  |
|       | TG523              | 1.5      | TGCAATGAAGATAAAAGACC      | GTGGATAACTCGTTAGTTTCG       | 53              | 1.5               | <i>DpnII</i>  | 350, 300          |
|       | At2g22570          | 1.5      | ACTGAAGAGTGAGATTCCGGTGGAG | TCTGTTCCAGTGATACAATGAGGAGG  | 55              | 1.5               | <i>HinfI</i>  | 190, 300          |
|       | At5g16710          | 3.0      | ACTTGATGAGCTGACAGCTTCAATG | AGCTTTGGTCCAAGCGACAAATC     | 55              | 1.5               | <i>HaellI</i> | 900, 1100         |
|       | U340899            | 3.4      | GTCCTTGAAGACTTTGATGC      | CCCACATTACCAAGATATGG        | 53              | 1.5               | <i>Ddel</i>   | 450, 300          |
|       | CT182              | 4.3      | AGTCATTTCAATTTGATTGTAGC   | AGGTGGCCAACCTCTTAGG         | 53              | 1.5               | <i>Asel</i>   | 500, 370          |
|       | At4g22260          | 4.4      | TCCTCTAACGGTCTAGAGAAATGGG | AGGAACTCTTGCAATTGTTCCAGAAC  | 55              | 1.5               | <i>HinfI</i>  | 300, 420          |
|       | At3g02870          | 4.8      | TGAAGCTGCTAAAAAGCTGGAGAG  | ACAAAAGGGAACCCGTGCACAAAG    | 55              | 1.5               | <i>HinfI</i>  | 950, 800          |
|       | At1g21690          | 5.5      | ATGCAGAGCTCTCAGCCATGGG    | ACCTACAGCAACAGCAGCAAAGTTC   | 57              | 1.5               | <i>Ddel</i>   | 400, 280          |
|       | At1g44446          | 5.5      | AGATCTTGACACGCACCTTTCAC   | TCCTTGACAGCCAGATGCAGGAGTC   | 55              | 1.5               | <i>Ddel</i>   | 200, 350          |
|       | At1g44790          | 5.6      | TCGGTTTTATCAAAGGCTATCGTC  | TGTTACTGTTCTACCTGGGAATTCTGG | 55              | 1.5               | <i>Asel</i>   | 130 and 160, 290  |
|       | cLEX-4-g10         | 6.9      | TCCTCCAGAATTATCTGAGC      | ACCAAGCTTTCTTAAACC          | 51              | 1.5               | <i>HinfI</i>  | 450, 230 and 260  |
|       | cLEB-7-LI          | 7.5      | GAGATCTGCTCTTCTCTTGC      | ACAGCTCTGTTGATTCTTCC        | 59              | 1.5               | <i>RsaI</i>   | 850, 700          |
|       | TG147              | 7.6      | ACTGAGGTTAATGATGATGC      | GATTAATTGGGAGTATTTGTCC      | 51              | 1.5               | <i>RsaI</i>   | 180, 400          |
|       | At4g10050          | 8.4      | ATCACCTTCTGCCTTTTCTTC     | ATCTGGGATCTGAATGTCATCCTC    | 55              | 1.5               | <i>HinfI</i>  | 500, 350          |
|       | At2g14260          | 8.4      | AGGATCTATACCCCTCTATAGAGCC | TTATTGGGTGAAGTCCCACCTCC     | 55              | 1.5               | <i>Ddel</i>   | 550, 500          |
|       | At5g04590          | 9.0      | ATCACCACAGTCCTTGACAGGG    | AGGACAAAGTGGAAAAGCTGGG      | 58              | 1.5               | <i>Ddel</i>   | 750, 250          |
|       | TG400              | 9.4      | GCTAATTGAAGTCAAAGAGCACAC  | ACCTGTTGTTGCTTGGTTATATG     | 55              | 2.0               | <i>HaellI</i> | 275, 350          |

<sup>a</sup> Annealing temperature in Celsius.

<sup>b</sup> Mg concentration in mM.

<sup>c</sup> Marker is dominant.

<sup>d</sup> SCAR marker which does not require restriction enzyme digest for polymorphic bands.

<sup>e</sup> To detect a polymorphism between parental genotypes, a restriction enzyme digest of SSR67 was required.

**Table S2 Genotypes and means separation of sub-NILs for chr5**

Means separation is given for all 09FD\_120, GC\_120, and 10FD\_83 traits. Line Name indicates the name of each control or sub-NIL. The four digit designation for each sub-NIL is preceded by "08GH". The "2010" column indicates which lines were included in the 2010 field experiment. In the Genotype section, "A" indicates homozygosity for the *S. lycopersicum* allele, "B" indicates homozygosity for the *S. habrochaites* allele, and "h" indicates heterozygosity. Trait names are given according to dataset, location or isolate, and trait evaluated (see Materials & Methods). The lowest mean AUDPC for each trait is in bold and underlined.

| Line Name | Genotype |      | Means Separation |         |       |          |         |         |         |      |         |         |      |         |         |        |       |      |         |                    |                    |                           |                          |                         |                         |                         |                    |
|-----------|----------|------|------------------|---------|-------|----------|---------|---------|---------|------|---------|---------|------|---------|---------|--------|-------|------|---------|--------------------|--------------------|---------------------------|--------------------------|-------------------------|-------------------------|-------------------------|--------------------|
|           | ID       | 2010 | TG358            | At10500 | T0536 | cLEX13G5 | U221402 | At55800 | At39950 | TG23 | At17210 | At49510 | TG60 | At31970 | At12590 | T11777 | T1541 | TG69 | At55360 | 09FD_120 Loc1 LEAF | 09FD_120 Loc2 LEAF | 10FD-early_83 Loc1&2 LEAF | 10FD-late_83 Loc1&2 LEAF | GC_120 p7629 LEAF       | GC_120 p10353 LEAF      | GC_120 Sal10 LEAF       |                    |
| Hyp45-A   | 121      | x    | A                | A       | A     | A        | A       | A       | A       | A    | A       | A       | A    | A       | A       | A      | A     | A    | A       | A                  | 6.02 <sup>ab</sup> | 4.70 <sup>a-e</sup>       | 5.33 <sup>ab</sup>       | 6.71 <sup>ab</sup>      | 3.71 <sup>a</sup>       | 4.51 <sup>a</sup>       | 4.30 <sup>a</sup>  |
| Hyp45-B   | 122      |      | A                | A       | A     | A        | A       | A       | A       | A    | A       | A       | A    | A       | A       | A      | A     | A    | A       | A                  | 6.17 <sup>ab</sup> | 5.36 <sup>ab</sup>        | --                       | --                      | --                      | --                      | --                 |
| E6203-A   | 123      | x    | A                | A       | A     | A        | A       | A       | A       | A    | A       | A       | A    | A       | A       | A      | A     | A    | A       | A                  | 6.24 <sup>ab</sup> | 4.35 <sup>a-e</sup>       | 5.26 <sup>a-c</sup>      | 6.62 <sup>a-e</sup>     | --                      | --                      | --                 |
| E6203-B   | 124      | x    | A                | A       | A     | A        | A       | A       | A       | A    | A       | A       | A    | A       | A       | A      | A     | A    | A       | A                  | 6.21 <sup>ab</sup> | 4.62 <sup>a-e</sup>       | 5.05 <sup>a-f</sup>      | 6.52 <sup>a-g</sup>     | 3.36 <sup>ab</sup>      | 4.22 <sup>a</sup>       | 4.06 <sup>ab</sup> |
| E6203-C   | 129      | x    | A                | A       | A     | A        | A       | A       | A       | A    | A       | A       | A    | A       | A       | A      | A     | A    | A       | A                  | --                 | --                        | 4.96 <sup>a-i</sup>      | 6.44 <sup>a-h</sup>     | --                      | --                      | --                 |
| E6203-D   | 130      | x    | A                | A       | A     | A        | A       | A       | A       | A    | A       | A       | A    | A       | A       | A      | A     | A    | A       | A                  | --                 | --                        | 5.03 <sup>a-g</sup>      | 6.32 <sup>a-h</sup>     | --                      | --                      | --                 |
| LB5-NIL-A | 125      | x    | B                | B       | B     | B        | B       | B       | B       | B    | B       | B       | B    | B       | B       | B      | B     | B    | B       | B                  | 5.74 <sup>ab</sup> | 4.16 <sup>a-e</sup>       | 4.35 <sup>h-l</sup>      | <b>5.78<sup>h</sup></b> | <b>2.42<sup>c</sup></b> | <b>3.02<sup>b</sup></b> | 3.33 <sup>b</sup>  |
| LB5-NIL-B | 127      | x    | B                | B       | B     | B        | B       | B       | B       | B    | B       | B       | B    | B       | B       | B      | B     | B    | B       | B                  | --                 | --                        | <b>4.20<sup>l</sup></b>  | 5.89 <sup>f-h</sup>     | --                      | --                      | --                 |
| 7187      | 102      |      | B                | B       | A     | A        | A       | A       | A       | A    | A       | A       | A    | A       | A       | A      | A     | A    | A       | A                  | 5.43 <sup>ab</sup> | 3.38 <sup>c-e</sup>       | --                       | --                      | 3.40 <sup>ab</sup>      | 4.14 <sup>ab</sup>      | 3.16 <sup>ab</sup> |
| 7214      | 103      | x    | B                | B       | A     | A        | A       | A       | A       | A    | A       | A       | A    | A       | A       | A      | A     | A    | A       | A                  | 5.43 <sup>ab</sup> | 3.47 <sup>c-e</sup>       | 4.65 <sup>c-l</sup>      | 6.52 <sup>a-g</sup>     | 2.92 <sup>a-c</sup>     | 3.93 <sup>ab</sup>      | 3.57 <sup>ab</sup> |
| 5455      | 52       | x    | B                | B       | B     | A        | A       | A       | A       | A    | A       | A       | A    | A       | A       | A      | A     | A    | A       | A                  | 5.55 <sup>ab</sup> | 4.61 <sup>a-e</sup>       | 4.91 <sup>a-j</sup>      | 6.06 <sup>b-h</sup>     | 3.70 <sup>ab</sup>      | 4.12 <sup>ab</sup>      | 4.20 <sup>ab</sup> |
| 5470      | 53       | x    | B                | B       | B     | A        | A       | A       | A       | A    | A       | A       | A    | A       | A       | A      | A     | A    | A       | A                  | 6.38 <sup>ab</sup> | 4.12 <sup>a-e</sup>       | 4.59 <sup>d-l</sup>      | 5.94 <sup>d-h</sup>     | 3.40 <sup>ab</sup>      | 4.33 <sup>ab</sup>      | 4.72 <sup>ab</sup> |
| 7127      | 100      | x    | B                | B       | B     | A        | A       | A       | A       | A    | A       | A       | A    | A       | A       | A      | A     | A    | A       | A                  | 5.93 <sup>ab</sup> | 4.48 <sup>a-e</sup>       | 4.50 <sup>e-l</sup>      | 6.06 <sup>b-h</sup>     | 3.43 <sup>ab</sup>      | 3.79 <sup>ab</sup>      | 3.44 <sup>ab</sup> |

Table S2, cont.

| Line Name | Genotype |             | Means Separation |         |       |          |         |         |         |      |         |         |      |         |         |       |       |      |         |                    |                    |                           |                          |                     |                     |                    |                    |
|-----------|----------|-------------|------------------|---------|-------|----------|---------|---------|---------|------|---------|---------|------|---------|---------|-------|-------|------|---------|--------------------|--------------------|---------------------------|--------------------------|---------------------|---------------------|--------------------|--------------------|
|           | 2010     | Genotype ID | TG358            | At10500 | Tn536 | CLEX13G5 | U221402 | At55800 | At39950 | TG23 | At17210 | At49510 | TG60 | At31970 | At12590 | T1777 | T1541 | TG69 | At55360 | 09FD_120 Loc1 LEAF | 09FD_120 Loc2 LEAF | 10FD-early_83 Loc1&2 LEAF | 10FD-late_83 Loc1&2 LEAF | GC_120 p7629 LEAF   | GC_120 p10353 LEAF  | GC_120 Sal10 LEAF  |                    |
| 7094      | 99       | x           | B                | B       | B     | B        | A       | A       | A       | A    | A       | A       | A    | A       | A       | A     | A     | A    | A       | A                  | 6.17 <sup>ab</sup> | 3.26 <sup>de</sup>        | 4.52 <sup>e-1</sup>      | 5.94 <sup>d-h</sup> | 3.32 <sup>a-c</sup> | 4.03 <sup>ab</sup> | 4.22 <sup>ab</sup> |
| 7226      | 104      |             | B                | B       | B     | B        | A       | A       | A       | A    | A       | A       | A    | A       | A       | A     | A     | A    | A       | A                  | 5.76 <sup>ab</sup> | 3.75 <sup>b-e</sup>       | --                       | --                  | 3.78 <sup>ab</sup>  | 4.21 <sup>ab</sup> | 4.30 <sup>ab</sup> |
| 6555      | 84       | x           | B                | B       | B     | B        | B       | A       | A       | A    | A       | A       | A    | A       | A       | A     | A     | A    | A       | A                  | 5.86 <sup>ab</sup> | 5.62 <sup>a</sup>         | 4.70 <sup>a-1</sup>      | 6.37 <sup>a-h</sup> | 3.05 <sup>a-c</sup> | 4.13 <sup>ab</sup> | 3.34 <sup>ab</sup> |
| 7444      | 106      |             | B                | B       | B     | B        | B       | A       | A       | A    | A       | A       | A    | A       | A       | A     | A     | A    | A       | A                  | 5.95 <sup>ab</sup> | 4.25 <sup>a-e</sup>       | --                       | --                  | 3.51 <sup>ab</sup>  | 4.23 <sup>ab</sup> | 4.27 <sup>ab</sup> |
| 7471      | 108      | x           | B                | B       | B     | B        | B       | B       | A       | A    | A       | A       | A    | A       | A       | A     | A     | A    | A       | A                  | 5.86 <sup>ab</sup> | <b>3.03<sup>e</sup></b>   | 5.01 <sup>a-g</sup>      | 6.57 <sup>a-f</sup> | 3.34 <sup>a-c</sup> | 3.81 <sup>ab</sup> | 4.12 <sup>ab</sup> |
| 5592      | 56       | x           | B                | B       | B     | B        | B       | B       | B       | A    | A       | A       | A    | A       | A       | A     | A     | A    | A       | A                  | 5.75 <sup>ab</sup> | 3.92 <sup>a-e</sup>       | 4.84 <sup>a-1</sup>      | 6.27 <sup>a-h</sup> | 3.35 <sup>a-c</sup> | 4.12 <sup>ab</sup> | 3.35 <sup>ab</sup> |
| 6215      | 72       | x           | B                | B       | B     | B        | B       | B       | B       | A    | A       | A       | A    | A       | A       | A     | A     | A    | A       | A                  | 6.05 <sup>ab</sup> | 3.75 <sup>b-e</sup>       | 4.62 <sup>c-1</sup>      | 6.71 <sup>ab</sup>  | 3.08 <sup>a-c</sup> | 3.37 <sup>ab</sup> | 4.08 <sup>ab</sup> |
| 6497      | 83       | x           | B                | B       | B     | B        | B       | B       | B       | A    | A       | A       | A    | A       | A       | A     | A     | A    | A       | A                  | 5.74 <sup>ab</sup> | 4.72 <sup>a-e</sup>       | 4.39 <sup>g-1</sup>      | 5.98 <sup>c-h</sup> | 3.19 <sup>a-c</sup> | 4.28 <sup>ab</sup> | 4.52 <sup>ab</sup> |
| 6979      | 98       | x           | B                | B       | B     | B        | B       | B       | B       | A    | A       | A       | A    | A       | A       | A     | A     | A    | A       | A                  | 5.86 <sup>ab</sup> | 4.44 <sup>a-e</sup>       | 4.80 <sup>a-1</sup>      | 6.68 <sup>a-c</sup> | 3.44 <sup>ab</sup>  | 3.66 <sup>ab</sup> | 3.87 <sup>ab</sup> |
| 5553      | 55       |             | B                | B       | B     | B        | B       | B       | B       | B    | A       | A       | A    | A       | A       | A     | A     | A    | A       | A                  | 5.64 <sup>ab</sup> | 4.46 <sup>a-e</sup>       | --                       | --                  | 3.38 <sup>ab</sup>  | 3.71 <sup>ab</sup> | 3.68 <sup>ab</sup> |
| 5873      | 65       | x           | B                | B       | B     | B        | B       | B       | B       | B    | A       | A       | A    | A       | A       | A     | A     | A    | A       | A                  | 5.69 <sup>ab</sup> | 3.99 <sup>a-e</sup>       | 4.72 <sup>a-1</sup>      | 6.30 <sup>a-h</sup> | 3.41 <sup>ab</sup>  | 3.80 <sup>ab</sup> | 4.08 <sup>ab</sup> |
| 6941      | 96       | x           | B                | B       | B     | B        | B       | B       | B       | B    | B       | A       | A    | A       | A       | A     | A     | A    | A       | A                  | 5.82 <sup>ab</sup> | 4.20 <sup>a-e</sup>       | 4.52 <sup>e-1</sup>      | 6.14 <sup>a-h</sup> | 2.55 <sup>bc</sup>  | 3.21 <sup>ab</sup> | 3.25 <sup>ab</sup> |
| 7459      | 107      | x           | B                | B       | B     | B        | B       | B       | B       | B    | B       | A       | A    | A       | A       | A     | A     | A    | A       | A                  | 5.71 <sup>ab</sup> | 4.39 <sup>a-e</sup>       | 4.76 <sup>a-1</sup>      | 6.65 <sup>a-d</sup> | 3.15 <sup>a-c</sup> | 3.65 <sup>ab</sup> | 3.55 <sup>ab</sup> |
| 6603      | 85       |             | B                | B       | B     | B        | B       | B       | B       | B    | B       | B       | A    | A       | A       | A     | A     | A    | A       | A                  | 5.76 <sup>ab</sup> | 3.51 <sup>c-e</sup>       | --                       | --                  | 3.35 <sup>ab</sup>  | 4.18 <sup>ab</sup> | 3.42 <sup>ab</sup> |
| 6947      | 97       | x           | B                | B       | B     | B        | B       | B       | B       | B    | B       | B       | A    | A       | A       | A     | A     | A    | A       | A                  | 5.55 <sup>ab</sup> | 3.72 <sup>b-e</sup>       | 4.71 <sup>a-1</sup>      | 6.33 <sup>a-h</sup> | 3.41 <sup>ab</sup>  | 3.70 <sup>ab</sup> | 3.11 <sup>ab</sup> |
| 6072      | 70       | x           | B                | B       | B     | B        | B       | B       | B       | B    | B       | B       | B    | A       | A       | A     | A     | A    | A       | A                  | 5.74 <sup>ab</sup> | 4.08 <sup>a-e</sup>       | 4.44 <sup>f-1</sup>      | 6.40 <sup>a-h</sup> | 3.42 <sup>ab</sup>  | 3.57 <sup>ab</sup> | 4.12 <sup>ab</sup> |
| 6927      | 95       | x           | B                | B       | B     | B        | B       | B       | B       | B    | B       | B       | B    | B       | A       | A     | A     | A    | A       | A                  | 5.86 <sup>ab</sup> | 4.22 <sup>a-e</sup>       | 4.83 <sup>a-1</sup>      | 6.55 <sup>a-f</sup> | 2.73 <sup>a-c</sup> | 3.84 <sup>ab</sup> | 4.12 <sup>ab</sup> |
| 7374      | 105      | x           | B                | B       | B     | B        | B       | B       | B       | B    | B       | B       | B    | B       | A       | A     | A     | A    | A       | A                  | 5.71 <sup>ab</sup> | 3.79 <sup>b-e</sup>       | 4.39 <sup>g-1</sup>      | 6.17 <sup>a-h</sup> | 3.43 <sup>ab</sup>  | 4.22 <sup>ab</sup> | 4.46 <sup>ab</sup> |
| 6856      | 93       | x           | B                | B       | B     | B        | B       | B       | B       | B    | B       | B       | B    | B       | B       | B     | B     | A    | A       | A                  | 5.52 <sup>ab</sup> | 3.73 <sup>b-e</sup>       | 4.26 <sup>j-1</sup>      | 6.02 <sup>b-h</sup> | 3.35 <sup>ab</sup>  | 4.20 <sup>ab</sup> | 4.22 <sup>ab</sup> |
| 6900      | 94       | x           | B                | B       | B     | B        | B       | B       | B       | B    | B       | B       | B    | B       | B       | B     | B     | h    | A       | A                  | 5.48 <sup>ab</sup> | 4.07 <sup>a-e</sup>       | 4.46 <sup>f-1</sup>      | 6.44 <sup>a-h</sup> | 2.76 <sup>bc</sup>  | 3.91 <sup>ab</sup> | 3.73 <sup>ab</sup> |

Table S2, cont.

| Line Name | Genotype ID | 2010 | Genotype |         |       |          |         |         |         |      |         |         |      |         |         |       | Means Separation |      |         |                    |                         |                           |                          |                     |                     |                    |                          |
|-----------|-------------|------|----------|---------|-------|----------|---------|---------|---------|------|---------|---------|------|---------|---------|-------|------------------|------|---------|--------------------|-------------------------|---------------------------|--------------------------|---------------------|---------------------|--------------------|--------------------------|
|           |             |      | TG358    | At10500 | T0536 | CLEX13G5 | U221402 | At55800 | At39950 | TG23 | At17210 | At49510 | TG60 | At31970 | At12590 | T1777 | T1541            | TG69 | At55360 | 09FD_120 Loc1 LEAF | 09FD_120 Loc2 LEAF      | 10FD-early_83 Loc1&2 LEAF | 10FD-late_83 Loc1&2 LEAF | GC_120 p7629 LEAF   | GC_120 p10353 LEAF  | GC_120 Sai10 LEAF  |                          |
| 6321      | 79          | x    | A        | A       | B     | B        | B       | B       | B       | B    | B       | B       | B    | B       | B       | B     | B                | B    | B       | B                  | 5.64 <sup>ab</sup>      | 3.69 <sup>b-e</sup>       | 4.58 <sup>d-l</sup>      | 6.33 <sup>a-h</sup> | 3.33 <sup>ab</sup>  | 3.74 <sup>ab</sup> | 3.18 <sup>ab</sup>       |
| 6747      | 89          |      | A        | A       | B     | B        | B       | B       | B       | B    | B       | B       | B    | B       | B       | B     | B                | B    | B       | B                  | 5.50 <sup>ab</sup>      | 4.29 <sup>a-e</sup>       | --                       | --                  | 3.76 <sup>ab</sup>  | 4.45 <sup>ab</sup> | 4.21 <sup>ab</sup>       |
| 6328      | 80          | x    | A        | A       | A     | B        | B       | B       | B       | B    | B       | B       | B    | B       | B       | B     | B                | B    | B       | B                  | 5.43 <sup>ab</sup>      | 4.01 <sup>a-e</sup>       | 4.58 <sup>d-l</sup>      | 6.63 <sup>a-e</sup> | 3.61 <sup>ab</sup>  | 3.56 <sup>ab</sup> | 4.29 <sup>ab</sup>       |
| 6681      | 86          |      | A        | A       | A     | B        | B       | B       | B       | B    | B       | B       | B    | B       | B       | B     | B                | B    | B       | B                  | 6.14 <sup>ab</sup>      | 4.22 <sup>a-e</sup>       | --                       | --                  | 3.54 <sup>ab</sup>  | 4.21 <sup>ab</sup> | 4.40 <sup>ab</sup>       |
| 6345      | 81          | x    | A        | A       | A     | A        | B       | B       | B       | B    | B       | B       | B    | B       | B       | B     | B                | B    | B       | B                  | 5.93 <sup>ab</sup>      | 4.58 <sup>a-e</sup>       | 4.50 <sup>e-l</sup>      | 5.94 <sup>d-h</sup> | 3.19 <sup>a-c</sup> | 4.25 <sup>ab</sup> | 3.22 <sup>ab</sup>       |
| 6709      | 87          |      | A        | A       | A     | A        | B       | B       | B       | B    | B       | B       | B    | B       | B       | B     | B                | B    | B       | B                  | 5.76 <sup>ab</sup>      | 4.10 <sup>a-e</sup>       | --                       | --                  | 3.15 <sup>a-c</sup> | 3.88 <sup>ab</sup> | 3.53 <sup>ab</sup>       |
| 6288      | 77          | x    | A        | A       | A     | A        | A       | B       | B       | B    | B       | B       | B    | B       | B       | B     | B                | B    | B       | B                  | 5.50 <sup>ab</sup>      | 4.22 <sup>a-e</sup>       | 4.70 <sup>b-l</sup>      | 6.52 <sup>a-g</sup> | 3.25 <sup>a-c</sup> | 3.78 <sup>ab</sup> | 4.09 <sup>ab</sup>       |
| 5516      | 54          | x    | A        | A       | A     | A        | A       | A       | B       | B    | B       | B       | B    | B       | B       | B     | B                | B    | B       | B                  | 5.24 <sup>ab</sup>      | 3.59 <sup>b-e</sup>       | 4.31 <sup>j-l</sup>      | 6.35 <sup>a-h</sup> | 3.51 <sup>ab</sup>  | 3.29 <sup>ab</sup> | 3.70 <sup>ab</sup>       |
| 6226      | 73          |      | A        | A       | A     | A        | A       | A       | B       | B    | B       | B       | B    | B       | B       | B     | B                | B    | B       | B                  | 5.76 <sup>ab</sup>      | 4.49 <sup>a-e</sup>       | --                       | --                  | 3.10 <sup>a-c</sup> | 3.17 <sup>ab</sup> | 4.32 <sup>ab</sup>       |
| 6234      | 74          |      | A        | A       | A     | A        | A       | A       | B       | B    | B       | B       | B    | B       | B       | B     | B                | B    | B       | B                  | <b>4.69<sup>b</sup></b> | 3.25 <sup>de</sup>        | --                       | --                  | 2.85 <sup>a-c</sup> | 4.42 <sup>ab</sup> | 3.79 <sup>ab</sup>       |
| 6423      | 82          |      | A        | A       | A     | A        | A       | A       | B       | B    | B       | B       | B    | B       | B       | B     | B                | B    | B       | B                  | 6.00 <sup>ab</sup>      | 3.98 <sup>a-e</sup>       | --                       | --                  | 3.56 <sup>ab</sup>  | 3.58 <sup>ab</sup> | 4.21 <sup>ab</sup>       |
| 6724      | 88          |      | A        | A       | A     | A        | A       | A       | B       | B    | B       | B       | B    | B       | B       | B     | B                | B    | B       | B                  | 5.17 <sup>ab</sup>      | 3.96 <sup>a-e</sup>       | --                       | --                  | 3.52 <sup>ab</sup>  | 3.85 <sup>ab</sup> | 3.48 <sup>ab</sup>       |
| 7166      | 101         |      | A        | A       | A     | A        | A       | A       | B       | B    | B       | B       | B    | B       | B       | B     | B                | B    | B       | B                  | 5.33 <sup>ab</sup>      | 3.93 <sup>a-e</sup>       | --                       | --                  | 3.00 <sup>a-c</sup> | 4.23 <sup>ab</sup> | 3.11 <sup>ab</sup>       |
| 6261      | 75          | x    | A        | A       | A     | A        | A       | A       | A       | B    | B       | B       | B    | B       | B       | B     | B                | B    | B       | B                  | 5.00 <sup>ab</sup>      | 4.12 <sup>a-e</sup>       | 4.70 <sup>a-l</sup>      | 6.17 <sup>a-h</sup> | 3.07 <sup>a-c</sup> | 3.60 <sup>ab</sup> | <b>2.76<sup>ab</sup></b> |
| 6782      | 90          |      | A        | A       | A     | A        | A       | A       | A       | B    | B       | B       | B    | B       | B       | B     | B                | B    | B       | B                  | 5.60 <sup>ab</sup>      | 4.24 <sup>a-e</sup>       | --                       | --                  | 2.96 <sup>a-c</sup> | 4.12 <sup>ab</sup> | 3.76 <sup>ab</sup>       |
| 5861      | 64          | x    | A        | A       | A     | A        | A       | A       | A       | A    | B       | B       | B    | B       | B       | B     | B                | B    | B       | B                  | 5.24 <sup>ab</sup>      | 4.24 <sup>a-e</sup>       | 4.25 <sup>kl</sup>       | 6.09 <sup>b-h</sup> | 2.95 <sup>a-c</sup> | 3.44 <sup>ab</sup> | 4.11 <sup>ab</sup>       |
| 6799      | 91          |      | A        | A       | A     | A        | A       | A       | A       | A    | B       | B       | B    | B       | B       | B     | B                | B    | B       | B                  | 5.43 <sup>ab</sup>      | 3.61 <sup>b-e</sup>       | --                       | --                  | 3.19 <sup>a-c</sup> | 4.10 <sup>ab</sup> | 3.47 <sup>ab</sup>       |
| 5616      | 58          | x    | A        | A       | A     | A        | A       | A       | A       | A    | A       | B       | B    | B       | B       | B     | B                | B    | B       | B                  | 5.36 <sup>ab</sup>      | 4.20 <sup>a-e</sup>       | 4.32 <sup>j-l</sup>      | 5.83 <sup>gh</sup>  | 3.12 <sup>a-c</sup> | 4.47 <sup>a</sup>  | 3.64 <sup>ab</sup>       |
| 5920      | 66          |      | A        | A       | A     | A        | A       | A       | A       | A    | A       | B       | B    | B       | B       | B     | B                | B    | B       | B                  | 5.76 <sup>ab</sup>      | 4.14 <sup>a-e</sup>       | --                       | --                  | 3.21 <sup>a-c</sup> | 4.07 <sup>ab</sup> | 3.17 <sup>ab</sup>       |
| 5941      | 67          |      | A        | A       | A     | A        | A       | A       | A       | A    | A       | B       | B    | B       | B       | B     | B                | B    | B       | B                  | 5.40 <sup>ab</sup>      | 4.46 <sup>a-e</sup>       | --                       | --                  | 3.46 <sup>ab</sup>  | 4.89 <sup>a</sup>  | 3.40 <sup>ab</sup>       |

Table S2, cont.

| Line Name               | Genotype    |      | Means Separation |         |       |          |         |         |         |      |         |         |      |         |         |       |       |      |         |                    |                    |                           |                          |                     |                     |                    |                    |
|-------------------------|-------------|------|------------------|---------|-------|----------|---------|---------|---------|------|---------|---------|------|---------|---------|-------|-------|------|---------|--------------------|--------------------|---------------------------|--------------------------|---------------------|---------------------|--------------------|--------------------|
|                         | Genotype ID | 2010 | TG358            | At10500 | T0536 | clEX13G5 | U221402 | At55800 | At39950 | TG23 | At17210 | At49510 | TG60 | At31970 | At12590 | T1777 | T1541 | TG69 | At55360 | 09FD_120 Loc1 LEAF | 09FD_120 Loc2 LEAF | 10FD-early_83 Loc1&2 LEAF | 10FD-late_83 Loc1&2 LEAF | GC_120 p7629 LEAF   | GC_120 p10353 LEAF  | GC_120 Sal10 LEAF  |                    |
| 5968                    | 68          |      | A                | A       | A     | A        | A       | A       | A       | A    | A       | A       | B    | B       | B       | B     | B     | B    | B       | B                  | 5.67 <sup>ab</sup> | 4.40 <sup>a-e</sup>       | --                       | --                  | 2.94 <sup>a-c</sup> | 4.37 <sup>ab</sup> | 3.87 <sup>ab</sup> |
| 5705                    | 59          | x    | A                | A       | A     | A        | A       | A       | A       | A    | A       | A       | A    | A       | B       | B     | B     | B    | B       | B                  | 6.57 <sup>a</sup>  | 4.82 <sup>a-d</sup>       | 5.00 <sup>a-h</sup>      | 6.40 <sup>a-h</sup> | 2.91 <sup>a-c</sup> | 3.43 <sup>ab</sup> | 4.49 <sup>ab</sup> |
| 5722                    | 60          | x    | A                | A       | A     | A        | A       | A       | A       | A    | A       | A       | A    | A       | B       | B     | B     | B    | B       | B                  | 5.67 <sup>ab</sup> | 4.84 <sup>a-d</sup>       | 4.98 <sup>a-h</sup>      | 6.49 <sup>a-h</sup> | 3.01 <sup>a-c</sup> | 3.91 <sup>ab</sup> | 4.40 <sup>ab</sup> |
| 6011                    | 69          | x    | A                | A       | A     | A        | A       | A       | A       | A    | A       | A       | A    | A       | B       | B     | B     | B    | B       | B                  | 6.00 <sup>ab</sup> | 4.58 <sup>a-e</sup>       | 4.66 <sup>c-l</sup>      | 6.32 <sup>a-h</sup> | 3.17 <sup>a-c</sup> | 4.46 <sup>ab</sup> | 4.61 <sup>ab</sup> |
| 6302                    | 78          | x    | A                | A       | A     | A        | A       | A       | A       | A    | A       | A       | A    | A       | B       | B     | B     | B    | B       | B                  | 4.69 <sup>b</sup>  | 5.07 <sup>a-c</sup>       | 5.13 <sup>a-e</sup>      | 6.33 <sup>a-h</sup> | 2.91 <sup>a-c</sup> | 4.04 <sup>ab</sup> | 3.77 <sup>ab</sup> |
| 5605                    | 57          | x    | A                | A       | A     | A        | A       | A       | A       | A    | A       | A       | A    | A       | A       | A     | B     | B    | B       | B                  | 6.40 <sup>a</sup>  | 5.29 <sup>ab</sup>        | 5.00 <sup>a-g</sup>      | 6.60 <sup>a-f</sup> | 3.40 <sup>ab</sup>  | 3.81 <sup>ab</sup> | 3.88 <sup>ab</sup> |
| 5771                    | 62          | x    | A                | A       | A     | A        | A       | A       | A       | A    | A       | A       | A    | A       | A       | A     | A     | B    | B       | B                  | 6.00 <sup>ab</sup> | 4.12 <sup>a-e</sup>       | 4.90 <sup>a-k</sup>      | 5.92 <sup>e-h</sup> | 3.30 <sup>a-c</sup> | 3.69 <sup>ab</sup> | 4.35 <sup>ab</sup> |
| 6094                    | 71          | x    | A                | A       | A     | A        | A       | A       | A       | A    | A       | A       | A    | A       | A       | A     | A     | B    | B       | B                  | 6.33 <sup>ab</sup> | 4.17 <sup>a-e</sup>       | 4.77 <sup>a-l</sup>      | 6.36 <sup>a-h</sup> | 3.53 <sup>ab</sup>  | 4.39 <sup>ab</sup> | 3.58 <sup>ab</sup> |
| 6278                    | 76          | x    | A                | A       | A     | A        | A       | A       | A       | A    | A       | A       | A    | A       | A       | A     | A     | B    | B       | B                  | 6.00 <sup>ab</sup> | 3.89 <sup>a-e</sup>       | 5.34 <sup>ab</sup>       | 6.62 <sup>a-e</sup> | 2.94 <sup>a-c</sup> | 3.52 <sup>ab</sup> | 3.45 <sup>ab</sup> |
| 7610                    | 109         | x    | A                | A       | A     | A        | A       | A       | A       | A    | A       | A       | A    | A       | A       | A     | A     | B    | B       | B                  | 6.07 <sup>ab</sup> | 4.60 <sup>a-e</sup>       | 5.19 <sup>a-d</sup>      | 6.30 <sup>a-h</sup> | 3.18 <sup>a-c</sup> | 4.42 <sup>ab</sup> | 3.68 <sup>ab</sup> |
| 5726                    | 61          | x    | A                | A       | A     | A        | A       | A       | A       | A    | A       | A       | A    | A       | A       | A     | A     | A    | B       | B                  | 6.00 <sup>ab</sup> | 4.39 <sup>a-e</sup>       | 5.35 <sup>a</sup>        | 6.84 <sup>a</sup>   | 3.08 <sup>a-c</sup> | 3.66 <sup>ab</sup> | 3.77 <sup>ab</sup> |
| 6042                    | 63          | x    | A                | A       | A     | A        | A       | A       | A       | A    | A       | A       | A    | A       | A       | A     | A     | A    | B       | B                  | 5.64 <sup>ab</sup> | 4.11 <sup>a-e</sup>       | 4.84 <sup>a-l</sup>      | 6.25 <sup>a-h</sup> | 3.88 <sup>a</sup>   | 4.34 <sup>ab</sup> | 3.96 <sup>ab</sup> |
| 6805                    | 92          | x    | A                | A       | A     | A        | A       | A       | A       | A    | A       | B       | A    | A       | A       | A     | A     | A    | A       | A                  | 5.55 <sup>ab</sup> | 4.30 <sup>a-e</sup>       | 4.84 <sup>a-l</sup>      | 6.48 <sup>a-h</sup> | 3.20 <sup>a-c</sup> | 3.88 <sup>ab</sup> | 4.13 <sup>ab</sup> |
| <b>Means Separation</b> |             |      |                  |         |       |          |         |         |         |      |         |         |      |         |         |       |       |      |         | *                  | *                  | *                         | *                        | *                   | *                   | *                  |                    |

Table S2, cont.

| Line Name | Genotype<br>ID | 2010 | Means Separation        |                            |                            |                           |                           |                     |                    |                    |  |
|-----------|----------------|------|-------------------------|----------------------------|----------------------------|---------------------------|---------------------------|---------------------|--------------------|--------------------|--|
|           |                |      | 09FD_120 Loc1&2<br>STEM | 10FD-early_83 Loc1<br>STEM | 10FD-early_83 Loc2<br>STEM | 10FD-late_83 Loc1<br>STEM | 10FD-late_83 Loc2<br>STEM | GC_120 p7629 STEM   | GC_120 p10353 STEM | GC_120 Sal10 STEM  |  |
| Hyp45-A   | 121            | x    | 3.38 <sup>a-d</sup>     | 3.78 <sup>a-h</sup>        | 3.02 <sup>a-e</sup>        | 5.00                      | 4.77 <sup>ab</sup>        | 2.13 <sup>a</sup>   | 2.45 <sup>a</sup>  | 2.20 <sup>ab</sup> |  |
| Hyp45-B   | 122            |      | 3.37 <sup>a-d</sup>     | --                         | --                         | --                        | --                        | --                  | --                 | --                 |  |
| E6203-A   | 123            | x    | 2.61 <sup>b-j</sup>     | 3.68 <sup>b-h</sup>        | 2.70 <sup>b-i</sup>        | 4.82                      | 4.55 <sup>a-d</sup>       | --                  | --                 | --                 |  |
| E6203-B   | 124            | x    | 2.64 <sup>b-j</sup>     | 3.78 <sup>a-h</sup>        | 2.70 <sup>b-i</sup>        | 4.81                      | 4.25 <sup>a-f</sup>       | 1.62 <sup>a-c</sup> | 2.10 <sup>ab</sup> | 1.97 <sup>ab</sup> |  |
| E6203-C   | 129            | x    | --                      | 3.64 <sup>b-h</sup>        | 2.75 <sup>b-i</sup>        | 4.82                      | 4.61 <sup>a-c</sup>       | --                  | --                 | --                 |  |
| E6203-D   | 130            | x    | --                      | 3.56 <sup>b-h</sup>        | 2.38 <sup>b-i</sup>        | 4.56                      | 4.30 <sup>a-f</sup>       | --                  | --                 | --                 |  |
| LB5-NIL-A | 125            | x    | 3.35 <sup>a-e</sup>     | 3.86 <sup>a-e</sup>        | 3.10 <sup>a-d</sup>        | 5.00                      | 4.23 <sup>a-f</sup>       | 1.37 <sup>bc</sup>  | 1.61 <sup>b</sup>  | 1.96 <sup>ab</sup> |  |
| LB5-NIL-B | 127            | x    | --                      | 3.90 <sup>a-d</sup>        | 3.30 <sup>ab</sup>         | 4.82                      | 4.23 <sup>a-f</sup>       | --                  | --                 | --                 |  |
| 7187      | 102            |      | 2.39 <sup>f-j</sup>     | --                         | --                         | --                        | --                        | 1.60 <sup>a-c</sup> | 2.48 <sup>ab</sup> | 1.03 <sup>b</sup>  |  |
| 7214      | 103            | x    | 2.82 <sup>b-j</sup>     | 3.23 <sup>f-i</sup>        | 1.80 <sup>hi</sup>         | 4.78                      | 3.66 <sup>d-f</sup>       | 1.27 <sup>a-c</sup> | 2.60 <sup>ab</sup> | 2.48 <sup>ab</sup> |  |
| 5455      | 52             | x    | 3.04 <sup>a-h</sup>     | 3.62 <sup>b-h</sup>        | 2.84 <sup>a-h</sup>        | 4.75                      | 4.11 <sup>a-f</sup>       | 2.09 <sup>a-c</sup> | 2.24 <sup>ab</sup> | 2.62 <sup>ab</sup> |  |
| 5470      | 53             | x    | 2.59 <sup>b-j</sup>     | 3.74 <sup>a-h</sup>        | 2.65 <sup>b-i</sup>        | 4.65                      | 3.66 <sup>d-f</sup>       | 1.60 <sup>a-c</sup> | 2.50 <sup>ab</sup> | 2.67 <sup>ab</sup> |  |
| 7127      | 100            | x    | 3.28 <sup>a-f</sup>     | 3.66 <sup>b-h</sup>        | 3.00 <sup>a-f</sup>        | 4.71                      | 3.79 <sup>c-f</sup>       | 1.84 <sup>a-c</sup> | 2.63 <sup>ab</sup> | 2.16 <sup>ab</sup> |  |



Table S2, cont.

| Line Name | Genotype<br>ID | 2010 | Means Separation         |                            |                            |                           |                           |                     |                    |                          |  |
|-----------|----------------|------|--------------------------|----------------------------|----------------------------|---------------------------|---------------------------|---------------------|--------------------|--------------------------|--|
|           |                |      | 09FD_120 Loc1&2<br>STEM  | 10FD-early_83 Loc1<br>STEM | 10FD-early_83 Loc2<br>STEM | 10FD-late_83 Loc1<br>STEM | 10FD-late_83 Loc2<br>STEM | GC_120 p7629 STEM   | GC_120 p10353 STEM | GC_120 Sai110 STEM       |  |
| 7094      | 99             | x    | 2.65 <sup>b-j</sup>      | 3.38 <sup>d-i</sup>        | 2.73 <sup>b-i</sup>        | 4.53                      | 3.98 <sup>b-i</sup>       | 1.48 <sup>a-c</sup> | 2.27 <sup>ab</sup> | 2.50 <sup>ab</sup>       |  |
| 7226      | 104            |      | 2.72 <sup>b-j</sup>      | --                         | --                         | --                        | --                        | 1.85 <sup>a-c</sup> | 2.78 <sup>ab</sup> | 2.35 <sup>ab</sup>       |  |
| 6555      | 84             | x    | 2.89 <sup>b-j</sup>      | 3.80 <sup>a-f</sup>        | 2.48 <sup>b-i</sup>        | 4.75                      | 4.30 <sup>a-f</sup>       | 1.53 <sup>a-c</sup> | 2.10 <sup>ab</sup> | 1.67 <sup>ab</sup>       |  |
| 7444      | 106            |      | 2.92 <sup>b-j</sup>      | --                         | --                         | --                        | --                        | 1.88 <sup>a-c</sup> | 2.24 <sup>ab</sup> | 2.06 <sup>ab</sup>       |  |
| 7471      | 108            | x    | 2.48 <sup>d-j</sup>      | 3.76 <sup>a-h</sup>        | 2.40 <sup>b-i</sup>        | 4.82                      | 3.96 <sup>b-f</sup>       | 1.86 <sup>a-c</sup> | 2.01 <sup>ab</sup> | 2.37 <sup>ab</sup>       |  |
| 5592      | 56             | x    | 2.42 <sup>e-j</sup>      | 3.62 <sup>b-h</sup>        | 2.08 <sup>d-i</sup>        | <b>4.47</b>               | 3.86 <sup>c-f</sup>       | 1.54 <sup>a-c</sup> | 2.18 <sup>ab</sup> | 1.52 <sup>ab</sup>       |  |
| 6215      | 72             | x    | 2.31 <sup>g-j</sup>      | 3.18 <sup>g-i</sup>        | <b>1.67</b> <sup>i</sup>   | 4.88                      | 3.73 <sup>c-f</sup>       | 1.61 <sup>a-c</sup> | 1.98 <sup>ab</sup> | 2.24 <sup>ab</sup>       |  |
| 6497      | 83             | x    | 2.83 <sup>b-j</sup>      | 3.34 <sup>d-i</sup>        | 2.32 <sup>b-i</sup>        | 4.75                      | 3.91 <sup>b-f</sup>       | 1.20 <sup>a-c</sup> | 2.45 <sup>a</sup>  | 2.20 <sup>ab</sup>       |  |
| 6979      | 98             | x    | 2.66 <sup>b-j</sup>      | 3.51 <sup>b-i</sup>        | 2.53 <sup>b-i</sup>        | 5.00                      | 4.18 <sup>a-f</sup>       | 2.12 <sup>a-c</sup> | 2.43 <sup>ab</sup> | 2.33 <sup>ab</sup>       |  |
| 5553      | 55             |      | 3.02 <sup>a-i</sup>      | --                         | --                         | --                        | --                        | 1.75 <sup>a-c</sup> | 2.13 <sup>ab</sup> | 2.29 <sup>ab</sup>       |  |
| 5873      | 65             | x    | 2.55 <sup>b-j</sup>      | 3.54 <sup>b-i</sup>        | 2.48 <sup>b-i</sup>        | 4.81                      | 3.84 <sup>c-f</sup>       | 2.04 <sup>a-c</sup> | 1.99 <sup>ab</sup> | 2.32 <sup>ab</sup>       |  |
| 6941      | 96             | x    | 2.63 <sup>b-j</sup>      | 3.58 <sup>b-h</sup>        | 1.90 <sup>t-i</sup>        | 4.75                      | 3.54 <sup>e-f</sup>       | 1.11 <sup>a-c</sup> | 1.66 <sup>ab</sup> | 1.18 <sup>b</sup>        |  |
| 7459      | 107            | x    | 2.50 <sup>c-j</sup>      | 3.25 <sup>e-i</sup>        | 2.45 <sup>b-i</sup>        | 4.75                      | 3.98 <sup>b-f</sup>       | 1.38 <sup>a-c</sup> | 1.79 <sup>ab</sup> | 1.69 <sup>ab</sup>       |  |
| 6603      | 85             |      | <b>2.02</b> <sup>j</sup> | --                         | --                         | --                        | --                        | 1.82 <sup>a-c</sup> | 2.64 <sup>ab</sup> | 1.59 <sup>ab</sup>       |  |
| 6947      | 97             | x    | 2.10 <sup>ij</sup>       | <b>2.93</b> <sup>i</sup>   | 2.07 <sup>d-i</sup>        | 4.77                      | <b>3.48</b> <sup>f</sup>  | 1.84 <sup>a-c</sup> | 1.81 <sup>ab</sup> | <b>1.03</b> <sup>b</sup> |  |
| 6072      | 70             | x    | 2.76 <sup>b-j</sup>      | 3.49 <sup>b-i</sup>        | 1.98 <sup>e-i</sup>        | 5.00                      | 3.80 <sup>c-f</sup>       | 1.82 <sup>a-c</sup> | 1.65 <sup>ab</sup> | 2.09 <sup>ab</sup>       |  |
| 6927      | 95             | x    | 2.65 <sup>b-j</sup>      | 3.44 <sup>c-i</sup>        | 2.15 <sup>c-i</sup>        | 4.71                      | 3.93 <sup>b-f</sup>       | 1.44 <sup>a-c</sup> | 1.79 <sup>ab</sup> | 2.18 <sup>ab</sup>       |  |
| 7374      | 105            | x    | 2.63 <sup>b-j</sup>      | 3.48 <sup>b-i</sup>        | 2.80 <sup>b-h</sup>        | 4.75                      | 3.91 <sup>b-f</sup>       | 2.05 <sup>a-c</sup> | 2.53 <sup>ab</sup> | 2.39 <sup>ab</sup>       |  |
| 6856      | 93             | x    | 3.29 <sup>a-f</sup>      | 3.59 <sup>b-h</sup>        | 2.58 <sup>b-i</sup>        | 4.71                      | 3.96 <sup>b-f</sup>       | 1.91 <sup>a-c</sup> | 2.59 <sup>ab</sup> | 2.26 <sup>ab</sup>       |  |
| 6900      | 94             | x    | 3.22 <sup>a-g</sup>      | 3.48 <sup>b-i</sup>        | 2.57 <sup>b-i</sup>        | 4.94                      | 3.79 <sup>c-f</sup>       | 1.64 <sup>a-c</sup> | 2.41 <sup>ab</sup> | 1.83 <sup>ab</sup>       |  |

Table S2, cont.

| Line Name | Genotype<br>ID | 2010 | Means Separation        |                            |                            |                           |                           |                     |                    |                    |  |
|-----------|----------------|------|-------------------------|----------------------------|----------------------------|---------------------------|---------------------------|---------------------|--------------------|--------------------|--|
|           |                |      | 09FD_120 Loc1&2<br>STEM | 10FD-early_83 Loc1<br>STEM | 10FD-early_83 Loc2<br>STEM | 10FD-late_83 Loc1<br>STEM | 10FD-late_83 Loc2<br>STEM | GC_120 p7629 STEM   | GC_120 p10353 STEM | GC_120 Sal110 STEM |  |
| 6321      | 79             | x    | 3.42 <sup>a-c</sup>     | 4.08 <sup>ab</sup>         | 3.15 <sup>a-d</sup>        | 5.00                      | 4.46 <sup>a-d</sup>       | 2.51 <sup>ab</sup>  | 1.88 <sup>ab</sup> | 1.89 <sup>ab</sup> |  |
| 6747      | 89             |      | 2.90 <sup>b-j</sup>     | --                         | --                         | --                        | --                        | 1.92 <sup>a-c</sup> | 2.53 <sup>ab</sup> | 1.94 <sup>ab</sup> |  |
| 6328      | 80             | x    | 2.84 <sup>b-j</sup>     | 3.58 <sup>b-h</sup>        | 2.57 <sup>b-i</sup>        | 4.83                      | 4.29 <sup>a-f</sup>       | 1.59 <sup>a-c</sup> | 1.97 <sup>ab</sup> | 2.61 <sup>ab</sup> |  |
| 6681      | 86             |      | 2.74 <sup>b-j</sup>     | --                         | --                         | --                        | --                        | 1.99 <sup>a-c</sup> | 2.39 <sup>ab</sup> | 2.34 <sup>ab</sup> |  |
| 6345      | 81             | x    | 2.97 <sup>a-i</sup>     | 3.66 <sup>b-h</sup>        | 2.90 <sup>a-h</sup>        | 4.65                      | 3.91 <sup>b-f</sup>       | 1.37 <sup>a-c</sup> | 2.18 <sup>ab</sup> | 1.40 <sup>ab</sup> |  |
| 6709      | 87             |      | 2.93 <sup>b-j</sup>     | --                         | --                         | --                        | --                        | 1.95 <sup>a-c</sup> | 2.34 <sup>ab</sup> | 1.85 <sup>ab</sup> |  |
| 6288      | 77             | x    | 3.43 <sup>ab</sup>      | 3.79 <sup>a-g</sup>        | 3.35 <sup>ab</sup>         | 5.00                      | 4.41 <sup>a-e</sup>       | 1.79 <sup>a-c</sup> | 2.33 <sup>ab</sup> | 2.16 <sup>ab</sup> |  |
| 5516      | 54             | x    | 3.17 <sup>a-h</sup>     | 3.66 <sup>b-h</sup>        | 2.70 <sup>b-i</sup>        | 4.75                      | 3.98 <sup>b-f</sup>       | 1.93 <sup>a-c</sup> | 1.58 <sup>ab</sup> | 1.93 <sup>ab</sup> |  |
| 6226      | 73             |      | 3.12 <sup>a-h</sup>     | --                         | --                         | --                        | --                        | 1.55 <sup>a-c</sup> | 1.58 <sup>ab</sup> | 2.25 <sup>ab</sup> |  |
| 6234      | 74             |      | 2.95 <sup>b-i</sup>     | --                         | --                         | --                        | --                        | 1.43 <sup>a-c</sup> | 2.36 <sup>ab</sup> | 2.08 <sup>ab</sup> |  |
| 6423      | 82             |      | 2.28 <sup>h-j</sup>     | --                         | --                         | --                        | --                        | 1.90 <sup>a-c</sup> | 1.86 <sup>ab</sup> | 2.28 <sup>ab</sup> |  |
| 6724      | 88             |      | 2.74 <sup>b-j</sup>     | --                         | --                         | --                        | --                        | 2.35 <sup>ab</sup>  | 2.25 <sup>ab</sup> | 1.45 <sup>ab</sup> |  |
| 7166      | 101            |      | 3.00 <sup>a-i</sup>     | --                         | --                         | --                        | --                        | 1.52 <sup>a-c</sup> | 2.23 <sup>ab</sup> | 1.26 <sup>b</sup>  |  |
| 6261      | 75             | x    | 2.71 <sup>b-j</sup>     | 3.84 <sup>a-f</sup>        | 3.27 <sup>ab</sup>         | 4.84                      | 4.46 <sup>a-d</sup>       | 1.30 <sup>a-c</sup> | 2.20 <sup>ab</sup> | 1.47 <sup>ab</sup> |  |
| 6782      | 90             |      | 2.93 <sup>b-j</sup>     | --                         | --                         | --                        | --                        | 1.88 <sup>a-c</sup> | 2.58 <sup>ab</sup> | 2.15 <sup>ab</sup> |  |
| 5861      | 64             | x    | 2.79 <sup>b-j</sup>     | 3.76 <sup>a-h</sup>        | 3.13 <sup>a-d</sup>        | 4.82                      | 3.98 <sup>b-f</sup>       | 1.45 <sup>a-c</sup> | 2.01 <sup>ab</sup> | 2.37 <sup>ab</sup> |  |
| 6799      | 91             |      | 3.23 <sup>a-g</sup>     | --                         | --                         | --                        | --                        | 1.48 <sup>a-c</sup> | 2.38 <sup>ab</sup> | 2.05 <sup>ab</sup> |  |
| 5616      | 58             | x    | 2.96 <sup>b-i</sup>     | 4.01 <sup>a-c</sup>        | 3.09 <sup>a-d</sup>        | 4.79                      | 4.48 <sup>a-d</sup>       | 1.86 <sup>a-c</sup> | 2.71 <sup>ab</sup> | 2.03 <sup>ab</sup> |  |
| 5920      | 66             |      | 3.25 <sup>a-f</sup>     | --                         | --                         | --                        | --                        | 2.16 <sup>a-c</sup> | 2.20 <sup>ab</sup> | 2.26 <sup>ab</sup> |  |
| 5941      | 67             |      | 3.13 <sup>a-h</sup>     | --                         | --                         | --                        | --                        | 2.43 <sup>a</sup>   | 3.07 <sup>a</sup>  | 1.74 <sup>ab</sup> |  |

Table S2, cont.

| Line Name               | Genotype<br>ID | 2010 | Means Separation        |                            |                            |                           |                           |                         |                          |                    |                    |
|-------------------------|----------------|------|-------------------------|----------------------------|----------------------------|---------------------------|---------------------------|-------------------------|--------------------------|--------------------|--------------------|
|                         |                |      | 09FD_120 Loc1&2<br>STEM | 10FD-early_83 Loc1<br>STEM | 10FD-early_83 Loc2<br>STEM | 10FD-late_83 Loc1<br>STEM | 10FD-late_83 Loc2<br>STEM | GC_120 p7629 STEM       | GC_120 p10353 STEM       | GC_120 Sal10 STEM  |                    |
| 5968                    | 68             |      | 2.85 <sup>b-j</sup>     | --                         | --                         | --                        | --                        | --                      | 1.70 <sup>a-c</sup>      | 2.89 <sup>ab</sup> | 1.93 <sup>ab</sup> |
| 5705                    | 59             | x    | 3.16 <sup>a-h</sup>     | 3.86 <sup>a-e</sup>        | 2.80 <sup>b-h</sup>        | 5.00                      | 4.36 <sup>a-f</sup>       | 1.18 <sup>a-c</sup>     | 2.30 <sup>ab</sup>       | 2.81 <sup>ab</sup> |                    |
| 5722                    | 60             | x    | 2.27 <sup>h-j</sup>     | 3.26 <sup>e-i</sup>        | 2.30 <sup>b-i</sup>        | 4.69                      | 4.00 <sup>a-f</sup>       | <b>0.96<sup>c</sup></b> | 1.87 <sup>ab</sup>       | 1.71 <sup>ab</sup> |                    |
| 6011                    | 69             | x    | 3.89 <sup>a</sup>       | 4.31 <sup>a</sup>          | 3.92 <sup>a</sup>          | 5.00                      | 4.89 <sup>a</sup>         | 1.97 <sup>a-c</sup>     | 2.75 <sup>ab</sup>       | 3.43 <sup>a</sup>  |                    |
| 6302                    | 78             | x    | 2.55 <sup>b-j</sup>     | 3.82 <sup>a-f</sup>        | 3.22 <sup>a-c</sup>        | 4.93                      | 4.63 <sup>a-c</sup>       | 1.83 <sup>a-c</sup>     | 2.48 <sup>ab</sup>       | 1.98 <sup>ab</sup> |                    |
| 5605                    | 57             | x    | 2.80 <sup>b-j</sup>     | 3.72 <sup>a-h</sup>        | 2.98 <sup>a-f</sup>        | 4.94                      | 4.36 <sup>a-f</sup>       | 1.80 <sup>a-c</sup>     | 2.10 <sup>ab</sup>       | 1.73 <sup>ab</sup> |                    |
| 5771                    | 62             | x    | 3.00 <sup>a-i</sup>     | 3.84 <sup>a-f</sup>        | 2.98 <sup>a-f</sup>        | 4.88                      | 4.11 <sup>a-f</sup>       | 1.63 <sup>a-c</sup>     | 1.84 <sup>ab</sup>       | 2.63 <sup>ab</sup> |                    |
| 6094                    | 71             | x    | 2.82 <sup>b-j</sup>     | 3.76 <sup>a-h</sup>        | 3.00 <sup>a-f</sup>        | 4.72                      | 4.09 <sup>a-f</sup>       | 1.85 <sup>a-c</sup>     | 2.23 <sup>ab</sup>       | 1.89 <sup>ab</sup> |                    |
| 6278                    | 76             | x    | 2.96 <sup>a-i</sup>     | 3.66 <sup>b-h</sup>        | 2.52 <sup>b-i</sup>        | 4.88                      | 4.61 <sup>a-c</sup>       | 1.76 <sup>a-c</sup>     | 1.94 <sup>ab</sup>       | 1.75 <sup>ab</sup> |                    |
| 7610                    | 109            | x    | 2.94 <sup>b-j</sup>     | 3.66 <sup>b-h</sup>        | 3.00 <sup>a-f</sup>        | 5.00                      | 4.09 <sup>a-f</sup>       | 1.37 <sup>a-c</sup>     | 2.32 <sup>ab</sup>       | 1.92 <sup>ab</sup> |                    |
| 5726                    | 61             | x    | 2.30 <sup>h-j</sup>     | 3.18 <sup>hi</sup>         | 1.83 <sup>g-i</sup>        | 4.93                      | 3.77 <sup>c-f</sup>       | 1.43 <sup>a-c</sup>     | <b>1.36<sup>ab</sup></b> | 1.95 <sup>ab</sup> |                    |
| 6042                    | 63             | x    | 2.70 <sup>b-j</sup>     | 3.86 <sup>a-e</sup>        | 2.47 <sup>b-i</sup>        | 4.75                      | 4.27 <sup>a-f</sup>       | 2.45 <sup>a</sup>       | 2.65 <sup>ab</sup>       | 2.04 <sup>ab</sup> |                    |
| 6805                    | 92             | x    | 2.80 <sup>b-j</sup>     | 3.84 <sup>a-f</sup>        | 2.93 <sup>a-g</sup>        | 4.74                      | 4.41 <sup>a-e</sup>       | 1.43 <sup>a-c</sup>     | 2.04 <sup>ab</sup>       | 1.92 <sup>ab</sup> |                    |
| <b>Means Separation</b> |                |      | *                       | *                          | *                          | ns                        | *                         | *                       | *                        | *                  |                    |

<sup>a</sup> In Proc MIXED in SAS, means separation are calculated using both the difference between means and the number of replications for each entry. Therefore, letter rankings are not always contiguous.

A double dash (--) indicates that the line was not included in the experiment.

An asterisk (\*) indicates significance at  $P \leq 0.05$  and "ns" indicates not significant.

**Table S3 Genotypes and means separation of sub-NILs for chr11**

Means separation is given for all 09FD\_120, GC\_120, and 10FD\_83 traits. Line Name indicates the name of each control or sub-NIL. The four digit designation for each sub-NIL is preceded by "08GH". The "2010" column indicates which lines were included in the 2010 field experiment. In the Genotype section, "A" indicates homozygosity for the *S. lycopersicum* allele and "B" indicates homozygosity for the *S. habrochaites* allele. Trait names are given according to dataset, location or isolate, and trait evaluated. The lowest mean AUDPC for each trait is in bold and underlined.

| Line Name  | Genotype |      |       |       |       |    |         |       |         |         |       |         |         |         |         |         |          |         | Means Separation |         |         |         |       |                      |                           |                         |                        |                         |
|------------|----------|------|-------|-------|-------|----|---------|-------|---------|---------|-------|---------|---------|---------|---------|---------|----------|---------|------------------|---------|---------|---------|-------|----------------------|---------------------------|-------------------------|------------------------|-------------------------|
|            | ID       | 2010 | TG194 | T0408 | SSR67 | J1 | At22570 | TG523 | At16710 | U340899 | CT182 | At22260 | At02870 | At44446 | At21690 | At44790 | CLEX4G10 | CLEB7L1 | TG147            | At14260 | At10050 | At04590 | TG400 | 09FD_120 Loc1&2 LEAF | 10FD-early_83 Loc1&2 LEAF | 10FD-late_83 Loc1 LEAF  | 10FD-late_83 Loc2 LEAF |                         |
| Hyp45-A    | 121      | x    | A     | A     | A     | A  | A       | A     | A       | A       | A     | A       | A       | A       | A       | A       | A        | A       | A                | A       | A       | A       | A     | A                    | 5.54 <sup>a</sup>         | 5.37 <sup>a</sup>       | 6.70 <sup>a-d</sup>    | 6.71 <sup>ab</sup>      |
| Hyp45-B    | 122      |      | A     | A     | A     | A  | A       | A     | A       | A       | A     | A       | A       | A       | A       | A       | A        | A       | A                | A       | A       | A       | A     | A                    | 5.89 <sup>a</sup>         | --                      | --                     | --                      |
| E6203-A    | 123      | x    | A     | A     | A     | A  | A       | A     | A       | A       | A     | A       | A       | A       | A       | A       | A        | A       | A                | A       | A       | A       | A     | A                    | 5.55 <sup>a</sup>         | 5.31 <sup>ab</sup>      | 6.40 <sup>a-g</sup>    | 6.89 <sup>a</sup>       |
| E6203-B    | 124      | x    | A     | A     | A     | A  | A       | A     | A       | A       | A     | A       | A       | A       | A       | A       | A        | A       | A                | A       | A       | A       | A     | A                    | 5.67 <sup>a</sup>         | 5.10 <sup>a-d</sup>     | 6.50 <sup>a-f</sup>    | 6.54 <sup>a-c</sup>     |
| E6203-C    | 129      | x    | A     | A     | A     | A  | A       | A     | A       | A       | A     | A       | A       | A       | A       | A       | A        | A       | A                | A       | A       | A       | A     | A                    | --                        | 5.04 <sup>a-d</sup>     | 6.40 <sup>a-g</sup>    | 6.48 <sup>a-c</sup>     |
| E6203-D    | 130      | x    | A     | A     | A     | A  | A       | A     | A       | A       | A     | A       | A       | A       | A       | A       | A        | A       | A                | A       | A       | A       | A     | A                    | --                        | 5.07 <sup>a-d</sup>     | 6.00 <sup>b-g</sup>    | 6.71 <sup>ab</sup>      |
| LB11-NIL-A | 126      | x    | B     | B     | B     | B  | B       | B     | B       | B       | B     | B       | B       | B       | B       | B       | B        | B       | B                | B       | B       | B       | B     | B                    | 4.95 <sup>ab</sup>        | 4.35 <sup>f-h</sup>     | 5.90 <sup>c-g</sup>    | 6.05 <sup>a-c</sup>     |
| LB11-NIL-B | 128      | x    | B     | B     | B     | B  | B       | B     | B       | B       | B     | B       | B       | B       | B       | B       | B        | B       | B                | B       | B       | B       | B     | B                    | --                        | <b>4.15<sup>h</sup></b> | 5.60 <sup>fg</sup>     | <b>5.52<sup>c</sup></b> |
| 3951       | 9        | x    | B     | A     | A     | A  | A       | A     | A       | A       | A     | A       | A       | A       | A       | A       | A        | A       | A                | A       | A       | A       | A     | A                    | 5.45 <sup>ab</sup>        | 4.62 <sup>c-h</sup>     | 6.40 <sup>a-g</sup>    | 5.95 <sup>a-c</sup>     |
| 5103       | 42       |      | B     | A     | A     | A  | A       | A     | A       | A       | A     | A       | A       | A       | A       | A       | A        | A       | A                | A       | A       | A       | A     | A                    | 5.56 <sup>a</sup>         | --                      | --                     | --                      |
| 4228       | 16       | x    | B     | B     | A     | A  | A       | A     | A       | A       | A     | A       | A       | A       | A       | A       | A        | A       | A                | A       | A       | A       | A     | A                    | 4.76 <sup>ab</sup>        | 4.89 <sup>a-f</sup>     | 6.50 <sup>a-f</sup>    | 6.25 <sup>a-c</sup>     |
| 3999       | 11       | x    | B     | B     | B     | A  | A       | A     | A       | A       | A     | A       | A       | A       | A       | A       | A        | A       | A                | A       | A       | A       | A     | A                    | 4.97 <sup>ab</sup>        | 4.21 <sup>gh</sup>      | 6.00 <sup>b-g</sup>    | 6.18 <sup>a-c</sup>     |
| 4945       | 35       |      | B     | B     | B     | A  | A       | A     | A       | A       | A     | A       | A       | A       | A       | A       | A        | A       | A                | A       | A       | A       | A     | A                    | 5.61 <sup>a</sup>         | --                      | --                     | --                      |
| 3892       | 8        | x    | B     | B     | B     | B  | A       | A     | A       | A       | A     | A       | A       | A       | A       | A       | A        | A       | A                | A       | A       | A       | A     | A                    | 5.59 <sup>a</sup>         | 5.17 <sup>a-c</sup>     | 6.80 <sup>a-c</sup>    | 6.54 <sup>a-c</sup>     |

Table S3, cont.

| Line Name | Genotype ID | 2010 | Genotype |       |       |    |         |       |         |         |       |         |         |         |         |         |          |         |       | Means Separation |         |         |       |                      |                           |                        |                        |                     |
|-----------|-------------|------|----------|-------|-------|----|---------|-------|---------|---------|-------|---------|---------|---------|---------|---------|----------|---------|-------|------------------|---------|---------|-------|----------------------|---------------------------|------------------------|------------------------|---------------------|
|           |             |      | TG194    | T0408 | SSR67 | J1 | At22570 | TG523 | At16710 | U340899 | CT182 | At22260 | At02870 | At44446 | At21690 | At44790 | cLEX4G10 | cLEB7L1 | TG147 | At14260          | At10050 | At04590 | TG400 | 09FD_120 Loc1&2 LEAF | 10FD-early_83 Loc1&2 LEAF | 10FD-late_83 Loc1 LEAF | 10FD-late_83 Loc2 LEAF |                     |
| 3969      | 10          | x    | B        | B     | B     | B  | B       | B     | A       | A       | A     | A       | A       | A       | A       | A       | A        | A       | A     | A                | A       | A       | A     | A                    | 5.77 <sup>a</sup>         | 5.05 <sup>a-d</sup>    | 6.70 <sup>a-d</sup>    | 6.71 <sup>ab</sup>  |
| 4257      | 17          |      | B        | B     | B     | B  | B       | B     | A       | A       | A     | A       | A       | A       | A       | A       | A        | A       | A     | A                | A       | A       | A     | A                    | 5.52 <sup>a</sup>         | --                     | --                     | --                  |
| 4940      | 34          |      | B        | B     | B     | B  | B       | B     | A       | A       | A     | A       | A       | A       | A       | A       | A        | A       | A     | A                | A       | A       | A     | A                    | 5.62 <sup>a</sup>         | --                     | --                     | --                  |
| 7717      | 110         | x    | B        | B     | B     | B  | B       | B     | B       | A       | A     | A       | A       | A       | A       | A       | A        | A       | A     | A                | A       | A       | A     | A                    | 5.69 <sup>a</sup>         | 4.90 <sup>a-f</sup>    | 6.40 <sup>a-g</sup>    | 6.95 <sup>a</sup>   |
| 7731      | 111         |      | B        | B     | B     | B  | B       | B     | B       | A       | A     | A       | A       | A       | A       | A       | A        | A       | A     | A                | A       | A       | A     | A                    | 5.60 <sup>a</sup>         | --                     | --                     | --                  |
| 4265      | 18          | x    | B        | B     | B     | B  | B       | B     | B       | B       | A     | A       | A       | A       | A       | A       | A        | A       | A     | A                | A       | A       | A     | A                    | 5.24 <sup>ab</sup>        | 4.75 <sup>a-h</sup>    | 6.40 <sup>a-g</sup>    | 6.66 <sup>a-c</sup> |
| 4290      | 19          |      | B        | B     | B     | B  | B       | B     | B       | B       | A     | A       | A       | A       | A       | A       | A        | A       | A     | A                | A       | A       | A     | A                    | 5.19 <sup>ab</sup>        | --                     | --                     | --                  |
| 5224      | 45          |      | B        | B     | B     | B  | B       | B     | B       | B       | A     | A       | A       | A       | A       | A       | A        | A       | A     | A                | A       | A       | A     | A                    | 5.77 <sup>a</sup>         | --                     | --                     | --                  |
| 7852      | 116         | x    | B        | B     | B     | B  | B       | B     | B       | B       | B     | A       | A       | A       | A       | A       | A        | A       | A     | A                | A       | A       | A     | A                    | 5.26 <sup>ab</sup>        | 4.62 <sup>c-h</sup>    | 6.10 <sup>a-g</sup>    | 6.66 <sup>a-c</sup> |
| 3827      | 6           | x    | B        | B     | B     | B  | B       | B     | B       | B       | B     | B       | A       | A       | A       | A       | A        | A       | A     | A                | A       | A       | A     | A                    | 5.26 <sup>ab</sup>        | 5.10 <sup>a-d</sup>    | 6.80 <sup>a-c</sup>    | 6.59 <sup>a-c</sup> |
| 4659      | 24          |      | B        | B     | B     | B  | B       | B     | B       | B       | B     | B       | A       | A       | A       | A       | A        | A       | A     | A                | A       | A       | A     | A                    | 5.39 <sup>ab</sup>        | --                     | --                     | --                  |
| 4305      | 20          | x    | B        | B     | B     | B  | B       | B     | B       | B       | B     | B       | B       | A       | A       | A       | A        | A       | A     | A                | A       | A       | A     | A                    | 4.98 <sup>ab</sup>        | 4.70 <sup>b-h</sup>    | 6.40 <sup>a-g</sup>    | 6.36 <sup>a-c</sup> |
| 7743      | 112         |      | B        | B     | B     | B  | B       | B     | B       | B       | B     | B       | B       | A       | A       | A       | A        | A       | A     | A                | A       | A       | A     | A                    | 5.46 <sup>ab</sup>        | --                     | --                     | --                  |
| 7766      | 113         | x    | B        | B     | B     | B  | B       | B     | B       | B       | B     | B       | B       | B       | B       | A       | A        | A       | A     | A                | A       | A       | A     | A                    | 5.45 <sup>ab</sup>        | 4.97 <sup>a-f</sup>    | 6.40 <sup>a-g</sup>    | 6.89 <sup>a</sup>   |
| 7868      | 117         | x    | B        | B     | B     | B  | B       | B     | B       | B       | B     | B       | B       | B       | B       | A       | A        | A       | A     | A                | A       | A       | A     | A                    | 5.38 <sup>ab</sup>        | 4.77 <sup>a-h</sup>    | 6.70 <sup>a-d</sup>    | 5.88 <sup>a-c</sup> |
| 4718      | 25          | x    | B        | B     | B     | B  | B       | B     | B       | B       | B     | B       | B       | B       | B       | B       | A        | A       | A     | A                | A       | A       | A     | A                    | 5.53 <sup>a</sup>         | 4.84 <sup>a-g</sup>    | 6.50 <sup>a-f</sup>    | 6.13 <sup>a-c</sup> |
| 4759      | 26          | x    | B        | B     | B     | B  | B       | B     | B       | B       | B     | B       | B       | B       | B       | B       | A        | A       | A     | A                | A       | A       | A     | A                    | 5.67 <sup>a</sup>         | 4.90 <sup>a-f</sup>    | 6.70 <sup>a-d</sup>    | 6.23 <sup>a-c</sup> |
| 5339      | 48          | x    | B        | B     | B     | B  | B       | B     | B       | B       | B     | B       | B       | B       | B       | B       | A        | A       | A     | A                | A       | A       | A     | A                    | 5.65 <sup>a</sup>         | 4.90 <sup>a-f</sup>    | 6.40 <sup>a-g</sup>    | 6.48 <sup>a-c</sup> |
| 4969      | 37          | x    | B        | B     | B     | B  | B       | B     | B       | B       | B     | B       | B       | B       | B       | B       | B        | B       | A     | A                | A       | A       | A     | A                    | 5.22 <sup>ab</sup>        | 4.66 <sup>c-h</sup>    | 6.40 <sup>a-g</sup>    | 5.93 <sup>a-c</sup> |
| 7799      | 114         |      | B        | B     | B     | B  | B       | B     | B       | B       | B     | B       | B       | B       | B       | B       | B        | B       | A     | A                | A       | A       | A     | A                    | 4.74 <sup>ab</sup>        | --                     | --                     | --                  |



Table S3, cont.

| Line Name        | Genotype ID | 2010 | Genotype |       |       |    |         |       |         |         |       |         |         |         |         |         |          |         |       | Means Separation |         |         |       |                      |                           |                        |                        |                     |                         |                     |
|------------------|-------------|------|----------|-------|-------|----|---------|-------|---------|---------|-------|---------|---------|---------|---------|---------|----------|---------|-------|------------------|---------|---------|-------|----------------------|---------------------------|------------------------|------------------------|---------------------|-------------------------|---------------------|
|                  |             |      | TG194    | T0408 | SSR67 | J1 | At22570 | TG523 | At16710 | U340899 | CT182 | At22260 | At02870 | At44446 | At21690 | At44790 | cLEX4G10 | cLEB7L1 | TG147 | At14260          | At10050 | At04590 | TG400 | 09FD_120 Loc1&2 LEAF | 10FD-early_83 Loc1&2 LEAF | 10FD-late_83 Loc1 LEAF | 10FD-late_83 Loc2 LEAF |                     |                         |                     |
| 4106             | 14          | x    | A        | A     | A     | A  | A       | A     | A       | A       | A     | A       | A       | A       | B       | B       | B        | B       | B     | B                | B       | B       | B     | B                    | B                         | B                      | 4.93 <sup>ab</sup>     | 4.16 <sup>h</sup>   | 5.90 <sup>c-g</sup>     | 6.00 <sup>a-c</sup> |
| 4925             | 33          | x    | A        | A     | A     | A  | A       | A     | A       | A       | A     | A       | A       | A       | A       | B       | B        | B       | B     | B                | B       | B       | B     | B                    | B                         | B                      | 5.19 <sup>ab</sup>     | 4.93 <sup>a-f</sup> | 6.90 <sup>ab</sup>      | 6.59 <sup>a-c</sup> |
| 4498             | 22          | x    | A        | A     | A     | A  | A       | A     | A       | A       | A     | A       | A       | A       | A       | A       | B        | B       | B     | B                | B       | B       | B     | B                    | B                         | B                      | 4.92 <sup>ab</sup>     | 5.04 <sup>a-d</sup> | 6.60 <sup>a-e</sup>     | 6.30 <sup>a-c</sup> |
| 3723             | 2           | x    | A        | A     | A     | A  | A       | A     | A       | A       | A     | A       | A       | A       | A       | A       | B        | B       | B     | B                | B       | B       | B     | B                    | B                         | B                      | 4.88 <sup>ab</sup>     | 4.34 <sup>f-h</sup> | 6.20 <sup>a-g</sup>     | 6.13 <sup>a-c</sup> |
| 4794             | 27          | x    | A        | A     | A     | A  | A       | A     | A       | A       | A     | A       | A       | A       | A       | A       | B        | B       | B     | B                | B       | B       | B     | B                    | B                         | B                      | 5.03 <sup>ab</sup>     | 4.76 <sup>a-h</sup> | 6.10 <sup>a-g</sup>     | 6.71 <sup>ab</sup>  |
| 4802             | 28          | x    | A        | A     | A     | A  | A       | A     | A       | A       | A     | A       | A       | A       | A       | A       | A        | B       | B     | B                | B       | B       | B     | B                    | B                         | B                      | 4.93 <sup>ab</sup>     | 5.03 <sup>a-d</sup> | 6.70 <sup>a-d</sup>     | 5.95 <sup>a-c</sup> |
| 5245             | 46          | x    | A        | A     | A     | A  | A       | A     | A       | A       | A     | A       | A       | A       | A       | A       | A        | B       | B     | B                | B       | B       | B     | B                    | B                         | B                      | 5.20 <sup>ab</sup>     | 4.76 <sup>a-h</sup> | 6.30 <sup>a-g</sup>     | 6.18 <sup>a-c</sup> |
| 3740             | 3           | x    | A        | A     | A     | A  | A       | A     | A       | A       | A     | A       | A       | A       | A       | A       | A        | A       | A     | B                | B       | B       | B     | B                    | B                         | B                      | 4.65 <sup>ab</sup>     | 4.51 <sup>d-h</sup> | 6.50 <sup>a-f</sup>     | 6.30 <sup>a-c</sup> |
| 5285             | 47          | x    | A        | A     | A     | A  | A       | A     | A       | A       | A     | A       | A       | A       | A       | A       | A        | A       | A     | B                | B       | B       | B     | B                    | B                         | B                      | 4.93 <sup>ab</sup>     | 4.73 <sup>b-h</sup> | 6.40 <sup>a-g</sup>     | 6.43 <sup>a-c</sup> |
| 3765             | 4           | x    | A        | A     | A     | A  | A       | A     | A       | A       | A     | A       | A       | A       | A       | A       | A        | A       | A     | A                | A       | A       | B     | B                    | B                         | B                      | 4.97 <sup>ab</sup>     | 4.48 <sup>d-h</sup> | 6.30 <sup>a-g</sup>     | 6.05 <sup>a-c</sup> |
| 4897             | 31          | x    | A        | A     | A     | A  | A       | A     | A       | A       | A     | A       | A       | A       | A       | A       | A        | A       | A     | A                | A       | A       | B     | B                    | B                         | B                      | 5.04 <sup>ab</sup>     | 4.47 <sup>d-h</sup> | <b>5.50<sup>g</sup></b> | 5.82 <sup>a-c</sup> |
| 5362             | 49          | x    | A        | A     | A     | A  | A       | A     | A       | A       | A     | A       | A       | A       | A       | A       | A        | A       | A     | A                | A       | A       | B     | B                    | B                         | B                      | 4.82 <sup>ab</sup>     | 4.82 <sup>a-g</sup> | 6.50 <sup>a-f</sup>     | 6.07 <sup>a-c</sup> |
| 4877             | 30          | x    | A        | A     | A     | A  | A       | A     | A       | A       | A     | A       | A       | A       | A       | A       | A        | A       | A     | A                | A       | A       | A     | A                    | B                         | B                      | 5.18 <sup>ab</sup>     | 4.82 <sup>a-g</sup> | 7.00 <sup>a</sup>       | 6.54 <sup>a-c</sup> |
| 8009             | 119         | x    | A        | A     | A     | A  | A       | A     | A       | A       | A     | A       | A       | A       | A       | A       | A        | A       | A     | A                | A       | A       | A     | A                    | B                         | B                      | 4.80 <sup>ab</sup>     | 4.69 <sup>b-h</sup> | 6.60 <sup>a-e</sup>     | 6.36 <sup>a-c</sup> |
| 3814             | 5           |      | A        | A     | A     | A  | A       | A     | A       | A       | A     | A       | A       | A       | A       | A       | A        | A       | A     | A                | A       | A       | A     | A                    | A                         | A                      | 5.98 <sup>a</sup>      | --                  | --                      | --                  |
| Means Separation |             |      |          |       |       |    |         |       |         |         |       |         |         |         |         |         |          |         |       |                  |         |         |       | *                    | *                         | *                      | *                      |                     |                         |                     |

Table S3, cont.

| Line Name  | Genotype<br>ID | 2010 | Means Separation   |                     |                   |                         |                         |                         |                         |                        |                    |                    |                     |                     |                     |
|------------|----------------|------|--------------------|---------------------|-------------------|-------------------------|-------------------------|-------------------------|-------------------------|------------------------|--------------------|--------------------|---------------------|---------------------|---------------------|
|            |                |      | GC_120 p7629 LEAF  | GC_120 p10353 LEAF  | GC_120 Sal10 LEAF | 09FD_120 Loc1&2 STEM    | 10FD-early_83 Loc1 STEM | 10FD-early_83 Loc2 STEM | 10FD-late_83 Loc1 STEM  | 10FD-late_83 Loc2 STEM | GC_120 p7629 STEM  | GC_120 p10353 STEM | GC_1_120 Sal10 STEM | GC-2_120 Sal10 STEM | GC-3_120 Sal10 STEM |
| Hyp45-A    | 121            | x    | 3.75 <sup>a</sup>  | 4.45 <sup>a</sup>   | 4.08              | 3.38 <sup>ab</sup>      | 3.78 <sup>b-e</sup>     | 3.02 <sup>a-d</sup>     | 4.90 <sup>a</sup>       | 4.79 <sup>ab</sup>     | 2.26 <sup>a</sup>  | 2.45               | 2.03                | 2.45                | 1.77 <sup>ab</sup>  |
| Hyp45-B    | 122            |      | --                 | --                  | --                | 3.37 <sup>a-c</sup>     | --                      | --                      | --                      | --                     | --                 | --                 | --                  | --                  | --                  |
| E6203-A    | 123            | x    | --                 | --                  | --                | 2.61 <sup>bc</sup>      | 3.68 <sup>c-e</sup>     | 2.70 <sup>b-d</sup>     | 4.69 <sup>ab</sup>      | 4.53 <sup>a-d</sup>    | --                 | --                 | --                  | --                  | --                  |
| E6203-B    | 124            | x    | 3.41 <sup>ab</sup> | 4.25 <sup>a-c</sup> | 3.87              | 2.64 <sup>bc</sup>      | 3.78 <sup>b-e</sup>     | 2.70 <sup>b-d</sup>     | 4.56 <sup>ab</sup>      | 4.18 <sup>a-d</sup>    | 1.80 <sup>ab</sup> | 2.19               | 1.76                | 2.22                | 1.70 <sup>ab</sup>  |
| E6203-C    | 129            | x    | --                 | --                  | --                | --                      | 3.64 <sup>c-e</sup>     | 2.75 <sup>b-d</sup>     | 4.71 <sup>ab</sup>      | 4.62 <sup>a-d</sup>    | --                 | --                 | --                  | --                  | --                  |
| E6203-D    | 130            | x    | --                 | --                  | --                | --                      | 3.56 <sup>c-e</sup>     | 2.38 <sup>de</sup>      | 4.47 <sup>ab</sup>      | 4.33 <sup>a-d</sup>    | --                 | --                 | --                  | --                  | --                  |
| LB11-NIL-A | 126            | x    | 3.15 <sup>b</sup>  | 3.55 <sup>bc</sup>  | 3.47              | 2.75 <sup>a-c</sup>     | 3.64 <sup>c-e</sup>     | 2.66 <sup>b-d</sup>     | 4.21 <sup>ab</sup>      | 3.88 <sup>b-d</sup>    | 1.34 <sup>b</sup>  | 1.77               | 1.49                | 2.25                | 1.66 <sup>b</sup>   |
| LB11-NIL-B | 128            | x    | --                 | --                  | --                | --                      | 3.62 <sup>c-e</sup>     | 2.50 <sup>cd</sup>      | <b>4.07<sup>b</sup></b> | 3.79 <sup>cd</sup>     | --                 | --                 | --                  | --                  | --                  |
| 3951       | 9              | x    | 3.83 <sup>ab</sup> | 4.80 <sup>a-c</sup> | 4.29              | 2.95 <sup>a-c</sup>     | 3.59 <sup>c-e</sup>     | 2.85 <sup>a-d</sup>     | 4.26 <sup>ab</sup>      | 3.83 <sup>cd</sup>     | 1.93 <sup>ab</sup> | 2.42               | 2.39                | 3.05                | 1.68 <sup>ab</sup>  |
| 5103       | 42             |      | 3.25 <sup>ab</sup> | 3.43 <sup>a-c</sup> | 4.62              | <b>2.33<sup>c</sup></b> | --                      | --                      | --                      | --                     | 1.53 <sup>ab</sup> | 1.47               | 2.42                | 2.84                | 1.93 <sup>ab</sup>  |
| 4228       | 16             | x    | 3.00 <sup>ab</sup> | 3.75 <sup>a-c</sup> | 4.10              | 2.84 <sup>a-c</sup>     | 3.41 <sup>c-e</sup>     | <b>1.27<sup>e</sup></b> | 4.36 <sup>ab</sup>      | 3.96 <sup>b-d</sup>    | 1.90 <sup>ab</sup> | 1.79               | 1.44                | 3.81                | 0.86 <sup>b</sup>   |
| 3999       | 11             | x    | 3.29 <sup>ab</sup> | 4.48 <sup>a-c</sup> | 4.33              | 2.90 <sup>a-c</sup>     | <b>3.26<sup>e</sup></b> | 2.28 <sup>de</sup>      | 4.28 <sup>ab</sup>      | 3.91 <sup>b-d</sup>    | 1.69 <sup>ab</sup> | 2.34               | 1.53                | 2.01                | 1.95 <sup>ab</sup>  |
| 4945       | 35             |      | 3.64 <sup>ab</sup> | 4.12 <sup>a-c</sup> | 4.16              | 2.92 <sup>a-c</sup>     | --                      | --                      | --                      | --                     | 1.31 <sup>ab</sup> | 2.10               | 2.19                | 2.25                | 1.41 <sup>ab</sup>  |
| 3892       | 8              | x    | 3.21 <sup>ab</sup> | 4.43 <sup>a-c</sup> | 4.55              | 2.69 <sup>bc</sup>      | 3.53 <sup>c-e</sup>     | 2.10 <sup>de</sup>      | 4.56 <sup>ab</sup>      | 4.11 <sup>a-d</sup>    | 1.70 <sup>ab</sup> | 2.41               | 2.34                | 2.74                | 1.78 <sup>ab</sup>  |



Table S3, cont.

| Line Name | Genotype ID | 2010 | Means Separation   |                         |                   |                      |                         |                         |                        |                        |                    |                    |                     |                     |                         |
|-----------|-------------|------|--------------------|-------------------------|-------------------|----------------------|-------------------------|-------------------------|------------------------|------------------------|--------------------|--------------------|---------------------|---------------------|-------------------------|
|           |             |      | GC_120 p7629 LEAF  | GC_120 p10353 LEAF      | GC_120 Sal10 LEAF | 09FD_120 Loc1&2 STEM | 10FD-early_83 Loc1 STEM | 10FD-early_83 Loc2 STEM | 10FD-late_83 Loc1 STEM | 10FD-late_83 Loc2 STEM | GC_120 p7629 STEM  | GC_120 p10353 STEM | GC-1_120 Sal10 STEM | GC-2_120 Sal10 STEM | GC-3_120 Sal10 STEM     |
| 3969      | 10          | x    | 3.59 <sup>ab</sup> | 3.88 <sup>a-c</sup>     | 3.44              | 3.55 <sup>ab</sup>   | 3.70 <sup>c-e</sup>     | 2.48 <sup>cd</sup>      | 4.69 <sup>ab</sup>     | 4.46 <sup>a-d</sup>    | 2.14 <sup>ab</sup> | 1.77               | 1.02                | 2.09                | 2.32 <sup>ab</sup>      |
| 4257      | 17          |      | 3.62 <sup>ab</sup> | 4.43 <sup>a-c</sup>     | 4.77              | 3.22 <sup>a-c</sup>  | --                      | --                      | --                     | --                     | 2.01 <sup>ab</sup> | 2.42               | 2.83                | 3.25                | 2.19 <sup>ab</sup>      |
| 4940      | 34          |      | 3.53 <sup>ab</sup> | 4.06 <sup>a-c</sup>     | 4.15              | 2.59 <sup>bc</sup>   | --                      | --                      | --                     | --                     | 1.55 <sup>ab</sup> | 2.39               | 1.81                | 2.49                | 2.32 <sup>ab</sup>      |
| 7717      | 110         | x    | 3.66 <sup>ab</sup> | 3.90 <sup>a-c</sup>     | 3.38              | 3.26 <sup>a-c</sup>  | 3.62 <sup>c-e</sup>     | 2.77 <sup>b-d</sup>     | 4.71 <sup>ab</sup>     | 4.70 <sup>a-c</sup>    | 2.30 <sup>ac</sup> | 2.18               | 1.61                | 1.89                | 2.28 <sup>ab</sup>      |
| 7731      | 111         |      | 3.66 <sup>ab</sup> | 4.35 <sup>a-c</sup>     | 3.90              | 3.31 <sup>a-c</sup>  | --                      | --                      | --                     | --                     | 1.96 <sup>ab</sup> | 2.88               | 1.44                | 2.29                | 1.85 <sup>ab</sup>      |
| 4265      | 18          | x    | 3.26 <sup>ab</sup> | 4.05 <sup>a-c</sup>     | 3.88              | 3.21 <sup>a-c</sup>  | 3.59 <sup>c-e</sup>     | 2.80 <sup>b-d</sup>     | 4.68 <sup>ab</sup>     | 4.79 <sup>ab</sup>     | 1.67 <sup>ab</sup> | 2.09               | 1.82                | 2.59                | 1.14 <sup>ab</sup>      |
| 4290      | 19          |      | 3.21 <sup>ab</sup> | 4.00 <sup>a-c</sup>     | 4.53              | 2.53 <sup>bc</sup>   | --                      | --                      | --                     | --                     | 1.62 <sup>ab</sup> | 2.02               | 1.51                | 3.33                | 2.25 <sup>ab</sup>      |
| 5224      | 45          |      | 3.30 <sup>ab</sup> | 4.24 <sup>a-c</sup>     | 3.75              | 2.60 <sup>bc</sup>   | --                      | --                      | --                     | --                     | 1.70 <sup>ab</sup> | 2.10               | 1.93                | 3.29                | 1.34 <sup>ab</sup>      |
| 7852      | 116         | x    | 2.94 <sup>ab</sup> | 3.55 <sup>a-c</sup>     | 3.22              | 3.40 <sup>ab</sup>   | 3.94 <sup>a-c</sup>     | 2.70 <sup>b-d</sup>     | 4.40 <sup>ab</sup>     | 3.78 <sup>cd</sup>     | 1.43 <sup>ab</sup> | 1.91               | 0.90                | 1.49                | 1.01 <sup>b</sup>       |
| 3827      | 6           | x    | 3.90 <sup>ab</sup> | 4.17 <sup>a-c</sup>     | 4.57              | 3.02 <sup>a-c</sup>  | 3.69 <sup>c-e</sup>     | 3.02 <sup>a-d</sup>     | 4.85 <sup>a</sup>      | 4.79 <sup>ab</sup>     | 2.07 <sup>ab</sup> | 2.29               | 2.13                | 3.39                | 2.25 <sup>ab</sup>      |
| 4659      | 24          |      | 3.20 <sup>ab</sup> | <b>3.00<sup>c</sup></b> | 3.49              | 2.91 <sup>a-c</sup>  | --                      | --                      | --                     | --                     | 1.83 <sup>ab</sup> | <b>1.20</b>        | 2.41                | 2.86                | 0.79 <sup>b</sup>       |
| 4305      | 20          | x    | 3.48 <sup>ab</sup> | 4.16 <sup>a-c</sup>     | 4.58              | 2.56 <sup>bc</sup>   | 3.78 <sup>b-e</sup>     | 2.85 <sup>a-d</sup>     | 4.52 <sup>ab</sup>     | 4.13 <sup>a-d</sup>    | 2.00 <sup>ab</sup> | 2.11               | 2.48                | 3.78                | 2.52 <sup>ab</sup>      |
| 7743      | 112         |      | 3.61 <sup>ab</sup> | 4.04 <sup>a-c</sup>     | 4.98              | 2.98 <sup>a-c</sup>  | --                      | --                      | --                     | --                     | 1.97 <sup>ab</sup> | 2.22               | 1.75                | 2.44                | 2.32 <sup>ab</sup>      |
| 7766      | 113         | x    | 3.88 <sup>ab</sup> | 4.04 <sup>a-c</sup>     | 3.73              | 2.88 <sup>a-c</sup>  | 3.59 <sup>c-e</sup>     | 2.30 <sup>de</sup>      | 4.74 <sup>ab</sup>     | 4.62 <sup>a-d</sup>    | 2.18 <sup>ab</sup> | 2.12               | 2.29                | 2.17                | <b>0.55<sup>b</sup></b> |
| 7868      | 117         | x    | 3.27 <sup>ab</sup> | 4.03 <sup>a-c</sup>     | 3.02              | 2.64 <sup>bc</sup>   | 3.52 <sup>c-e</sup>     | 2.63 <sup>cd</sup>      | 4.41 <sup>ab</sup>     | 3.86 <sup>b-d</sup>    | 1.87 <sup>ab</sup> | 2.63               | 0.87                | 1.58                | 1.95 <sup>ab</sup>      |
| 4718      | 25          | x    | 3.26 <sup>ab</sup> | 3.79 <sup>a-c</sup>     | 4.48              | 2.76 <sup>a-c</sup>  | 3.71 <sup>c-e</sup>     | 2.60 <sup>cd</sup>      | 4.66 <sup>ab</sup>     | 4.20 <sup>a-d</sup>    | 1.33 <sup>ab</sup> | 1.88               | 1.54                | 2.94                | 1.26 <sup>ab</sup>      |
| 4759      | 26          | x    | 3.48 <sup>ab</sup> | 3.35 <sup>a-c</sup>     | 2.97              | 3.41 <sup>ab</sup>   | 3.59 <sup>c-e</sup>     | 2.92 <sup>a-d</sup>     | 4.54 <sup>ab</sup>     | 4.27 <sup>a-d</sup>    | 2.14 <sup>ab</sup> | 2.03               | 1.44                | 1.37                | 1.04 <sup>ab</sup>      |
| 5339      | 48          | x    | 3.17 <sup>ab</sup> | 4.30 <sup>a-c</sup>     | 3.53              | 2.92 <sup>a-c</sup>  | 3.68 <sup>c-e</sup>     | 2.55 <sup>cd</sup>      | 4.60 <sup>ab</sup>     | 4.34 <sup>a-d</sup>    | 1.48 <sup>ab</sup> | 2.16               | 1.32                | 3.48                | 1.28 <sup>ab</sup>      |
| 4969      | 37          | x    | 3.02 <sup>ab</sup> | 3.30 <sup>a-c</sup>     | 3.62              | 3.04 <sup>a-c</sup>  | 3.36 <sup>de</sup>      | 2.98 <sup>a-d</sup>     | 4.58 <sup>ab</sup>     | 4.29 <sup>a-d</sup>    | 1.51 <sup>ab</sup> | 1.65               | 1.15                | 2.36                | 0.63 <sup>b</sup>       |
| 7799      | 114         |      | 3.31 <sup>ab</sup> | 3.83 <sup>a-c</sup>     | 3.58              | 3.16 <sup>a-c</sup>  | --                      | --                      | --                     | --                     | 1.60 <sup>ab</sup> | 2.09               | 2.34                | 2.12                | 0.88 <sup>b</sup>       |

Table S3, cont.

| Line Name | Genotype ID | 2010 | Means Separation   |                     |                   |                      |                         |                         |                        |                        |                          |                    |                     |                     |                     |
|-----------|-------------|------|--------------------|---------------------|-------------------|----------------------|-------------------------|-------------------------|------------------------|------------------------|--------------------------|--------------------|---------------------|---------------------|---------------------|
|           |             |      | GC_120 p7629 LEAF  | GC_120 p10353 LEAF  | GC_120 Sal10 LEAF | 09FD_120 Loc1&2 STEM | 10FD-early_83 Loc1 STEM | 10FD-early_83 Loc2 STEM | 10FD-late_83 Loc1 STEM | 10FD-late_83 Loc2 STEM | GC_120 p7629 STEM        | GC_120 p10353 STEM | GC_1_120 Sal10 STEM | GC_2_120 Sal10 STEM | GC_3_120 Sal10 STEM |
| 3845      | 7           | x    | 3.23 <sup>ab</sup> | 3.94 <sup>a-c</sup> | 3.48              | 3.31 <sup>a-c</sup>  | 3.74 <sup>c-c</sup>     | 2.95 <sup>b-d</sup>     | 4.71 <sup>ab</sup>     | 4.55 <sup>b-d</sup>    | 1.50 <sup>ab</sup>       | 2.10               | 1.81                | 1.92                | 2.14 <sup>ab</sup>  |
| 4961      | 36          |      | 3.18 <sup>ab</sup> | 4.14 <sup>a-c</sup> | 4.17              | 2.96 <sup>a-c</sup>  | --                      | --                      | --                     | --                     | 1.68 <sup>ab</sup>       | 2.32               | 3.36                | 1.72                | 1.78 <sup>ab</sup>  |
| 7952      | 118         |      | 3.14 <sup>ab</sup> | 4.00 <sup>a-c</sup> | 3.41              | 3.25 <sup>a-c</sup>  | --                      | --                      | --                     | --                     | 1.97 <sup>ab</sup>       | 1.94               | 2.70                | <b>0.91</b>         | 2.28 <sup>ab</sup>  |
| 5385      | 50          | x    | 2.96 <sup>ab</sup> | 4.15 <sup>a-c</sup> | 4.06              | 3.16 <sup>a-c</sup>  | 3.64 <sup>c-e</sup>     | 2.65 <sup>b-d</sup>     | 4.38 <sup>ab</sup>     | 3.94 <sup>b-d</sup>    | 1.36 <sup>ab</sup>       | 2.58               | 1.85                | 3.70                | 1.05 <sup>ab</sup>  |
| 5422      | 51          |      | 3.46 <sup>ab</sup> | 4.21 <sup>a-c</sup> | 4.37              | 2.80 <sup>a-c</sup>  | --                      | --                      | --                     | --                     | 2.04 <sup>ab</sup>       | 2.14               | 2.55                | 3.45                | 2.42 <sup>ab</sup>  |
| 4993      | 38          | x    | 3.19 <sup>ab</sup> | 3.93 <sup>a-c</sup> | 3.61              | 3.47 <sup>ab</sup>   | 3.82 <sup>b-e</sup>     | 3.82 <sup>ab</sup>      | 4.74 <sup>ab</sup>     | 4.71 <sup>a-c</sup>    | 2.01 <sup>ab</sup>       | 2.84               | 2.43                | 3.33                | 2.06 <sup>ab</sup>  |
| 5010      | 39          | x    | 3.64 <sup>ab</sup> | 3.67 <sup>a-c</sup> | 3.67              | 2.87 <sup>a-c</sup>  | 3.64 <sup>c-e</sup>     | 2.80 <sup>b-d</sup>     | 4.52 <sup>ab</sup>     | 4.17 <sup>a-d</sup>    | 1.30 <sup>ab</sup>       | 1.20               | 1.90                | 1.36                | 1.60 <sup>ab</sup>  |
| 5015      | 40          |      | 3.59 <sup>ab</sup> | 4.94 <sup>ab</sup>  | 4.09              | 2.82 <sup>a-c</sup>  | --                      | --                      | --                     | --                     | 1.42 <sup>ab</sup>       | 2.60               | 1.78                | 1.90                | 2.28 <sup>ab</sup>  |
| 5055      | 41          | x    | 3.31 <sup>ab</sup> | 4.03 <sup>a-c</sup> | 3.74              | 3.21 <sup>a-c</sup>  | 3.78 <sup>b-e</sup>     | 2.83 <sup>b-d</sup>     | 4.46 <sup>ab</sup>     | 3.96 <sup>b-d</sup>    | 1.64 <sup>ab</sup>       | 2.43               | 1.03                | 2.96                | 2.17 <sup>ab</sup>  |
| 4056      | 13          | x    | 3.52 <sup>ab</sup> | 4.43 <sup>a-c</sup> | 3.88              | 3.74 <sup>a</sup>    | 4.42 <sup>a</sup>       | 4.02 <sup>a</sup>       | 4.98 <sup>a</sup>      | 4.95 <sup>a</sup>      | 1.97 <sup>ab</sup>       | 2.40               | 1.89                | 2.75                | 2.85 <sup>ab</sup>  |
| 4558      | 23          |      | 3.37 <sup>ab</sup> | 4.33 <sup>a-c</sup> | 3.91              | 3.38 <sup>ab</sup>   | --                      | --                      | --                     | --                     | 1.88 <sup>ab</sup>       | 2.32               | 3.82                | 2.36                | 1.08 <sup>ab</sup>  |
| 4018      | 12          | x    | 3.50 <sup>ab</sup> | 4.65 <sup>a-c</sup> | 4.14              | 2.83 <sup>a-c</sup>  | 3.80 <sup>b-e</sup>     | 2.95 <sup>a-d</sup>     | 4.41 <sup>ab</sup>     | 4.25 <sup>a-d</sup>    | 1.79 <sup>ab</sup>       | 2.26               | 0.94                | 4.19                | 2.29 <sup>ab</sup>  |
| 4861      | 29          |      | 3.12 <sup>ab</sup> | 3.46 <sup>a-c</sup> | 4.24              | 2.98 <sup>a-c</sup>  | --                      | --                      | --                     | --                     | 1.80 <sup>ab</sup>       | 1.64               | 1.48                | 1.89                | 2.48 <sup>ab</sup>  |
| 5162      | 43          | x    | 3.67 <sup>ab</sup> | 4.09 <sup>a-c</sup> | 3.49              | 3.41 <sup>ab</sup>   | 4.32 <sup>ab</sup>      | 3.65 <sup>a-c</sup>     | 4.71 <sup>ab</sup>     | 4.52 <sup>a-d</sup>    | 1.94 <sup>ab</sup>       | 2.51               | 2.53                | 1.47                | 2.45 <sup>ab</sup>  |
| 7826      | 115         |      | 3.25 <sup>ab</sup> | 4.05 <sup>a-c</sup> | 3.67              | 3.52 <sup>ab</sup>   | --                      | --                      | --                     | --                     | 1.28 <sup>ab</sup>       | 2.19               | 0.83                | 1.87                | 2.95 <sup>ab</sup>  |
| 4182      | 15          | x    | 3.61 <sup>ab</sup> | 4.06 <sup>a-c</sup> | 4.13              | 2.93 <sup>a-c</sup>  | 3.78 <sup>b-e</sup>     | 2.83 <sup>b-d</sup>     | 4.40 <sup>ab</sup>     | 4.15 <sup>a-d</sup>    | 2.28 <sup>ab</sup>       | 2.31               | 2.18                | 3.13                | 1.65 <sup>ab</sup>  |
| 5186      | 44          |      | 3.59 <sup>ab</sup> | 4.51 <sup>a-c</sup> | 4.19              | 3.22 <sup>a-c</sup>  | --                      | --                      | --                     | --                     | 2.07 <sup>ab</sup>       | 2.80               | 1.64                | 3.61                | 1.79 <sup>ab</sup>  |
| 8032      | 120         | x    | 3.11 <sup>ab</sup> | 3.77 <sup>a-c</sup> | 3.05              | 3.00 <sup>a-c</sup>  | 3.60 <sup>c-e</sup>     | 2.05 <sup>de</sup>      | 4.29 <sup>ab</sup>     | 3.88 <sup>b-d</sup>    | 1.54 <sup>ab</sup>       | 1.85               | 2.69                | 1.87                | 2.33 <sup>ab</sup>  |
| 4442      | 21          | x    | 3.71 <sup>ab</sup> | 4.51 <sup>a-c</sup> | 3.8               | 3.18 <sup>a-c</sup>  | 3.76 <sup>b-e</sup>     | 3.07 <sup>a-d</sup>     | 4.60 <sup>ab</sup>     | 4.43 <sup>a-d</sup>    | 2.21 <sup>ab</sup>       | 2.22               | 1.14                | 3.05                | 3.20 <sup>ab</sup>  |
| 4922      | 32          |      | 3.67 <sup>ab</sup> | 4.59 <sup>a-c</sup> | 3.63              | 2.71 <sup>bc</sup>   | --                      | --                      | --                     | --                     | 2.04 <sup>ab</sup>       | 2.25               | 1.94                | 2.62                | 2.22 <sup>ab</sup>  |
| 3688      | 1           | x    | 3.14 <sup>ab</sup> | 4.15 <sup>a-c</sup> | 4.46              | 2.75 <sup>a-c</sup>  | 3.38 <sup>c-e</sup>     | 2.73 <sup>b-d</sup>     | 4.33 <sup>ab</sup>     | 4.02 <sup>a-d</sup>    | <b>1.25<sup>bc</sup></b> | 2.60               | 2.88                | 2.32                | 3.08 <sup>ab</sup>  |

Table S3, cont.

| Line Name               | Genotype ID | 2010 | Means Separation   |                     |                   |                      |                         |                         |                        |                         |                    |                    |                     |                     |                     |
|-------------------------|-------------|------|--------------------|---------------------|-------------------|----------------------|-------------------------|-------------------------|------------------------|-------------------------|--------------------|--------------------|---------------------|---------------------|---------------------|
|                         |             |      | GC_120 p7629 LEAF  | GC_120 p10353 LEAF  | GC_120 Sal10 LEAF | 09FD_120 Loc1&2 STEM | 10FD-early_83 Loc1 STEM | 10FD-early_83 Loc2 STEM | 10FD-late_83 Loc1 STEM | 10FD-late_83 Loc2 STEM  | GC_120 p7629 STEM  | GC_120 p10353 STEM | GC-1_120 Sal10 STEM | GC-2_120 Sal10 STEM | GC-3_120 Sal10 STEM |
| 4106                    | 14          | x    | 2.72 <sup>b</sup>  | 3.18 <sup>a-c</sup> | 3.00              | 2.73 <sup>a-c</sup>  | 3.62 <sup>c-e</sup>     | 2.55 <sup>cd</sup>      | 4.35 <sup>ab</sup>     | 3.93 <sup>b-d</sup>     | 1.29 <sup>bc</sup> | 1.33               | 1.88                | 2.54                | 1.44 <sup>ab</sup>  |
| 4925                    | 33          | x    | 3.44 <sup>ab</sup> | 4.34 <sup>a-c</sup> | 4.06              | 2.72 <sup>a-c</sup>  | 3.64 <sup>c-e</sup>     | 2.95 <sup>a-d</sup>     | 4.71 <sup>ab</sup>     | 4.46 <sup>a-d</sup>     | 1.84 <sup>ab</sup> | 2.45               | 1.92                | 3.83                | 1.66 <sup>ab</sup>  |
| 4498                    | 22          | x    | 2.99 <sup>ab</sup> | 3.16 <sup>a-c</sup> | 3.38              | 3.16 <sup>a-c</sup>  | 3.72 <sup>c-e</sup>     | 2.17 <sup>de</sup>      | 4.58 <sup>ab</sup>     | 4.02 <sup>a-d</sup>     | 1.46 <sup>ab</sup> | 1.72               | 0.62                | 2.50                | 1.62 <sup>ab</sup>  |
| 3723                    | 2           | x    | 3.44 <sup>ab</sup> | 4.53 <sup>a-c</sup> | 3.85              | 2.87 <sup>a-c</sup>  | 3.58 <sup>c-e</sup>     | 2.32 <sup>de</sup>      | 4.21 <sup>ab</sup>     | 3.73 <sup>d</sup>       | 1.78 <sup>ab</sup> | 2.70               | <b>0.54</b>         | 3.11                | 2.20 <sup>ab</sup>  |
| 4794                    | 27          | x    | 3.18 <sup>ab</sup> | 4.13 <sup>a-c</sup> | 4.49              | 2.84 <sup>a-c</sup>  | 3.39 <sup>c-e</sup>     | 2.42 <sup>de</sup>      | 4.52 <sup>ab</sup>     | 4.37 <sup>a-d</sup>     | 1.43 <sup>ab</sup> | 2.67               | 1.69                | 3.36                | 2.73 <sup>ab</sup>  |
| 4802                    | 28          | x    | 3.66 <sup>ab</sup> | 3.95 <sup>a-c</sup> | 4.52              | 3.37 <sup>ab</sup>   | 3.90 <sup>a-d</sup>     | 2.95 <sup>a-d</sup>     | 4.63 <sup>ab</sup>     | 4.36 <sup>a-d</sup>     | 2.34 <sup>ab</sup> | 2.59               | 1.92                | 3.12                | 3.71 <sup>a</sup>   |
| 5245                    | 46          | x    | 3.54 <sup>ab</sup> | 4.47 <sup>a-c</sup> | 3.83              | 2.95 <sup>a-c</sup>  | 3.48 <sup>c-e</sup>     | 2.37 <sup>de</sup>      | 4.27 <sup>ab</sup>     | 3.89 <sup>b-d</sup>     | 2.17 <sup>ab</sup> | 2.07               | 2.57                | 2.06                | 1.97 <sup>ab</sup>  |
| 3740                    | 3           | x    | 3.58 <sup>ab</sup> | 4.00 <sup>a-c</sup> | 3.77              | 3.00 <sup>a-c</sup>  | 3.44 <sup>c-e</sup>     | 2.08 <sup>de</sup>      | 4.43 <sup>ab</sup>     | <b>3.70<sup>d</sup></b> | 2.05 <sup>ab</sup> | 2.11               | 1.94                | 2.59                | 2.85 <sup>ab</sup>  |
| 5285                    | 47          | x    | 3.39 <sup>ab</sup> | 3.99 <sup>a-c</sup> | 4.23              | 3.27 <sup>a-c</sup>  | 3.84 <sup>b-d</sup>     | 3.15 <sup>a-d</sup>     | 4.60 <sup>ab</sup>     | 4.32 <sup>a-d</sup>     | 2.31 <sup>ab</sup> | 2.43               | 1.73                | 2.89                | 3.12 <sup>ab</sup>  |
| 3765                    | 4           | x    | 3.42 <sup>ab</sup> | 4.08 <sup>a-c</sup> | 4.16              | 3.09 <sup>a-c</sup>  | 3.76 <sup>b-e</sup>     | 3.09 <sup>a-d</sup>     | 4.52 <sup>ab</sup>     | 4.12 <sup>a-d</sup>     | 2.05 <sup>ab</sup> | 2.20               | 3.35                | 3.11                | 0.72 <sup>b</sup>   |
| 4897                    | 31          | x    | 3.42 <sup>ab</sup> | 3.80 <sup>a-c</sup> | 4.15              | 3.17 <sup>a-c</sup>  | 3.74 <sup>c-e</sup>     | 3.23 <sup>a-d</sup>     | 4.32 <sup>ab</sup>     | 3.98 <sup>b-d</sup>     | 1.98 <sup>ab</sup> | 2.12               | 1.45                | 2.18                | 2.35 <sup>ab</sup>  |
| 5362                    | 49          | x    | 3.70 <sup>ab</sup> | 4.02 <sup>a-c</sup> | 3.86              | 3.27 <sup>a-c</sup>  | 3.66 <sup>c-e</sup>     | 2.93 <sup>a-d</sup>     | 4.43 <sup>ab</sup>     | 3.88 <sup>b-d</sup>     | 2.31 <sup>ab</sup> | 2.12               | 2.42                | 3.60                | 1.03 <sup>b</sup>   |
| 4877                    | 30          | x    | 3.82 <sup>ab</sup> | 4.12 <sup>a-c</sup> | 3.74              | 2.93 <sup>a-c</sup>  | 3.79 <sup>b-e</sup>     | 2.53 <sup>cd</sup>      | 4.78 <sup>ab</sup>     | 4.53 <sup>a-d</sup>     | 2.05 <sup>ab</sup> | 2.46               | 2.58                | 2.55                | 1.20 <sup>ab</sup>  |
| 8009                    | 119         | x    | 3.28 <sup>ab</sup> | 4.55 <sup>a-c</sup> | 3.72              | 3.25 <sup>a-c</sup>  | 3.64 <sup>c-e</sup>     | 2.78 <sup>b-d</sup>     | 4.49 <sup>ab</sup>     | 4.27 <sup>a-d</sup>     | 1.55 <sup>ab</sup> | 2.94               | 1.47                | 3.62                | 2.14 <sup>ab</sup>  |
| 3814                    | 5           |      | 3.53 <sup>ab</sup> | 3.79 <sup>a-c</sup> | 4.31              | 2.97 <sup>a-c</sup>  | --                      | --                      | --                     | --                      | 1.76 <sup>ab</sup> | 1.54               | 1.93                | 3.18                | 1.81 <sup>ab</sup>  |
| <b>Means Separation</b> |             |      | *                  | *                   | ns                | *                    | *                       | *                       | *                      | *                       | *                  | ns                 | ns                  | ns                  | *                   |

<sup>a</sup> In Proc MIXED in SAS, means separation are calculated using both the difference between means and the number of replications for each entry. Therefore, letter rankings are not always contiguous.

A double dash (--) indicates that the line was not included in the experiment.

An asterisk (\*) indicates significance at  $P \leq 0.05$  and "ns" indicates not significant.
