# Supplementary material for: Fractionation, Stability, and Isolate-Specificity of QTL for Resistance to Phytophthora infestans in Cultivated Tomato (Solanum lycopersicum)
Source: PubMed Central journal article supplement (PMC3464107; doi:10.1534/g3.112.003459), 2012-10-01
Supplement: supp_2.10.1145_TableS1.pdf [file supp_2.10.1145_TableS1.pdf]

**Table S1 Markers used for chromosome 5 and chromosome 11 introgressed regions**

All markers are PCR-based and co-dominant unless otherwise noted. Position refers to the position in cM on the genetic maps of the introgressed regions from *S. habrochaites* (not the position on the entire chromosome). In the table, A and B refer to the band sizes for the *S. lycopersicum* and *S. habrochaites* alleles, respectively.

| Chr  | Marker                            | Position | Forward Primer              | Reverse Primer              | Tm <sup>a</sup> | Mg                | Restriction    | Band sizes (A, B)       |
|------|-----------------------------------|----------|-----------------------------|-----------------------------|-----------------|-------------------|----------------|-------------------------|
|      |                                   |          |                             |                             |                 | conc <sup>b</sup> | enzyme         |                         |
| Chr5 | <b>TG358</b>                      | 0.0      | CAACTTTTCCAGGTTCAATTTCTC    | ACACCTACATGCTACTAAGGGGTC    | 53              | 2.0               | <i>HhaI</i>    | 250, 300                |
|      | <b>At1g10500</b>                  | 0.0      | ACGATTCAATCATCGAGTACAATGG   | AGCAGTAAACGATTTTCCACAACCAC  | 55              | 1.5               | <i>HaeIII</i>  | 1000, 800               |
|      | <b>T0536</b>                      | 0.3      | GAGTTCGTAAGACTGATGG         | ATTTCACTTATGCAGGTACG        | 55              | 1.5               | <i>MnII</i>    | 300, 410                |
|      | <b>cLEX-13-G5</b>                 | 1.5      | GCAGCATTTAGGCTCAGAGG        | TTCTCAGTGGATCGTGATGG        | 55              | 1.5               | <i>HinfI</i>   | 320, 400                |
|      | <b>U221402</b>                    | 1.8      | AAGCCTCCTTGACAAATGCATATAG   | AGATATAGCTACAGTGGCAGCTTCATC | 55              | 1.5               | <i>DdeI</i>    | 450, 650                |
|      | <b>At3g55800</b>                  | 2.7      | TTTGAATCAAGCTCATTATTTGG     | AGCTGTTCTCCACAAGAAGCTG      | 55              | 1.5               | <i>DpnII</i>   | 200, 320                |
|      | <b>At2g39950 F2/R2</b>            | 3.0      | TTGGCTGAGTTAACTGGAAT        | AATGTGGAGTCCAAGTGGAG        | 55              | 1.5               | <i>DpnII</i>   | 170 and 180, 370        |
|      | <b>TG23</b>                       | 5.5      | ATGAACTTCCCCCTTAAGTATCTG    | CCTTATCCATAGGTTCCAAAGG      | 57              | 2.0               | <i>Asel</i>    | 650, 500                |
|      | <b>At3g17210 F/R3<sup>c</sup></b> | 5.9      | AGCACATTTTGCTAGCAAAGTTCAAAG | CAACATGAACAGGATGAGC         | 55              | 1.5               | <i>DdeI</i>    | A 450, B/h 600          |
|      | <b>At3g17210 F2/R<sup>c</sup></b> | 5.9      | GAGTTGTGAAGCACATTTTG        | TGATGAAGATTTTCTATGCTCACATCC | 55              | 1.5               | <i>DdeI</i>    | A/h 380 and 500, B null |
|      | <b>At5g49510</b>                  | 6.3      | AAGCCAGTTTAGAGTTCCTGTGG     | TTCTTTGGGAGTGGTAGCTTGTCG    | 59              | 1.5               | <i>DdeI</i>    | 310, 250                |
|      | <b>TG60</b>                       | 7.6      | GGTTTGTGGTAGGTTTCATCC       | TTTTTCTTTGTGAAATGTGC        | 51              | 1.5               | <i>Tsp509I</i> | 250, 120 and 150        |
|      | <b>At2g31970</b>                  | 7.7      | TGCGAGGGAGGTGTAGTGCTGG      | AACAGAGCTGCAGCAAGACTCTCAC   | 55              | 1.5               | <i>HpaII</i>   | 160 and 250, 400        |
|      | <b>At4g12590</b>                  | 9.4      | ACATGGCTATGGATATGATGAAGAAG  | ACCCAGAGAAGAAGAAGTTGACCC    | 55              | 1.5               | <i>HinfI</i>   | 120, 170                |
|      | <b>T1777</b>                      | 9.5      | AATTCTCCAGGAATTCACC         | TCCAACCATTGAATATTTCC        | 55              | 1.5               | <i>HaeIII</i>  | 700, 800                |
|      | <b>T1541</b>                      | 9.9      | CTCAACTATGGGTGGTGACAATAC    | CTTTAGGTTTTTCGGGCTCTTTAG    | 55              | 1.5               | <i>HinfI</i>   | 300, 350 and 450        |
|      | <b>TG69</b>                       | 12.0     | TCTTTCTTTGAACTTTTGG         | CAATGAGGGAAGTTCTTGG         | 51              | 1.5               | <i>FokI</i>    | 300, 350                |
|      | <b>At3g55360<sup>d</sup></b>      | 12.3     | TTTAGTGGTTACAGTAGCGGC       | TGCCTCTGCAGATCAGCAAC        | 55              | 2.0               | --             | 750, 400                |

Table S1, cont.

| Chr   | Marker             | Position | Forward Primer            | Reverse Primer              | Tm <sup>a</sup> | Mg                | Restriction   | band sizes (A, B) |
|-------|--------------------|----------|---------------------------|-----------------------------|-----------------|-------------------|---------------|-------------------|
|       |                    |          |                           |                             |                 | conc <sup>b</sup> | enzyme        |                   |
| Chr11 | TG194              | 0.0      | CAGATGAAAGAAAAGCCAAAAGAG  | AATGCTCAGAAGGGAAACATAAAG    | 57              | 2.0               | <i>MnII</i>   | 200, 400          |
|       | T0408              | 0.7      | ATCAGGAACTAGCTCACAGG      | AATCTTCCAGGCTTATTGG         | 57              | 2.0               | <i>MnII</i>   | 480, 290 and 300  |
|       | SSR67 <sup>e</sup> | 0.7      | GCACGAGACCAAGCAGATTA      | GGGCCTTCTCCAGTAGAC          | 61              | 1.5               | <i>Ddel</i>   | 850, 390 and 650  |
|       | J1                 | 1.4      | CATCCACCGCTATGTACGTG      | CACCACTCACCCATCTTGTG        | 60              | 1.5               | <i>RsaI</i>   | 250, 300 and 470  |
|       | TG523              | 1.5      | TGCAATGAAGATAAAAGACC      | GTGGATAACTCGTTAGTTTCG       | 53              | 1.5               | <i>DpnII</i>  | 350, 300          |
|       | At2g22570          | 1.5      | ACTGAAGAGTGAGATTCGGTGGAG  | TCTGTTCCAGTGATACAATGAGGAGG  | 55              | 1.5               | <i>HinfI</i>  | 190, 300          |
|       | At5g16710          | 3.0      | ACTTGATGAGCTGACAGCTTCAATG | AGCTTTGGTCCAAGCGACAAATC     | 55              | 1.5               | <i>HaellI</i> | 900, 1100         |
|       | U340899            | 3.4      | GTCCTTGAAGACTTTGATGC      | CCCACATTACCAAGATATGG        | 53              | 1.5               | <i>Ddel</i>   | 450, 300          |
|       | CT182              | 4.3      | AGTCATTTCAATTTGATTGTAGC   | AGGTGGCCAACCTCTTAGG         | 53              | 1.5               | <i>Asel</i>   | 500, 370          |
|       | At4g22260          | 4.4      | TCCTCTAACGGTCTAGAGAAATGGG | AGGAACTCTTGCAATTGTTCCAGAAC  | 55              | 1.5               | <i>HinfI</i>  | 300, 420          |
|       | At3g02870          | 4.8      | TGAAGCTGCTAAAAAGCTGGAGAG  | ACAAAAGGGAACCCGTGCACAAAG    | 55              | 1.5               | <i>HinfI</i>  | 950, 800          |
|       | At1g21690          | 5.5      | ATGCAGAGCTCTCAGCCATGGG    | ACCTACAGCAACAGCAGCAAAGTTC   | 57              | 1.5               | <i>Ddel</i>   | 400, 280          |
|       | At1g44446          | 5.5      | AGATCTTGACACGCACCTTTCAC   | TCCTTGACAGCCAGATGCAGGAGTC   | 55              | 1.5               | <i>Ddel</i>   | 200, 350          |
|       | At1g44790          | 5.6      | TCGGTTTTATCAAAGGCTATCGTC  | TGTTACTGTTCTACCTGGGAATTCTGG | 55              | 1.5               | <i>Asel</i>   | 130 and 160, 290  |
|       | cLEX-4-g10         | 6.9      | TCCTCCAGAATTATCTGAGC      | ACCAAGCTTTTCTTAAACC         | 51              | 1.5               | <i>HinfI</i>  | 450, 230 and 260  |
|       | cLEB-7-LI          | 7.5      | GAGATCTGCTCTTCTCTTGC      | ACAGCTCTGTTGATTCTTCC        | 59              | 1.5               | <i>RsaI</i>   | 850, 700          |
|       | TG147              | 7.6      | ACTGAGGTTAATGATGATGC      | GATTAATTGGGAGTATTTGTCC      | 51              | 1.5               | <i>RsaI</i>   | 180, 400          |
|       | At4g10050          | 8.4      | ATCACCTTCTGCCTTTTCTTC     | ATCTGGGATCTGAATGTCATCCTC    | 55              | 1.5               | <i>HinfI</i>  | 500, 350          |
|       | At2g14260          | 8.4      | AGGATCTATACCCCTCTATAGAGCC | TTATTGGGTGAAGTCCCACCTCC     | 55              | 1.5               | <i>Ddel</i>   | 550, 500          |
|       | At5g04590          | 9.0      | ATCACCACAGTCCTTGACAGGG    | AGGACAAAGTGGAAAAGCTGGG      | 58              | 1.5               | <i>Ddel</i>   | 750, 250          |
|       | TG400              | 9.4      | GCTAATTGAAGTCAAAGAGCACAC  | ACCTGTTGTTGCTTGGTTATATG     | 55              | 2.0               | <i>HaellI</i> | 275, 350          |

<sup>a</sup> Annealing temperature in Celsius.

<sup>b</sup> Mg concentration in mM.

<sup>c</sup> Marker is dominant.

<sup>d</sup> SCAR marker which does not require restriction enzyme digest for polymorphic bands.

<sup>e</sup> To detect a polymorphism between parental genotypes, a restriction enzyme digest of SSR67 was required.
