# Supplementary material for: Fractionation, Stability, and Isolate-Specificity of QTL for Resistance to Phytophthora infestans in Cultivated Tomato (Solanum lycopersicum)
Source: PubMed Central journal article supplement (PMC3464107; doi:10.1534/g3.112.003459), 2012-10-01
Supplement: supp_2.10.1145_TableS2.pdf [file supp_2.10.1145_TableS2.pdf]

**Table S2 Genotypes and means separation of sub-NILs for chr5**

Means separation is given for all 09FD\_120, GC\_120, and 10FD\_83 traits. Line Name indicates the name of each control or sub-NIL. The four digit designation for each sub-NIL is preceded by "08GH". The "2010" column indicates which lines were included in the 2010 field experiment. In the Genotype section, "A" indicates homozygosity for the *S. lycopersicum* allele, "B" indicates homozygosity for the *S. habrochaites* allele, and "h" indicates heterozygosity. Trait names are given according to dataset, location or isolate, and trait evaluated (see Materials & Methods). The lowest mean AUDPC for each trait is in bold and underlined.

| Line Name | Genotype |      | Means Separation |         |       |          |         |         |         |      |         |         |      |         |         |       |       |      |         |                    |                    |                           |                          |                         |                         |                         |                    |
|-----------|----------|------|------------------|---------|-------|----------|---------|---------|---------|------|---------|---------|------|---------|---------|-------|-------|------|---------|--------------------|--------------------|---------------------------|--------------------------|-------------------------|-------------------------|-------------------------|--------------------|
|           | ID       | 2010 | TG358            | At10500 | T0536 | cLEX13G5 | U221402 | At55800 | At39950 | TG23 | At17210 | At49510 | TG60 | At31970 | At12590 | T1777 | T1541 | TG69 | At55360 | 09FD_120 Loc1 LEAF | 09FD_120 Loc2 LEAF | 10FD-early_83 Loc1&2 LEAF | 10FD-late_83 Loc1&2 LEAF | GC_120 p7629 LEAF       | GC_120 p10353 LEAF      | GC_120 Sal10 LEAF       |                    |
| Hyp45-A   | 121      | x    | A                | A       | A     | A        | A       | A       | A       | A    | A       | A       | A    | A       | A       | A     | A     | A    | A       | A                  | 6.02 <sup>ab</sup> | 4.70 <sup>a-e</sup>       | 5.33 <sup>ab</sup>       | 6.71 <sup>ab</sup>      | 3.71 <sup>a</sup>       | 4.51 <sup>a</sup>       | 4.30 <sup>a</sup>  |
| Hyp45-B   | 122      |      | A                | A       | A     | A        | A       | A       | A       | A    | A       | A       | A    | A       | A       | A     | A     | A    | A       | A                  | 6.17 <sup>ab</sup> | 5.36 <sup>ab</sup>        | --                       | --                      | --                      | --                      | --                 |
| E6203-A   | 123      | x    | A                | A       | A     | A        | A       | A       | A       | A    | A       | A       | A    | A       | A       | A     | A     | A    | A       | A                  | 6.24 <sup>ab</sup> | 4.35 <sup>a-e</sup>       | 5.26 <sup>a-c</sup>      | 6.62 <sup>a-e</sup>     | --                      | --                      | --                 |
| E6203-B   | 124      | x    | A                | A       | A     | A        | A       | A       | A       | A    | A       | A       | A    | A       | A       | A     | A     | A    | A       | A                  | 6.21 <sup>ab</sup> | 4.62 <sup>a-e</sup>       | 5.05 <sup>a-f</sup>      | 6.52 <sup>a-g</sup>     | 3.36 <sup>ab</sup>      | 4.22 <sup>a</sup>       | 4.06 <sup>ab</sup> |
| E6203-C   | 129      | x    | A                | A       | A     | A        | A       | A       | A       | A    | A       | A       | A    | A       | A       | A     | A     | A    | A       | A                  | --                 | --                        | 4.96 <sup>a-i</sup>      | 6.44 <sup>a-h</sup>     | --                      | --                      | --                 |
| E6203-D   | 130      | x    | A                | A       | A     | A        | A       | A       | A       | A    | A       | A       | A    | A       | A       | A     | A     | A    | A       | A                  | --                 | --                        | 5.03 <sup>a-g</sup>      | 6.32 <sup>a-h</sup>     | --                      | --                      | --                 |
| LB5-NIL-A | 125      | x    | B                | B       | B     | B        | B       | B       | B       | B    | B       | B       | B    | B       | B       | B     | B     | B    | B       | B                  | 5.74 <sup>ab</sup> | 4.16 <sup>a-e</sup>       | 4.35 <sup>h-l</sup>      | <b>5.78<sup>h</sup></b> | <b>2.42<sup>c</sup></b> | <b>3.02<sup>b</sup></b> | 3.33 <sup>b</sup>  |
| LB5-NIL-B | 127      | x    | B                | B       | B     | B        | B       | B       | B       | B    | B       | B       | B    | B       | B       | B     | B     | B    | B       | B                  | --                 | --                        | <b>4.20<sup>l</sup></b>  | 5.89 <sup>f-h</sup>     | --                      | --                      | --                 |
| 7187      | 102      |      | B                | B       | A     | A        | A       | A       | A       | A    | A       | A       | A    | A       | A       | A     | A     | A    | A       | A                  | 5.43 <sup>ab</sup> | 3.38 <sup>c-e</sup>       | --                       | --                      | 3.40 <sup>ab</sup>      | 4.14 <sup>ab</sup>      | 3.16 <sup>ab</sup> |
| 7214      | 103      | x    | B                | B       | A     | A        | A       | A       | A       | A    | A       | A       | A    | A       | A       | A     | A     | A    | A       | A                  | 5.43 <sup>ab</sup> | 3.47 <sup>c-e</sup>       | 4.65 <sup>c-l</sup>      | 6.52 <sup>a-g</sup>     | 2.92 <sup>a-c</sup>     | 3.93 <sup>ab</sup>      | 3.57 <sup>ab</sup> |
| 5455      | 52       | x    | B                | B       | B     | A        | A       | A       | A       | A    | A       | A       | A    | A       | A       | A     | A     | A    | A       | A                  | 5.55 <sup>ab</sup> | 4.61 <sup>a-e</sup>       | 4.91 <sup>a-j</sup>      | 6.06 <sup>b-h</sup>     | 3.70 <sup>ab</sup>      | 4.12 <sup>ab</sup>      | 4.20 <sup>ab</sup> |
| 5470      | 53       | x    | B                | B       | B     | A        | A       | A       | A       | A    | A       | A       | A    | A       | A       | A     | A     | A    | A       | A                  | 6.38 <sup>ab</sup> | 4.12 <sup>a-e</sup>       | 4.59 <sup>d-l</sup>      | 5.94 <sup>d-h</sup>     | 3.40 <sup>ab</sup>      | 4.33 <sup>ab</sup>      | 4.72 <sup>ab</sup> |
| 7127      | 100      | x    | B                | B       | B     | A        | A       | A       | A       | A    | A       | A       | A    | A       | A       | A     | A     | A    | A       | A                  | 5.93 <sup>ab</sup> | 4.48 <sup>a-e</sup>       | 4.50 <sup>e-l</sup>      | 6.06 <sup>b-h</sup>     | 3.43 <sup>ab</sup>      | 3.79 <sup>ab</sup>      | 3.44 <sup>ab</sup> |

Table S2, cont.

| Line Name | Genotype |             | Means Separation |         |       |          |         |         |         |      |         |         |      |         |         |       |       |      |         |                    |                    |                           |                          |                     |                     |                    |                    |
|-----------|----------|-------------|------------------|---------|-------|----------|---------|---------|---------|------|---------|---------|------|---------|---------|-------|-------|------|---------|--------------------|--------------------|---------------------------|--------------------------|---------------------|---------------------|--------------------|--------------------|
|           | 2010     | Genotype ID | TG358            | At10500 | Tn536 | CLEX13G5 | U221402 | At55800 | At39950 | TG23 | At17210 | At49510 | TG60 | At31970 | At12590 | T1777 | T1541 | TG69 | At55360 | 09FD_120 Loc1 LEAF | 09FD_120 Loc2 LEAF | 10FD-early_83 Loc1&2 LEAF | 10FD-late_83 Loc1&2 LEAF | GC_120 p7629 LEAF   | GC_120 p10353 LEAF  | GC_120 Sal10 LEAF  |                    |
| 7094      | 99       | x           | B                | B       | B     | B        | A       | A       | A       | A    | A       | A       | A    | A       | A       | A     | A     | A    | A       | A                  | 6.17 <sup>ab</sup> | 3.26 <sup>de</sup>        | 4.52 <sup>e-1</sup>      | 5.94 <sup>d-h</sup> | 3.32 <sup>a-c</sup> | 4.03 <sup>ab</sup> | 4.22 <sup>ab</sup> |
| 7226      | 104      |             | B                | B       | B     | B        | A       | A       | A       | A    | A       | A       | A    | A       | A       | A     | A     | A    | A       | A                  | 5.76 <sup>ab</sup> | 3.75 <sup>b-e</sup>       | --                       | --                  | 3.78 <sup>ab</sup>  | 4.21 <sup>ab</sup> | 4.30 <sup>ab</sup> |
| 6555      | 84       | x           | B                | B       | B     | B        | B       | A       | A       | A    | A       | A       | A    | A       | A       | A     | A     | A    | A       | A                  | 5.86 <sup>ab</sup> | 5.62 <sup>a</sup>         | 4.70 <sup>a-1</sup>      | 6.37 <sup>a-h</sup> | 3.05 <sup>a-c</sup> | 4.13 <sup>ab</sup> | 3.34 <sup>ab</sup> |
| 7444      | 106      |             | B                | B       | B     | B        | B       | A       | A       | A    | A       | A       | A    | A       | A       | A     | A     | A    | A       | A                  | 5.95 <sup>ab</sup> | 4.25 <sup>a-e</sup>       | --                       | --                  | 3.51 <sup>ab</sup>  | 4.23 <sup>ab</sup> | 4.27 <sup>ab</sup> |
| 7471      | 108      | x           | B                | B       | B     | B        | B       | B       | A       | A    | A       | A       | A    | A       | A       | A     | A     | A    | A       | A                  | 5.86 <sup>ab</sup> | <b>3.03<sup>e</sup></b>   | 5.01 <sup>a-g</sup>      | 6.57 <sup>a-f</sup> | 3.34 <sup>a-c</sup> | 3.81 <sup>ab</sup> | 4.12 <sup>ab</sup> |
| 5592      | 56       | x           | B                | B       | B     | B        | B       | B       | B       | A    | A       | A       | A    | A       | A       | A     | A     | A    | A       | A                  | 5.75 <sup>ab</sup> | 3.92 <sup>a-e</sup>       | 4.84 <sup>a-1</sup>      | 6.27 <sup>a-h</sup> | 3.35 <sup>a-c</sup> | 4.12 <sup>ab</sup> | 3.35 <sup>ab</sup> |
| 6215      | 72       | x           | B                | B       | B     | B        | B       | B       | B       | A    | A       | A       | A    | A       | A       | A     | A     | A    | A       | A                  | 6.05 <sup>ab</sup> | 3.75 <sup>b-e</sup>       | 4.62 <sup>c-1</sup>      | 6.71 <sup>ab</sup>  | 3.08 <sup>a-c</sup> | 3.37 <sup>ab</sup> | 4.08 <sup>ab</sup> |
| 6497      | 83       | x           | B                | B       | B     | B        | B       | B       | B       | A    | A       | A       | A    | A       | A       | A     | A     | A    | A       | A                  | 5.74 <sup>ab</sup> | 4.72 <sup>a-e</sup>       | 4.39 <sup>g-1</sup>      | 5.98 <sup>c-h</sup> | 3.19 <sup>a-c</sup> | 4.28 <sup>ab</sup> | 4.52 <sup>ab</sup> |
| 6979      | 98       | x           | B                | B       | B     | B        | B       | B       | B       | A    | A       | A       | A    | A       | A       | A     | A     | A    | A       | A                  | 5.86 <sup>ab</sup> | 4.44 <sup>a-e</sup>       | 4.80 <sup>a-1</sup>      | 6.68 <sup>a-c</sup> | 3.44 <sup>ab</sup>  | 3.66 <sup>ab</sup> | 3.87 <sup>ab</sup> |
| 5553      | 55       |             | B                | B       | B     | B        | B       | B       | B       | B    | A       | A       | A    | A       | A       | A     | A     | A    | A       | A                  | 5.64 <sup>ab</sup> | 4.46 <sup>a-e</sup>       | --                       | --                  | 3.38 <sup>ab</sup>  | 3.71 <sup>ab</sup> | 3.68 <sup>ab</sup> |
| 5873      | 65       | x           | B                | B       | B     | B        | B       | B       | B       | B    | A       | A       | A    | A       | A       | A     | A     | A    | A       | A                  | 5.69 <sup>ab</sup> | 3.99 <sup>a-e</sup>       | 4.72 <sup>a-1</sup>      | 6.30 <sup>a-h</sup> | 3.41 <sup>ab</sup>  | 3.80 <sup>ab</sup> | 4.08 <sup>ab</sup> |
| 6941      | 96       | x           | B                | B       | B     | B        | B       | B       | B       | B    | B       | A       | A    | A       | A       | A     | A     | A    | A       | A                  | 5.82 <sup>ab</sup> | 4.20 <sup>a-e</sup>       | 4.52 <sup>e-1</sup>      | 6.14 <sup>a-h</sup> | 2.55 <sup>bc</sup>  | 3.21 <sup>ab</sup> | 3.25 <sup>ab</sup> |
| 7459      | 107      | x           | B                | B       | B     | B        | B       | B       | B       | B    | B       | A       | A    | A       | A       | A     | A     | A    | A       | A                  | 5.71 <sup>ab</sup> | 4.39 <sup>a-e</sup>       | 4.76 <sup>a-1</sup>      | 6.65 <sup>a-d</sup> | 3.15 <sup>a-c</sup> | 3.65 <sup>ab</sup> | 3.55 <sup>ab</sup> |
| 6603      | 85       |             | B                | B       | B     | B        | B       | B       | B       | B    | B       | B       | A    | A       | A       | A     | A     | A    | A       | A                  | 5.76 <sup>ab</sup> | 3.51 <sup>c-e</sup>       | --                       | --                  | 3.35 <sup>ab</sup>  | 4.18 <sup>ab</sup> | 3.42 <sup>ab</sup> |
| 6947      | 97       | x           | B                | B       | B     | B        | B       | B       | B       | B    | B       | B       | A    | A       | A       | A     | A     | A    | A       | A                  | 5.55 <sup>ab</sup> | 3.72 <sup>b-e</sup>       | 4.71 <sup>a-1</sup>      | 6.33 <sup>a-h</sup> | 3.41 <sup>ab</sup>  | 3.70 <sup>ab</sup> | 3.11 <sup>ab</sup> |
| 6072      | 70       | x           | B                | B       | B     | B        | B       | B       | B       | B    | B       | B       | B    | A       | A       | A     | A     | A    | A       | A                  | 5.74 <sup>ab</sup> | 4.08 <sup>a-e</sup>       | 4.44 <sup>f-1</sup>      | 6.40 <sup>a-h</sup> | 3.42 <sup>ab</sup>  | 3.57 <sup>ab</sup> | 4.12 <sup>ab</sup> |
| 6927      | 95       | x           | B                | B       | B     | B        | B       | B       | B       | B    | B       | B       | B    | B       | A       | A     | A     | A    | A       | A                  | 5.86 <sup>ab</sup> | 4.22 <sup>a-e</sup>       | 4.83 <sup>a-1</sup>      | 6.55 <sup>a-f</sup> | 2.73 <sup>a-c</sup> | 3.84 <sup>ab</sup> | 4.12 <sup>ab</sup> |
| 7374      | 105      | x           | B                | B       | B     | B        | B       | B       | B       | B    | B       | B       | B    | B       | A       | A     | A     | A    | A       | A                  | 5.71 <sup>ab</sup> | 3.79 <sup>b-e</sup>       | 4.39 <sup>g-1</sup>      | 6.17 <sup>a-h</sup> | 3.43 <sup>ab</sup>  | 4.22 <sup>ab</sup> | 4.46 <sup>ab</sup> |
| 6856      | 93       | x           | B                | B       | B     | B        | B       | B       | B       | B    | B       | B       | B    | B       | B       | B     | B     | A    | A       | A                  | 5.52 <sup>ab</sup> | 3.73 <sup>b-e</sup>       | 4.26 <sup>j-1</sup>      | 6.02 <sup>b-h</sup> | 3.35 <sup>ab</sup>  | 4.20 <sup>ab</sup> | 4.22 <sup>ab</sup> |
| 6900      | 94       | x           | B                | B       | B     | B        | B       | B       | B       | B    | B       | B       | B    | B       | B       | B     | B     | h    | A       | A                  | 5.48 <sup>ab</sup> | 4.07 <sup>a-e</sup>       | 4.46 <sup>f-1</sup>      | 6.44 <sup>a-h</sup> | 2.76 <sup>bc</sup>  | 3.91 <sup>ab</sup> | 3.73 <sup>ab</sup> |

Table S2, cont.

| Line Name | Genotype ID | 2010 | Genotype |         |       |          |         |         |         |      |         |         |      |         |         |       | Means Separation |      |         |                    |                         |                           |                          |                     |                     |                    |                          |
|-----------|-------------|------|----------|---------|-------|----------|---------|---------|---------|------|---------|---------|------|---------|---------|-------|------------------|------|---------|--------------------|-------------------------|---------------------------|--------------------------|---------------------|---------------------|--------------------|--------------------------|
|           |             |      | TG358    | At10500 | T0536 | CLEX13G5 | U221402 | At55800 | At39950 | TG23 | At17210 | At49510 | TG60 | At31970 | At12590 | T1777 | T1541            | TG69 | At55360 | 09FD_120 Loc1 LEAF | 09FD_120 Loc2 LEAF      | 10FD-early_83 Loc1&2 LEAF | 10FD-late_83 Loc1&2 LEAF | GC_120 p7629 LEAF   | GC_120 p10353 LEAF  | GC_120 Sai10 LEAF  |                          |
| 6321      | 79          | x    | A        | A       | B     | B        | B       | B       | B       | B    | B       | B       | B    | B       | B       | B     | B                | B    | B       | B                  | 5.64 <sup>ab</sup>      | 3.69 <sup>b-e</sup>       | 4.58 <sup>d-l</sup>      | 6.33 <sup>a-h</sup> | 3.33 <sup>ab</sup>  | 3.74 <sup>ab</sup> | 3.18 <sup>ab</sup>       |
| 6747      | 89          |      | A        | A       | B     | B        | B       | B       | B       | B    | B       | B       | B    | B       | B       | B     | B                | B    | B       | B                  | 5.50 <sup>ab</sup>      | 4.29 <sup>a-e</sup>       | --                       | --                  | 3.76 <sup>ab</sup>  | 4.45 <sup>ab</sup> | 4.21 <sup>ab</sup>       |
| 6328      | 80          | x    | A        | A       | A     | B        | B       | B       | B       | B    | B       | B       | B    | B       | B       | B     | B                | B    | B       | B                  | 5.43 <sup>ab</sup>      | 4.01 <sup>a-e</sup>       | 4.58 <sup>d-l</sup>      | 6.63 <sup>a-e</sup> | 3.61 <sup>ab</sup>  | 3.56 <sup>ab</sup> | 4.29 <sup>ab</sup>       |
| 6681      | 86          |      | A        | A       | A     | B        | B       | B       | B       | B    | B       | B       | B    | B       | B       | B     | B                | B    | B       | B                  | 6.14 <sup>ab</sup>      | 4.22 <sup>a-e</sup>       | --                       | --                  | 3.54 <sup>ab</sup>  | 4.21 <sup>ab</sup> | 4.40 <sup>ab</sup>       |
| 6345      | 81          | x    | A        | A       | A     | A        | B       | B       | B       | B    | B       | B       | B    | B       | B       | B     | B                | B    | B       | B                  | 5.93 <sup>ab</sup>      | 4.58 <sup>a-e</sup>       | 4.50 <sup>e-l</sup>      | 5.94 <sup>d-h</sup> | 3.19 <sup>a-c</sup> | 4.25 <sup>ab</sup> | 3.22 <sup>ab</sup>       |
| 6709      | 87          |      | A        | A       | A     | A        | B       | B       | B       | B    | B       | B       | B    | B       | B       | B     | B                | B    | B       | B                  | 5.76 <sup>ab</sup>      | 4.10 <sup>a-e</sup>       | --                       | --                  | 3.15 <sup>a-c</sup> | 3.88 <sup>ab</sup> | 3.53 <sup>ab</sup>       |
| 6288      | 77          | x    | A        | A       | A     | A        | A       | B       | B       | B    | B       | B       | B    | B       | B       | B     | B                | B    | B       | B                  | 5.50 <sup>ab</sup>      | 4.22 <sup>a-e</sup>       | 4.70 <sup>b-l</sup>      | 6.52 <sup>a-g</sup> | 3.25 <sup>a-c</sup> | 3.78 <sup>ab</sup> | 4.09 <sup>ab</sup>       |
| 5516      | 54          | x    | A        | A       | A     | A        | A       | A       | B       | B    | B       | B       | B    | B       | B       | B     | B                | B    | B       | B                  | 5.24 <sup>ab</sup>      | 3.59 <sup>b-e</sup>       | 4.31 <sup>j-l</sup>      | 6.35 <sup>a-h</sup> | 3.51 <sup>ab</sup>  | 3.29 <sup>ab</sup> | 3.70 <sup>ab</sup>       |
| 6226      | 73          |      | A        | A       | A     | A        | A       | A       | B       | B    | B       | B       | B    | B       | B       | B     | B                | B    | B       | B                  | 5.76 <sup>ab</sup>      | 4.49 <sup>a-e</sup>       | --                       | --                  | 3.10 <sup>a-c</sup> | 3.17 <sup>ab</sup> | 4.32 <sup>ab</sup>       |
| 6234      | 74          |      | A        | A       | A     | A        | A       | A       | B       | B    | B       | B       | B    | B       | B       | B     | B                | B    | B       | B                  | <b>4.69<sup>b</sup></b> | 3.25 <sup>de</sup>        | --                       | --                  | 2.85 <sup>a-c</sup> | 4.42 <sup>ab</sup> | 3.79 <sup>ab</sup>       |
| 6423      | 82          |      | A        | A       | A     | A        | A       | A       | B       | B    | B       | B       | B    | B       | B       | B     | B                | B    | B       | B                  | 6.00 <sup>ab</sup>      | 3.98 <sup>a-e</sup>       | --                       | --                  | 3.56 <sup>ab</sup>  | 3.58 <sup>ab</sup> | 4.21 <sup>ab</sup>       |
| 6724      | 88          |      | A        | A       | A     | A        | A       | A       | B       | B    | B       | B       | B    | B       | B       | B     | B                | B    | B       | B                  | 5.17 <sup>ab</sup>      | 3.96 <sup>a-e</sup>       | --                       | --                  | 3.52 <sup>ab</sup>  | 3.85 <sup>ab</sup> | 3.48 <sup>ab</sup>       |
| 7166      | 101         |      | A        | A       | A     | A        | A       | A       | B       | B    | B       | B       | B    | B       | B       | B     | B                | B    | B       | B                  | 5.33 <sup>ab</sup>      | 3.93 <sup>a-e</sup>       | --                       | --                  | 3.00 <sup>a-c</sup> | 4.23 <sup>ab</sup> | 3.11 <sup>ab</sup>       |
| 6261      | 75          | x    | A        | A       | A     | A        | A       | A       | A       | B    | B       | B       | B    | B       | B       | B     | B                | B    | B       | B                  | 5.00 <sup>ab</sup>      | 4.12 <sup>a-e</sup>       | 4.70 <sup>a-l</sup>      | 6.17 <sup>a-h</sup> | 3.07 <sup>a-c</sup> | 3.60 <sup>ab</sup> | <b>2.76<sup>ab</sup></b> |
| 6782      | 90          |      | A        | A       | A     | A        | A       | A       | A       | B    | B       | B       | B    | B       | B       | B     | B                | B    | B       | B                  | 5.60 <sup>ab</sup>      | 4.24 <sup>a-e</sup>       | --                       | --                  | 2.96 <sup>a-c</sup> | 4.12 <sup>ab</sup> | 3.76 <sup>ab</sup>       |
| 5861      | 64          | x    | A        | A       | A     | A        | A       | A       | A       | A    | B       | B       | B    | B       | B       | B     | B                | B    | B       | B                  | 5.24 <sup>ab</sup>      | 4.24 <sup>a-e</sup>       | 4.25 <sup>kl</sup>       | 6.09 <sup>b-h</sup> | 2.95 <sup>a-c</sup> | 3.44 <sup>ab</sup> | 4.11 <sup>ab</sup>       |
| 6799      | 91          |      | A        | A       | A     | A        | A       | A       | A       | A    | B       | B       | B    | B       | B       | B     | B                | B    | B       | B                  | 5.43 <sup>ab</sup>      | 3.61 <sup>b-e</sup>       | --                       | --                  | 3.19 <sup>a-c</sup> | 4.10 <sup>ab</sup> | 3.47 <sup>ab</sup>       |
| 5616      | 58          | x    | A        | A       | A     | A        | A       | A       | A       | A    | A       | B       | B    | B       | B       | B     | B                | B    | B       | B                  | 5.36 <sup>ab</sup>      | 4.20 <sup>a-e</sup>       | 4.32 <sup>j-l</sup>      | 5.83 <sup>gh</sup>  | 3.12 <sup>a-c</sup> | 4.47 <sup>a</sup>  | 3.64 <sup>ab</sup>       |
| 5920      | 66          |      | A        | A       | A     | A        | A       | A       | A       | A    | A       | B       | B    | B       | B       | B     | B                | B    | B       | B                  | 5.76 <sup>ab</sup>      | 4.14 <sup>a-e</sup>       | --                       | --                  | 3.21 <sup>a-c</sup> | 4.07 <sup>ab</sup> | 3.17 <sup>ab</sup>       |
| 5941      | 67          |      | A        | A       | A     | A        | A       | A       | A       | A    | A       | B       | B    | B       | B       | B     | B                | B    | B       | B                  | 5.40 <sup>ab</sup>      | 4.46 <sup>a-e</sup>       | --                       | --                  | 3.46 <sup>ab</sup>  | 4.89 <sup>a</sup>  | 3.40 <sup>ab</sup>       |

Table S2, cont.

| Line Name               | Genotype    |      | Means Separation |         |       |          |         |         |         |      |         |         |      |         |         |       |       |      |         |                    |                    |                           |                          |                     |                     |                    |                    |
|-------------------------|-------------|------|------------------|---------|-------|----------|---------|---------|---------|------|---------|---------|------|---------|---------|-------|-------|------|---------|--------------------|--------------------|---------------------------|--------------------------|---------------------|---------------------|--------------------|--------------------|
|                         | Genotype ID | 2010 | TG358            | At10500 | T0536 | clEX13G5 | U221402 | At55800 | At39950 | TG23 | At17210 | At49510 | TG60 | At31970 | At12590 | T1777 | T1541 | TG69 | At55360 | 09FD_120 Loc1 LEAF | 09FD_120 Loc2 LEAF | 10FD-early_83 Loc1&2 LEAF | 10FD-late_83 Loc1&2 LEAF | GC_120 p7629 LEAF   | GC_120 p10353 LEAF  | GC_120 Sal10 LEAF  |                    |
| 5968                    | 68          |      | A                | A       | A     | A        | A       | A       | A       | A    | A       | A       | B    | B       | B       | B     | B     | B    | B       | B                  | 5.67 <sup>ab</sup> | 4.40 <sup>a-e</sup>       | --                       | --                  | 2.94 <sup>a-c</sup> | 4.37 <sup>ab</sup> | 3.87 <sup>ab</sup> |
| 5705                    | 59          | x    | A                | A       | A     | A        | A       | A       | A       | A    | A       | A       | A    | A       | B       | B     | B     | B    | B       | B                  | 6.57 <sup>a</sup>  | 4.82 <sup>a-d</sup>       | 5.00 <sup>a-h</sup>      | 6.40 <sup>a-h</sup> | 2.91 <sup>a-c</sup> | 3.43 <sup>ab</sup> | 4.49 <sup>ab</sup> |
| 5722                    | 60          | x    | A                | A       | A     | A        | A       | A       | A       | A    | A       | A       | A    | A       | B       | B     | B     | B    | B       | B                  | 5.67 <sup>ab</sup> | 4.84 <sup>a-d</sup>       | 4.98 <sup>a-h</sup>      | 6.49 <sup>a-h</sup> | 3.01 <sup>a-c</sup> | 3.91 <sup>ab</sup> | 4.40 <sup>ab</sup> |
| 6011                    | 69          | x    | A                | A       | A     | A        | A       | A       | A       | A    | A       | A       | A    | A       | B       | B     | B     | B    | B       | B                  | 6.00 <sup>ab</sup> | 4.58 <sup>a-e</sup>       | 4.66 <sup>c-l</sup>      | 6.32 <sup>a-h</sup> | 3.17 <sup>a-c</sup> | 4.46 <sup>ab</sup> | 4.61 <sup>ab</sup> |
| 6302                    | 78          | x    | A                | A       | A     | A        | A       | A       | A       | A    | A       | A       | A    | A       | B       | B     | B     | B    | B       | B                  | 4.69 <sup>b</sup>  | 5.07 <sup>a-c</sup>       | 5.13 <sup>a-e</sup>      | 6.33 <sup>a-h</sup> | 2.91 <sup>a-c</sup> | 4.04 <sup>ab</sup> | 3.77 <sup>ab</sup> |
| 5605                    | 57          | x    | A                | A       | A     | A        | A       | A       | A       | A    | A       | A       | A    | A       | A       | A     | B     | B    | B       | B                  | 6.40 <sup>a</sup>  | 5.29 <sup>ab</sup>        | 5.00 <sup>a-g</sup>      | 6.60 <sup>a-f</sup> | 3.40 <sup>ab</sup>  | 3.81 <sup>ab</sup> | 3.88 <sup>ab</sup> |
| 5771                    | 62          | x    | A                | A       | A     | A        | A       | A       | A       | A    | A       | A       | A    | A       | A       | A     | A     | B    | B       | B                  | 6.00 <sup>ab</sup> | 4.12 <sup>a-e</sup>       | 4.90 <sup>a-k</sup>      | 5.92 <sup>e-h</sup> | 3.30 <sup>a-c</sup> | 3.69 <sup>ab</sup> | 4.35 <sup>ab</sup> |
| 6094                    | 71          | x    | A                | A       | A     | A        | A       | A       | A       | A    | A       | A       | A    | A       | A       | A     | A     | B    | B       | B                  | 6.33 <sup>ab</sup> | 4.17 <sup>a-e</sup>       | 4.77 <sup>a-l</sup>      | 6.36 <sup>a-h</sup> | 3.53 <sup>ab</sup>  | 4.39 <sup>ab</sup> | 3.58 <sup>ab</sup> |
| 6278                    | 76          | x    | A                | A       | A     | A        | A       | A       | A       | A    | A       | A       | A    | A       | A       | A     | A     | B    | B       | B                  | 6.00 <sup>ab</sup> | 3.89 <sup>a-e</sup>       | 5.34 <sup>ab</sup>       | 6.62 <sup>a-e</sup> | 2.94 <sup>a-c</sup> | 3.52 <sup>ab</sup> | 3.45 <sup>ab</sup> |
| 7610                    | 109         | x    | A                | A       | A     | A        | A       | A       | A       | A    | A       | A       | A    | A       | A       | A     | A     | B    | B       | B                  | 6.07 <sup>ab</sup> | 4.60 <sup>a-e</sup>       | 5.19 <sup>a-d</sup>      | 6.30 <sup>a-h</sup> | 3.18 <sup>a-c</sup> | 4.42 <sup>ab</sup> | 3.68 <sup>ab</sup> |
| 5726                    | 61          | x    | A                | A       | A     | A        | A       | A       | A       | A    | A       | A       | A    | A       | A       | A     | A     | A    | B       | B                  | 6.00 <sup>ab</sup> | 4.39 <sup>a-e</sup>       | 5.35 <sup>a</sup>        | 6.84 <sup>a</sup>   | 3.08 <sup>a-c</sup> | 3.66 <sup>ab</sup> | 3.77 <sup>ab</sup> |
| 6042                    | 63          | x    | A                | A       | A     | A        | A       | A       | A       | A    | A       | A       | A    | A       | A       | A     | A     | A    | B       | B                  | 5.64 <sup>ab</sup> | 4.11 <sup>a-e</sup>       | 4.84 <sup>a-l</sup>      | 6.25 <sup>a-h</sup> | 3.88 <sup>a</sup>   | 4.34 <sup>ab</sup> | 3.96 <sup>ab</sup> |
| 6805                    | 92          | x    | A                | A       | A     | A        | A       | A       | A       | A    | A       | B       | A    | A       | A       | A     | A     | A    | A       | A                  | 5.55 <sup>ab</sup> | 4.30 <sup>a-e</sup>       | 4.84 <sup>a-l</sup>      | 6.48 <sup>a-h</sup> | 3.20 <sup>a-c</sup> | 3.88 <sup>ab</sup> | 4.13 <sup>ab</sup> |
| <b>Means Separation</b> |             |      |                  |         |       |          |         |         |         |      |         |         |      |         |         |       |       |      |         | *                  | *                  | *                         | *                        | *                   | *                   | *                  |                    |

Table S2, cont.

| Line Name | Genotype<br>ID | 2010 | Means Separation        |                            |                            |                           |                           |                     |                    |                    |  |
|-----------|----------------|------|-------------------------|----------------------------|----------------------------|---------------------------|---------------------------|---------------------|--------------------|--------------------|--|
|           |                |      | 09FD_120 Loc1&2<br>STEM | 10FD-early_83 Loc1<br>STEM | 10FD-early_83 Loc2<br>STEM | 10FD-late_83 Loc1<br>STEM | 10FD-late_83 Loc2<br>STEM | GC_120 p7629 STEM   | GC_120 p10353 STEM | GC_120 Sal10 STEM  |  |
| Hyp45-A   | 121            | x    | 3.38 <sup>a-d</sup>     | 3.78 <sup>a-h</sup>        | 3.02 <sup>a-e</sup>        | 5.00                      | 4.77 <sup>ab</sup>        | 2.13 <sup>a</sup>   | 2.45 <sup>a</sup>  | 2.20 <sup>ab</sup> |  |
| Hyp45-B   | 122            |      | 3.37 <sup>a-d</sup>     | --                         | --                         | --                        | --                        | --                  | --                 | --                 |  |
| E6203-A   | 123            | x    | 2.61 <sup>b-j</sup>     | 3.68 <sup>b-h</sup>        | 2.70 <sup>b-i</sup>        | 4.82                      | 4.55 <sup>a-d</sup>       | --                  | --                 | --                 |  |
| E6203-B   | 124            | x    | 2.64 <sup>b-j</sup>     | 3.78 <sup>a-h</sup>        | 2.70 <sup>b-i</sup>        | 4.81                      | 4.25 <sup>a-f</sup>       | 1.62 <sup>a-c</sup> | 2.10 <sup>ab</sup> | 1.97 <sup>ab</sup> |  |
| E6203-C   | 129            | x    | --                      | 3.64 <sup>b-h</sup>        | 2.75 <sup>b-i</sup>        | 4.82                      | 4.61 <sup>a-c</sup>       | --                  | --                 | --                 |  |
| E6203-D   | 130            | x    | --                      | 3.56 <sup>b-h</sup>        | 2.38 <sup>b-i</sup>        | 4.56                      | 4.30 <sup>a-f</sup>       | --                  | --                 | --                 |  |
| LB5-NIL-A | 125            | x    | 3.35 <sup>a-e</sup>     | 3.86 <sup>a-e</sup>        | 3.10 <sup>a-d</sup>        | 5.00                      | 4.23 <sup>a-f</sup>       | 1.37 <sup>bc</sup>  | 1.61 <sup>b</sup>  | 1.96 <sup>ab</sup> |  |
| LB5-NIL-B | 127            | x    | --                      | 3.90 <sup>a-d</sup>        | 3.30 <sup>ab</sup>         | 4.82                      | 4.23 <sup>a-f</sup>       | --                  | --                 | --                 |  |
| 7187      | 102            |      | 2.39 <sup>f-j</sup>     | --                         | --                         | --                        | --                        | 1.60 <sup>a-c</sup> | 2.48 <sup>ab</sup> | 1.03 <sup>b</sup>  |  |
| 7214      | 103            | x    | 2.82 <sup>b-j</sup>     | 3.23 <sup>f-i</sup>        | 1.80 <sup>hi</sup>         | 4.78                      | 3.66 <sup>d-f</sup>       | 1.27 <sup>a-c</sup> | 2.60 <sup>ab</sup> | 2.48 <sup>ab</sup> |  |
| 5455      | 52             | x    | 3.04 <sup>a-h</sup>     | 3.62 <sup>b-h</sup>        | 2.84 <sup>a-h</sup>        | 4.75                      | 4.11 <sup>a-f</sup>       | 2.09 <sup>a-c</sup> | 2.24 <sup>ab</sup> | 2.62 <sup>ab</sup> |  |
| 5470      | 53             | x    | 2.59 <sup>b-j</sup>     | 3.74 <sup>a-h</sup>        | 2.65 <sup>b-i</sup>        | 4.65                      | 3.66 <sup>d-f</sup>       | 1.60 <sup>a-c</sup> | 2.50 <sup>ab</sup> | 2.67 <sup>ab</sup> |  |
| 7127      | 100            | x    | 3.28 <sup>a-f</sup>     | 3.66 <sup>b-h</sup>        | 3.00 <sup>a-f</sup>        | 4.71                      | 3.79 <sup>c-f</sup>       | 1.84 <sup>a-c</sup> | 2.63 <sup>ab</sup> | 2.16 <sup>ab</sup> |  |

Table S2, cont.

| Line Name | Genotype<br>ID | 2010 | Means Separation         |                            |                            |                           |                           |                     |                    |                          |  |
|-----------|----------------|------|--------------------------|----------------------------|----------------------------|---------------------------|---------------------------|---------------------|--------------------|--------------------------|--|
|           |                |      | 09FD_120 Loc1&2<br>STEM  | 10FD-early_83 Loc1<br>STEM | 10FD-early_83 Loc2<br>STEM | 10FD-late_83 Loc1<br>STEM | 10FD-late_83 Loc2<br>STEM | GC_120 p7629 STEM   | GC_120 p10353 STEM | GC_120 Sai110 STEM       |  |
| 7094      | 99             | x    | 2.65 <sup>b-j</sup>      | 3.38 <sup>d-i</sup>        | 2.73 <sup>b-i</sup>        | 4.53                      | 3.98 <sup>b-i</sup>       | 1.48 <sup>a-c</sup> | 2.27 <sup>ab</sup> | 2.50 <sup>ab</sup>       |  |
| 7226      | 104            |      | 2.72 <sup>b-j</sup>      | --                         | --                         | --                        | --                        | 1.85 <sup>a-c</sup> | 2.78 <sup>ab</sup> | 2.35 <sup>ab</sup>       |  |
| 6555      | 84             | x    | 2.89 <sup>b-j</sup>      | 3.80 <sup>a-f</sup>        | 2.48 <sup>b-i</sup>        | 4.75                      | 4.30 <sup>a-f</sup>       | 1.53 <sup>a-c</sup> | 2.10 <sup>ab</sup> | 1.67 <sup>ab</sup>       |  |
| 7444      | 106            |      | 2.92 <sup>b-j</sup>      | --                         | --                         | --                        | --                        | 1.88 <sup>a-c</sup> | 2.24 <sup>ab</sup> | 2.06 <sup>ab</sup>       |  |
| 7471      | 108            | x    | 2.48 <sup>d-j</sup>      | 3.76 <sup>a-h</sup>        | 2.40 <sup>b-i</sup>        | 4.82                      | 3.96 <sup>b-f</sup>       | 1.86 <sup>a-c</sup> | 2.01 <sup>ab</sup> | 2.37 <sup>ab</sup>       |  |
| 5592      | 56             | x    | 2.42 <sup>e-j</sup>      | 3.62 <sup>b-h</sup>        | 2.08 <sup>d-i</sup>        | <b>4.47</b>               | 3.86 <sup>c-f</sup>       | 1.54 <sup>a-c</sup> | 2.18 <sup>ab</sup> | 1.52 <sup>ab</sup>       |  |
| 6215      | 72             | x    | 2.31 <sup>g-j</sup>      | 3.18 <sup>g-i</sup>        | <b>1.67</b> <sup>i</sup>   | 4.88                      | 3.73 <sup>c-f</sup>       | 1.61 <sup>a-c</sup> | 1.98 <sup>ab</sup> | 2.24 <sup>ab</sup>       |  |
| 6497      | 83             | x    | 2.83 <sup>b-j</sup>      | 3.34 <sup>d-i</sup>        | 2.32 <sup>b-i</sup>        | 4.75                      | 3.91 <sup>b-f</sup>       | 1.20 <sup>a-c</sup> | 2.45 <sup>a</sup>  | 2.20 <sup>ab</sup>       |  |
| 6979      | 98             | x    | 2.66 <sup>b-j</sup>      | 3.51 <sup>b-i</sup>        | 2.53 <sup>b-i</sup>        | 5.00                      | 4.18 <sup>a-f</sup>       | 2.12 <sup>a-c</sup> | 2.43 <sup>ab</sup> | 2.33 <sup>ab</sup>       |  |
| 5553      | 55             |      | 3.02 <sup>a-i</sup>      | --                         | --                         | --                        | --                        | 1.75 <sup>a-c</sup> | 2.13 <sup>ab</sup> | 2.29 <sup>ab</sup>       |  |
| 5873      | 65             | x    | 2.55 <sup>b-j</sup>      | 3.54 <sup>b-i</sup>        | 2.48 <sup>b-i</sup>        | 4.81                      | 3.84 <sup>c-f</sup>       | 2.04 <sup>a-c</sup> | 1.99 <sup>ab</sup> | 2.32 <sup>ab</sup>       |  |
| 6941      | 96             | x    | 2.63 <sup>b-j</sup>      | 3.58 <sup>b-h</sup>        | 1.90 <sup>t-i</sup>        | 4.75                      | 3.54 <sup>e-f</sup>       | 1.11 <sup>a-c</sup> | 1.66 <sup>ab</sup> | 1.18 <sup>b</sup>        |  |
| 7459      | 107            | x    | 2.50 <sup>c-j</sup>      | 3.25 <sup>e-i</sup>        | 2.45 <sup>b-i</sup>        | 4.75                      | 3.98 <sup>b-f</sup>       | 1.38 <sup>a-c</sup> | 1.79 <sup>ab</sup> | 1.69 <sup>ab</sup>       |  |
| 6603      | 85             |      | <b>2.02</b> <sup>j</sup> | --                         | --                         | --                        | --                        | 1.82 <sup>a-c</sup> | 2.64 <sup>ab</sup> | 1.59 <sup>ab</sup>       |  |
| 6947      | 97             | x    | 2.10 <sup>ij</sup>       | <b>2.93</b> <sup>i</sup>   | 2.07 <sup>d-i</sup>        | 4.77                      | <b>3.48</b> <sup>f</sup>  | 1.84 <sup>a-c</sup> | 1.81 <sup>ab</sup> | <b>1.03</b> <sup>b</sup> |  |
| 6072      | 70             | x    | 2.76 <sup>b-j</sup>      | 3.49 <sup>b-i</sup>        | 1.98 <sup>e-i</sup>        | 5.00                      | 3.80 <sup>c-f</sup>       | 1.82 <sup>a-c</sup> | 1.65 <sup>ab</sup> | 2.09 <sup>ab</sup>       |  |
| 6927      | 95             | x    | 2.65 <sup>b-j</sup>      | 3.44 <sup>c-i</sup>        | 2.15 <sup>c-i</sup>        | 4.71                      | 3.93 <sup>b-f</sup>       | 1.44 <sup>a-c</sup> | 1.79 <sup>ab</sup> | 2.18 <sup>ab</sup>       |  |
| 7374      | 105            | x    | 2.63 <sup>b-j</sup>      | 3.48 <sup>b-i</sup>        | 2.80 <sup>b-h</sup>        | 4.75                      | 3.91 <sup>b-f</sup>       | 2.05 <sup>a-c</sup> | 2.53 <sup>ab</sup> | 2.39 <sup>ab</sup>       |  |
| 6856      | 93             | x    | 3.29 <sup>a-f</sup>      | 3.59 <sup>b-h</sup>        | 2.58 <sup>b-i</sup>        | 4.71                      | 3.96 <sup>b-f</sup>       | 1.91 <sup>a-c</sup> | 2.59 <sup>ab</sup> | 2.26 <sup>ab</sup>       |  |
| 6900      | 94             | x    | 3.22 <sup>a-g</sup>      | 3.48 <sup>b-i</sup>        | 2.57 <sup>b-i</sup>        | 4.94                      | 3.79 <sup>c-f</sup>       | 1.64 <sup>a-c</sup> | 2.41 <sup>ab</sup> | 1.83 <sup>ab</sup>       |  |

Table S2, cont.

| Line Name | Genotype<br>ID | 2010 | Means Separation        |                            |                            |                           |                           |                     |                    |                    |  |
|-----------|----------------|------|-------------------------|----------------------------|----------------------------|---------------------------|---------------------------|---------------------|--------------------|--------------------|--|
|           |                |      | 09FD_120 Loc1&2<br>STEM | 10FD-early_83 Loc1<br>STEM | 10FD-early_83 Loc2<br>STEM | 10FD-late_83 Loc1<br>STEM | 10FD-late_83 Loc2<br>STEM | GC_120 p7629 STEM   | GC_120 p10353 STEM | GC_120 Sal110 STEM |  |
| 6321      | 79             | x    | 3.42 <sup>a-c</sup>     | 4.08 <sup>ab</sup>         | 3.15 <sup>a-d</sup>        | 5.00                      | 4.46 <sup>a-d</sup>       | 2.51 <sup>ab</sup>  | 1.88 <sup>ab</sup> | 1.89 <sup>ab</sup> |  |
| 6747      | 89             |      | 2.90 <sup>b-j</sup>     | --                         | --                         | --                        | --                        | 1.92 <sup>a-c</sup> | 2.53 <sup>ab</sup> | 1.94 <sup>ab</sup> |  |
| 6328      | 80             | x    | 2.84 <sup>b-j</sup>     | 3.58 <sup>b-h</sup>        | 2.57 <sup>b-i</sup>        | 4.83                      | 4.29 <sup>a-f</sup>       | 1.59 <sup>a-c</sup> | 1.97 <sup>ab</sup> | 2.61 <sup>ab</sup> |  |
| 6681      | 86             |      | 2.74 <sup>b-j</sup>     | --                         | --                         | --                        | --                        | 1.99 <sup>a-c</sup> | 2.39 <sup>ab</sup> | 2.34 <sup>ab</sup> |  |
| 6345      | 81             | x    | 2.97 <sup>a-i</sup>     | 3.66 <sup>b-h</sup>        | 2.90 <sup>a-h</sup>        | 4.65                      | 3.91 <sup>b-f</sup>       | 1.37 <sup>a-c</sup> | 2.18 <sup>ab</sup> | 1.40 <sup>ab</sup> |  |
| 6709      | 87             |      | 2.93 <sup>b-j</sup>     | --                         | --                         | --                        | --                        | 1.95 <sup>a-c</sup> | 2.34 <sup>ab</sup> | 1.85 <sup>ab</sup> |  |
| 6288      | 77             | x    | 3.43 <sup>ab</sup>      | 3.79 <sup>a-g</sup>        | 3.35 <sup>ab</sup>         | 5.00                      | 4.41 <sup>a-e</sup>       | 1.79 <sup>a-c</sup> | 2.33 <sup>ab</sup> | 2.16 <sup>ab</sup> |  |
| 5516      | 54             | x    | 3.17 <sup>a-h</sup>     | 3.66 <sup>b-h</sup>        | 2.70 <sup>b-i</sup>        | 4.75                      | 3.98 <sup>b-f</sup>       | 1.93 <sup>a-c</sup> | 1.58 <sup>ab</sup> | 1.93 <sup>ab</sup> |  |
| 6226      | 73             |      | 3.12 <sup>a-h</sup>     | --                         | --                         | --                        | --                        | 1.55 <sup>a-c</sup> | 1.58 <sup>ab</sup> | 2.25 <sup>ab</sup> |  |
| 6234      | 74             |      | 2.95 <sup>b-i</sup>     | --                         | --                         | --                        | --                        | 1.43 <sup>a-c</sup> | 2.36 <sup>ab</sup> | 2.08 <sup>ab</sup> |  |
| 6423      | 82             |      | 2.28 <sup>h-j</sup>     | --                         | --                         | --                        | --                        | 1.90 <sup>a-c</sup> | 1.86 <sup>ab</sup> | 2.28 <sup>ab</sup> |  |
| 6724      | 88             |      | 2.74 <sup>b-j</sup>     | --                         | --                         | --                        | --                        | 2.35 <sup>ab</sup>  | 2.25 <sup>ab</sup> | 1.45 <sup>ab</sup> |  |
| 7166      | 101            |      | 3.00 <sup>a-i</sup>     | --                         | --                         | --                        | --                        | 1.52 <sup>a-c</sup> | 2.23 <sup>ab</sup> | 1.26 <sup>b</sup>  |  |
| 6261      | 75             | x    | 2.71 <sup>b-j</sup>     | 3.84 <sup>a-f</sup>        | 3.27 <sup>ab</sup>         | 4.84                      | 4.46 <sup>a-d</sup>       | 1.30 <sup>a-c</sup> | 2.20 <sup>ab</sup> | 1.47 <sup>ab</sup> |  |
| 6782      | 90             |      | 2.93 <sup>b-j</sup>     | --                         | --                         | --                        | --                        | 1.88 <sup>a-c</sup> | 2.58 <sup>ab</sup> | 2.15 <sup>ab</sup> |  |
| 5861      | 64             | x    | 2.79 <sup>b-j</sup>     | 3.76 <sup>a-h</sup>        | 3.13 <sup>a-d</sup>        | 4.82                      | 3.98 <sup>b-f</sup>       | 1.45 <sup>a-c</sup> | 2.01 <sup>ab</sup> | 2.37 <sup>ab</sup> |  |
| 6799      | 91             |      | 3.23 <sup>a-g</sup>     | --                         | --                         | --                        | --                        | 1.48 <sup>a-c</sup> | 2.38 <sup>ab</sup> | 2.05 <sup>ab</sup> |  |
| 5616      | 58             | x    | 2.96 <sup>b-i</sup>     | 4.01 <sup>a-c</sup>        | 3.09 <sup>a-d</sup>        | 4.79                      | 4.48 <sup>a-d</sup>       | 1.86 <sup>a-c</sup> | 2.71 <sup>ab</sup> | 2.03 <sup>ab</sup> |  |
| 5920      | 66             |      | 3.25 <sup>a-f</sup>     | --                         | --                         | --                        | --                        | 2.16 <sup>a-c</sup> | 2.20 <sup>ab</sup> | 2.26 <sup>ab</sup> |  |
| 5941      | 67             |      | 3.13 <sup>a-h</sup>     | --                         | --                         | --                        | --                        | 2.43 <sup>a</sup>   | 3.07 <sup>a</sup>  | 1.74 <sup>ab</sup> |  |

Table S2, cont.

| Line Name               | Genotype<br>ID | 2010 | Means Separation        |                            |                            |                           |                           |                         |                          |                    |                    |
|-------------------------|----------------|------|-------------------------|----------------------------|----------------------------|---------------------------|---------------------------|-------------------------|--------------------------|--------------------|--------------------|
|                         |                |      | 09FD_120 Loc1&2<br>STEM | 10FD-early_83 Loc1<br>STEM | 10FD-early_83 Loc2<br>STEM | 10FD-late_83 Loc1<br>STEM | 10FD-late_83 Loc2<br>STEM | GC_120 p7629 STEM       | GC_120 p10353 STEM       | GC_120 Sal10 STEM  |                    |
| 5968                    | 68             |      | 2.85 <sup>b-j</sup>     | --                         | --                         | --                        | --                        | --                      | 1.70 <sup>a-c</sup>      | 2.89 <sup>ab</sup> | 1.93 <sup>ab</sup> |
| 5705                    | 59             | x    | 3.16 <sup>a-h</sup>     | 3.86 <sup>a-e</sup>        | 2.80 <sup>b-h</sup>        | 5.00                      | 4.36 <sup>a-f</sup>       | 1.18 <sup>a-c</sup>     | 2.30 <sup>ab</sup>       | 2.81 <sup>ab</sup> |                    |
| 5722                    | 60             | x    | 2.27 <sup>h-j</sup>     | 3.26 <sup>e-i</sup>        | 2.30 <sup>b-i</sup>        | 4.69                      | 4.00 <sup>a-f</sup>       | <b>0.96<sup>c</sup></b> | 1.87 <sup>ab</sup>       | 1.71 <sup>ab</sup> |                    |
| 6011                    | 69             | x    | 3.89 <sup>a</sup>       | 4.31 <sup>a</sup>          | 3.92 <sup>a</sup>          | 5.00                      | 4.89 <sup>a</sup>         | 1.97 <sup>a-c</sup>     | 2.75 <sup>ab</sup>       | 3.43 <sup>a</sup>  |                    |
| 6302                    | 78             | x    | 2.55 <sup>b-j</sup>     | 3.82 <sup>a-f</sup>        | 3.22 <sup>a-c</sup>        | 4.93                      | 4.63 <sup>a-c</sup>       | 1.83 <sup>a-c</sup>     | 2.48 <sup>ab</sup>       | 1.98 <sup>ab</sup> |                    |
| 5605                    | 57             | x    | 2.80 <sup>b-j</sup>     | 3.72 <sup>a-h</sup>        | 2.98 <sup>a-f</sup>        | 4.94                      | 4.36 <sup>a-f</sup>       | 1.80 <sup>a-c</sup>     | 2.10 <sup>ab</sup>       | 1.73 <sup>ab</sup> |                    |
| 5771                    | 62             | x    | 3.00 <sup>a-i</sup>     | 3.84 <sup>a-f</sup>        | 2.98 <sup>a-f</sup>        | 4.88                      | 4.11 <sup>a-f</sup>       | 1.63 <sup>a-c</sup>     | 1.84 <sup>ab</sup>       | 2.63 <sup>ab</sup> |                    |
| 6094                    | 71             | x    | 2.82 <sup>b-j</sup>     | 3.76 <sup>a-h</sup>        | 3.00 <sup>a-f</sup>        | 4.72                      | 4.09 <sup>a-f</sup>       | 1.85 <sup>a-c</sup>     | 2.23 <sup>ab</sup>       | 1.89 <sup>ab</sup> |                    |
| 6278                    | 76             | x    | 2.96 <sup>a-i</sup>     | 3.66 <sup>b-h</sup>        | 2.52 <sup>b-i</sup>        | 4.88                      | 4.61 <sup>a-c</sup>       | 1.76 <sup>a-c</sup>     | 1.94 <sup>ab</sup>       | 1.75 <sup>ab</sup> |                    |
| 7610                    | 109            | x    | 2.94 <sup>b-j</sup>     | 3.66 <sup>b-h</sup>        | 3.00 <sup>a-f</sup>        | 5.00                      | 4.09 <sup>a-f</sup>       | 1.37 <sup>a-c</sup>     | 2.32 <sup>ab</sup>       | 1.92 <sup>ab</sup> |                    |
| 5726                    | 61             | x    | 2.30 <sup>h-j</sup>     | 3.18 <sup>hi</sup>         | 1.83 <sup>g-i</sup>        | 4.93                      | 3.77 <sup>c-f</sup>       | 1.43 <sup>a-c</sup>     | <b>1.36<sup>ab</sup></b> | 1.95 <sup>ab</sup> |                    |
| 6042                    | 63             | x    | 2.70 <sup>b-j</sup>     | 3.86 <sup>a-e</sup>        | 2.47 <sup>b-i</sup>        | 4.75                      | 4.27 <sup>a-f</sup>       | 2.45 <sup>a</sup>       | 2.65 <sup>ab</sup>       | 2.04 <sup>ab</sup> |                    |
| 6805                    | 92             | x    | 2.80 <sup>b-j</sup>     | 3.84 <sup>a-f</sup>        | 2.93 <sup>a-g</sup>        | 4.74                      | 4.41 <sup>a-e</sup>       | 1.43 <sup>a-c</sup>     | 2.04 <sup>ab</sup>       | 1.92 <sup>ab</sup> |                    |
| <b>Means Separation</b> |                |      | *                       | *                          | *                          | ns                        | *                         | *                       | *                        | *                  |                    |

<sup>a</sup> In Proc MIXED in SAS, means separation are calculated using both the difference between means and the number of replications for each entry. Therefore, letter rankings are not always contiguous.

A double dash (--) indicates that the line was not included in the experiment.

An asterisk (\*) indicates significance at  $P \leq 0.05$  and "ns" indicates not significant.
