# Supplementary material for: Fractionation, Stability, and Isolate-Specificity of QTL for Resistance to Phytophthora infestans in Cultivated Tomato (Solanum lycopersicum)
Source: PubMed Central journal article supplement (PMC3464107; doi:10.1534/g3.112.003459), 2012-10-01
Supplement: supp_2.10.1145_TableS3.pdf [file supp_2.10.1145_TableS3.pdf]

**Table S3 Genotypes and means separation of sub-NILs for chr11**

Means separation is given for all 09FD\_120, GC\_120, and 10FD\_83 traits. Line Name indicates the name of each control or sub-NIL. The four digit designation for each sub-NIL is preceded by "08GH". The "2010" column indicates which lines were included in the 2010 field experiment. In the Genotype section, "A" indicates homozygosity for the *S. lycopersicum* allele and "B" indicates homozygosity for the *S. habrochaites* allele. Trait names are given according to dataset, location or isolate, and trait evaluated. The lowest mean AUDPC for each trait is in bold and underlined.

| Line Name  | Genotype ID | 2010 | Genotype |       |       |    |         |       |         |         |       |         |         |         |         |         |          |         |       | Means Separation |         |         |       |                      |                           |                        |                        |                         |                     |                         |
|------------|-------------|------|----------|-------|-------|----|---------|-------|---------|---------|-------|---------|---------|---------|---------|---------|----------|---------|-------|------------------|---------|---------|-------|----------------------|---------------------------|------------------------|------------------------|-------------------------|---------------------|-------------------------|
|            |             |      | TG194    | T0408 | SSR67 | J1 | At22570 | TG523 | At16710 | U340899 | CT182 | At22260 | At02870 | At44446 | At21690 | At44790 | CLEX4G10 | CLEB7L1 | TG147 | At14260          | At10050 | At04590 | TG400 | 09FD_120 Loc1&2 LEAF | 10FD-early_83 Loc1&2 LEAF | 10FD-late_83 Loc1 LEAF | 10FD-late_83 Loc2 LEAF |                         |                     |                         |
| Hyp45-A    | 121         | x    | A        | A     | A     | A  | A       | A     | A       | A       | A     | A       | A       | A       | A       | A       | A        | A       | A     | A                | A       | A       | A     | A                    | A                         | A                      | 5.54 <sup>a</sup>      | 5.37 <sup>a</sup>       | 6.70 <sup>a-d</sup> | 6.71 <sup>ab</sup>      |
| Hyp45-B    | 122         |      | A        | A     | A     | A  | A       | A     | A       | A       | A     | A       | A       | A       | A       | A       | A        | A       | A     | A                | A       | A       | A     | A                    | A                         | A                      | 5.89 <sup>a</sup>      | --                      | --                  | --                      |
| E6203-A    | 123         | x    | A        | A     | A     | A  | A       | A     | A       | A       | A     | A       | A       | A       | A       | A       | A        | A       | A     | A                | A       | A       | A     | A                    | A                         | A                      | 5.55 <sup>a</sup>      | 5.31 <sup>ab</sup>      | 6.40 <sup>a-g</sup> | 6.89 <sup>a</sup>       |
| E6203-B    | 124         | x    | A        | A     | A     | A  | A       | A     | A       | A       | A     | A       | A       | A       | A       | A       | A        | A       | A     | A                | A       | A       | A     | A                    | A                         | A                      | 5.67 <sup>a</sup>      | 5.10 <sup>a-d</sup>     | 6.50 <sup>a-f</sup> | 6.54 <sup>a-c</sup>     |
| E6203-C    | 129         | x    | A        | A     | A     | A  | A       | A     | A       | A       | A     | A       | A       | A       | A       | A       | A        | A       | A     | A                | A       | A       | A     | A                    | A                         | A                      | --                     | 5.04 <sup>a-d</sup>     | 6.40 <sup>a-g</sup> | 6.48 <sup>a-c</sup>     |
| E6203-D    | 130         | x    | A        | A     | A     | A  | A       | A     | A       | A       | A     | A       | A       | A       | A       | A       | A        | A       | A     | A                | A       | A       | A     | A                    | A                         | A                      | --                     | 5.07 <sup>a-d</sup>     | 6.00 <sup>b-g</sup> | 6.71 <sup>ab</sup>      |
| LB11-NIL-A | 126         | x    | B        | B     | B     | B  | B       | B     | B       | B       | B     | B       | B       | B       | B       | B       | B        | B       | B     | B                | B       | B       | B     | B                    | B                         | B                      | 4.95 <sup>ab</sup>     | 4.35 <sup>f-h</sup>     | 5.90 <sup>c-g</sup> | 6.05 <sup>a-c</sup>     |
| LB11-NIL-B | 128         | x    | B        | B     | B     | B  | B       | B     | B       | B       | B     | B       | B       | B       | B       | B       | B        | B       | B     | B                | B       | B       | B     | B                    | B                         | B                      | --                     | <b>4.15<sup>h</sup></b> | 5.60 <sup>fg</sup>  | <b>5.52<sup>c</sup></b> |
| 3951       | 9           | x    | B        | A     | A     | A  | A       | A     | A       | A       | A     | A       | A       | A       | A       | A       | A        | A       | A     | A                | A       | A       | A     | A                    | A                         | A                      | 5.45 <sup>ab</sup>     | 4.62 <sup>c-h</sup>     | 6.40 <sup>a-g</sup> | 5.95 <sup>a-c</sup>     |
| 5103       | 42          |      | B        | A     | A     | A  | A       | A     | A       | A       | A     | A       | A       | A       | A       | A       | A        | A       | A     | A                | A       | A       | A     | A                    | A                         | A                      | 5.56 <sup>a</sup>      | --                      | --                  | --                      |
| 4228       | 16          | x    | B        | B     | A     | A  | A       | A     | A       | A       | A     | A       | A       | A       | A       | A       | A        | A       | A     | A                | A       | A       | A     | A                    | A                         | A                      | 4.76 <sup>ab</sup>     | 4.89 <sup>a-f</sup>     | 6.50 <sup>a-f</sup> | 6.25 <sup>a-c</sup>     |
| 3999       | 11          | x    | B        | B     | B     | A  | A       | A     | A       | A       | A     | A       | A       | A       | A       | A       | A        | A       | A     | A                | A       | A       | A     | A                    | A                         | A                      | 4.97 <sup>ab</sup>     | 4.21 <sup>gh</sup>      | 6.00 <sup>b-g</sup> | 6.18 <sup>a-c</sup>     |
| 4945       | 35          |      | B        | B     | B     | A  | A       | A     | A       | A       | A     | A       | A       | A       | A       | A       | A        | A       | A     | A                | A       | A       | A     | A                    | A                         | A                      | 5.61 <sup>a</sup>      | --                      | --                  | --                      |
| 3892       | 8           | x    | B        | B     | B     | B  | A       | A     | A       | A       | A     | A       | A       | A       | A       | A       | A        | A       | A     | A                | A       | A       | A     | A                    | A                         | A                      | 5.59 <sup>a</sup>      | 5.17 <sup>a-c</sup>     | 6.80 <sup>a-c</sup> | 6.54 <sup>a-c</sup>     |

Table S3, cont.

| Line Name | Genotype ID | 2010 | Genotype |       |       |    |         |       |         |         |       |         |         |         |         |         |          |         |       | Means Separation |         |         |       |                      |                           |                        |                        |                     |
|-----------|-------------|------|----------|-------|-------|----|---------|-------|---------|---------|-------|---------|---------|---------|---------|---------|----------|---------|-------|------------------|---------|---------|-------|----------------------|---------------------------|------------------------|------------------------|---------------------|
|           |             |      | TG194    | T0408 | SSR67 | J1 | At22570 | TG523 | At16710 | U340899 | CT182 | At22260 | At02870 | At44446 | At21690 | At44790 | cLEX4G10 | cLEB7L1 | TG147 | At14260          | At10050 | At04590 | TG400 | 09FD_120 Loc1&2 LEAF | 10FD-early_83 Loc1&2 LEAF | 10FD-late_83 Loc1 LEAF | 10FD-late_83 Loc2 LEAF |                     |
| 3969      | 10          | x    | B        | B     | B     | B  | B       | B     | A       | A       | A     | A       | A       | A       | A       | A       | A        | A       | A     | A                | A       | A       | A     | A                    | 5.77 <sup>a</sup>         | 5.05 <sup>a-d</sup>    | 6.70 <sup>a-d</sup>    | 6.71 <sup>ab</sup>  |
| 4257      | 17          |      | B        | B     | B     | B  | B       | B     | A       | A       | A     | A       | A       | A       | A       | A       | A        | A       | A     | A                | A       | A       | A     | A                    | 5.52 <sup>a</sup>         | --                     | --                     | --                  |
| 4940      | 34          |      | B        | B     | B     | B  | B       | B     | A       | A       | A     | A       | A       | A       | A       | A       | A        | A       | A     | A                | A       | A       | A     | A                    | 5.62 <sup>a</sup>         | --                     | --                     | --                  |
| 7717      | 110         | x    | B        | B     | B     | B  | B       | B     | B       | A       | A     | A       | A       | A       | A       | A       | A        | A       | A     | A                | A       | A       | A     | A                    | 5.69 <sup>a</sup>         | 4.90 <sup>a-f</sup>    | 6.40 <sup>a-g</sup>    | 6.95 <sup>a</sup>   |
| 7731      | 111         |      | B        | B     | B     | B  | B       | B     | B       | A       | A     | A       | A       | A       | A       | A       | A        | A       | A     | A                | A       | A       | A     | A                    | 5.60 <sup>a</sup>         | --                     | --                     | --                  |
| 4265      | 18          | x    | B        | B     | B     | B  | B       | B     | B       | B       | A     | A       | A       | A       | A       | A       | A        | A       | A     | A                | A       | A       | A     | A                    | 5.24 <sup>ab</sup>        | 4.75 <sup>a-h</sup>    | 6.40 <sup>a-g</sup>    | 6.66 <sup>a-c</sup> |
| 4290      | 19          |      | B        | B     | B     | B  | B       | B     | B       | B       | A     | A       | A       | A       | A       | A       | A        | A       | A     | A                | A       | A       | A     | A                    | 5.19 <sup>ab</sup>        | --                     | --                     | --                  |
| 5224      | 45          |      | B        | B     | B     | B  | B       | B     | B       | B       | A     | A       | A       | A       | A       | A       | A        | A       | A     | A                | A       | A       | A     | A                    | 5.77 <sup>a</sup>         | --                     | --                     | --                  |
| 7852      | 116         | x    | B        | B     | B     | B  | B       | B     | B       | B       | B     | A       | A       | A       | A       | A       | A        | A       | A     | A                | A       | A       | A     | A                    | 5.26 <sup>ab</sup>        | 4.62 <sup>c-h</sup>    | 6.10 <sup>a-g</sup>    | 6.66 <sup>a-c</sup> |
| 3827      | 6           | x    | B        | B     | B     | B  | B       | B     | B       | B       | B     | B       | A       | A       | A       | A       | A        | A       | A     | A                | A       | A       | A     | A                    | 5.26 <sup>ab</sup>        | 5.10 <sup>a-d</sup>    | 6.80 <sup>a-c</sup>    | 6.59 <sup>a-c</sup> |
| 4659      | 24          |      | B        | B     | B     | B  | B       | B     | B       | B       | B     | B       | A       | A       | A       | A       | A        | A       | A     | A                | A       | A       | A     | A                    | 5.39 <sup>ab</sup>        | --                     | --                     | --                  |
| 4305      | 20          | x    | B        | B     | B     | B  | B       | B     | B       | B       | B     | B       | B       | A       | A       | A       | A        | A       | A     | A                | A       | A       | A     | A                    | 4.98 <sup>ab</sup>        | 4.70 <sup>b-h</sup>    | 6.40 <sup>a-g</sup>    | 6.36 <sup>a-c</sup> |
| 7743      | 112         |      | B        | B     | B     | B  | B       | B     | B       | B       | B     | B       | B       | A       | A       | A       | A        | A       | A     | A                | A       | A       | A     | A                    | 5.46 <sup>ab</sup>        | --                     | --                     | --                  |
| 7766      | 113         | x    | B        | B     | B     | B  | B       | B     | B       | B       | B     | B       | B       | B       | B       | A       | A        | A       | A     | A                | A       | A       | A     | A                    | 5.45 <sup>ab</sup>        | 4.97 <sup>a-f</sup>    | 6.40 <sup>a-g</sup>    | 6.89 <sup>a</sup>   |
| 7868      | 117         | x    | B        | B     | B     | B  | B       | B     | B       | B       | B     | B       | B       | B       | B       | A       | A        | A       | A     | A                | A       | A       | A     | A                    | 5.38 <sup>ab</sup>        | 4.77 <sup>a-h</sup>    | 6.70 <sup>a-d</sup>    | 5.88 <sup>a-c</sup> |
| 4718      | 25          | x    | B        | B     | B     | B  | B       | B     | B       | B       | B     | B       | B       | B       | B       | B       | A        | A       | A     | A                | A       | A       | A     | A                    | 5.53 <sup>a</sup>         | 4.84 <sup>a-g</sup>    | 6.50 <sup>a-f</sup>    | 6.13 <sup>a-c</sup> |
| 4759      | 26          | x    | B        | B     | B     | B  | B       | B     | B       | B       | B     | B       | B       | B       | B       | B       | A        | A       | A     | A                | A       | A       | A     | A                    | 5.67 <sup>a</sup>         | 4.90 <sup>a-f</sup>    | 6.70 <sup>a-d</sup>    | 6.23 <sup>a-c</sup> |
| 5339      | 48          | x    | B        | B     | B     | B  | B       | B     | B       | B       | B     | B       | B       | B       | B       | B       | A        | A       | A     | A                | A       | A       | A     | A                    | 5.65 <sup>a</sup>         | 4.90 <sup>a-f</sup>    | 6.40 <sup>a-g</sup>    | 6.48 <sup>a-c</sup> |
| 4969      | 37          | x    | B        | B     | B     | B  | B       | B     | B       | B       | B     | B       | B       | B       | B       | B       | B        | B       | A     | A                | A       | A       | A     | A                    | 5.22 <sup>ab</sup>        | 4.66 <sup>c-h</sup>    | 6.40 <sup>a-g</sup>    | 5.93 <sup>a-c</sup> |
| 7799      | 114         |      | B        | B     | B     | B  | B       | B     | B       | B       | B     | B       | B       | B       | B       | B       | B        | B       | A     | A                | A       | A       | A     | A                    | 4.74 <sup>ab</sup>        | --                     | --                     | --                  |



Table S3, cont.

| Line Name        | Genotype ID | 2010 | Genotype |       |       |    |         |       |         |         |       |         |         |         |         |         |          |         |       | Means Separation |         |         |       |                      |                           |                        |                        |                     |                         |                     |
|------------------|-------------|------|----------|-------|-------|----|---------|-------|---------|---------|-------|---------|---------|---------|---------|---------|----------|---------|-------|------------------|---------|---------|-------|----------------------|---------------------------|------------------------|------------------------|---------------------|-------------------------|---------------------|
|                  |             |      | TG194    | T0408 | SSR67 | J1 | At22570 | TG523 | At16710 | U340899 | CT182 | At22260 | At02870 | At44446 | At21690 | At44790 | cLEX4G10 | cLEB7L1 | TG147 | At14260          | At10050 | At04590 | TG400 | 09FD_120 Loc1&2 LEAF | 10FD-early_83 Loc1&2 LEAF | 10FD-late_83 Loc1 LEAF | 10FD-late_83 Loc2 LEAF |                     |                         |                     |
| 4106             | 14          | x    | A        | A     | A     | A  | A       | A     | A       | A       | A     | A       | A       | A       | B       | B       | B        | B       | B     | B                | B       | B       | B     | B                    | B                         | B                      | 4.93 <sup>ab</sup>     | 4.16 <sup>h</sup>   | 5.90 <sup>c-g</sup>     | 6.00 <sup>a-c</sup> |
| 4925             | 33          | x    | A        | A     | A     | A  | A       | A     | A       | A       | A     | A       | A       | A       | A       | B       | B        | B       | B     | B                | B       | B       | B     | B                    | B                         | B                      | 5.19 <sup>ab</sup>     | 4.93 <sup>a-f</sup> | 6.90 <sup>ab</sup>      | 6.59 <sup>a-c</sup> |
| 4498             | 22          | x    | A        | A     | A     | A  | A       | A     | A       | A       | A     | A       | A       | A       | A       | A       | B        | B       | B     | B                | B       | B       | B     | B                    | B                         | B                      | 4.92 <sup>ab</sup>     | 5.04 <sup>a-d</sup> | 6.60 <sup>a-e</sup>     | 6.30 <sup>a-c</sup> |
| 3723             | 2           | x    | A        | A     | A     | A  | A       | A     | A       | A       | A     | A       | A       | A       | A       | A       | B        | B       | B     | B                | B       | B       | B     | B                    | B                         | B                      | 4.88 <sup>ab</sup>     | 4.34 <sup>f-h</sup> | 6.20 <sup>a-g</sup>     | 6.13 <sup>a-c</sup> |
| 4794             | 27          | x    | A        | A     | A     | A  | A       | A     | A       | A       | A     | A       | A       | A       | A       | A       | B        | B       | B     | B                | B       | B       | B     | B                    | B                         | B                      | 5.03 <sup>ab</sup>     | 4.76 <sup>a-h</sup> | 6.10 <sup>a-g</sup>     | 6.71 <sup>ab</sup>  |
| 4802             | 28          | x    | A        | A     | A     | A  | A       | A     | A       | A       | A     | A       | A       | A       | A       | A       | A        | B       | B     | B                | B       | B       | B     | B                    | B                         | B                      | 4.93 <sup>ab</sup>     | 5.03 <sup>a-d</sup> | 6.70 <sup>a-d</sup>     | 5.95 <sup>a-c</sup> |
| 5245             | 46          | x    | A        | A     | A     | A  | A       | A     | A       | A       | A     | A       | A       | A       | A       | A       | A        | B       | B     | B                | B       | B       | B     | B                    | B                         | B                      | 5.20 <sup>ab</sup>     | 4.76 <sup>a-h</sup> | 6.30 <sup>a-g</sup>     | 6.18 <sup>a-c</sup> |
| 3740             | 3           | x    | A        | A     | A     | A  | A       | A     | A       | A       | A     | A       | A       | A       | A       | A       | A        | A       | A     | B                | B       | B       | B     | B                    | B                         | B                      | 4.65 <sup>ab</sup>     | 4.51 <sup>d-h</sup> | 6.50 <sup>a-f</sup>     | 6.30 <sup>a-c</sup> |
| 5285             | 47          | x    | A        | A     | A     | A  | A       | A     | A       | A       | A     | A       | A       | A       | A       | A       | A        | A       | A     | B                | B       | B       | B     | B                    | B                         | B                      | 4.93 <sup>ab</sup>     | 4.73 <sup>b-h</sup> | 6.40 <sup>a-g</sup>     | 6.43 <sup>a-c</sup> |
| 3765             | 4           | x    | A        | A     | A     | A  | A       | A     | A       | A       | A     | A       | A       | A       | A       | A       | A        | A       | A     | A                | A       | A       | B     | B                    | B                         | B                      | 4.97 <sup>ab</sup>     | 4.48 <sup>d-h</sup> | 6.30 <sup>a-g</sup>     | 6.05 <sup>a-c</sup> |
| 4897             | 31          | x    | A        | A     | A     | A  | A       | A     | A       | A       | A     | A       | A       | A       | A       | A       | A        | A       | A     | A                | A       | A       | B     | B                    | B                         | B                      | 5.04 <sup>ab</sup>     | 4.47 <sup>d-h</sup> | <b>5.50<sup>g</sup></b> | 5.82 <sup>a-c</sup> |
| 5362             | 49          | x    | A        | A     | A     | A  | A       | A     | A       | A       | A     | A       | A       | A       | A       | A       | A        | A       | A     | A                | A       | A       | B     | B                    | B                         | B                      | 4.82 <sup>ab</sup>     | 4.82 <sup>a-g</sup> | 6.50 <sup>a-f</sup>     | 6.07 <sup>a-c</sup> |
| 4877             | 30          | x    | A        | A     | A     | A  | A       | A     | A       | A       | A     | A       | A       | A       | A       | A       | A        | A       | A     | A                | A       | A       | A     | B                    | B                         | B                      | 5.18 <sup>ab</sup>     | 4.82 <sup>a-g</sup> | 7.00 <sup>a</sup>       | 6.54 <sup>a-c</sup> |
| 8009             | 119         | x    | A        | A     | A     | A  | A       | A     | A       | A       | A     | A       | A       | A       | A       | A       | A        | A       | A     | A                | A       | A       | A     | B                    | B                         | B                      | 4.80 <sup>ab</sup>     | 4.69 <sup>b-h</sup> | 6.60 <sup>a-e</sup>     | 6.36 <sup>a-c</sup> |
| 3814             | 5           |      | A        | A     | A     | A  | A       | A     | A       | A       | A     | A       | A       | A       | A       | A       | A        | A       | A     | A                | A       | A       | A     | A                    | A                         | A                      | 5.98 <sup>a</sup>      | --                  | --                      | --                  |
| Means Separation |             |      |          |       |       |    |         |       |         |         |       |         |         |         |         |         |          |         |       |                  |         |         |       |                      |                           | *                      | *                      | *                   | *                       |                     |

Table S3, cont.

| Line Name  | Genotype<br>ID | 2010 | Means Separation   |                     |                   |                         |                         |                         |                         |                        |                    |                    |                     |                     |                     |
|------------|----------------|------|--------------------|---------------------|-------------------|-------------------------|-------------------------|-------------------------|-------------------------|------------------------|--------------------|--------------------|---------------------|---------------------|---------------------|
|            |                |      | GC_120 p7629 LEAF  | GC_120 p10353 LEAF  | GC_120 Sal10 LEAF | 09FD_120 Loc1&2 STEM    | 10FD-early_83 Loc1 STEM | 10FD-early_83 Loc2 STEM | 10FD-late_83 Loc1 STEM  | 10FD-late_83 Loc2 STEM | GC_120 p7629 STEM  | GC_120 p10353 STEM | GC_1_120 Sal10 STEM | GC-2_120 Sal10 STEM | GC-3_120 Sal10 STEM |
| Hyp45-A    | 121            | x    | 3.75 <sup>a</sup>  | 4.45 <sup>a</sup>   | 4.08              | 3.38 <sup>ab</sup>      | 3.78 <sup>b-e</sup>     | 3.02 <sup>a-d</sup>     | 4.90 <sup>a</sup>       | 4.79 <sup>ab</sup>     | 2.26 <sup>a</sup>  | 2.45               | 2.03                | 2.45                | 1.77 <sup>ab</sup>  |
| Hyp45-B    | 122            |      | --                 | --                  | --                | 3.37 <sup>a-c</sup>     | --                      | --                      | --                      | --                     | --                 | --                 | --                  | --                  | --                  |
| E6203-A    | 123            | x    | --                 | --                  | --                | 2.61 <sup>bc</sup>      | 3.68 <sup>c-e</sup>     | 2.70 <sup>b-d</sup>     | 4.69 <sup>ab</sup>      | 4.53 <sup>a-d</sup>    | --                 | --                 | --                  | --                  | --                  |
| E6203-B    | 124            | x    | 3.41 <sup>ab</sup> | 4.25 <sup>a-c</sup> | 3.87              | 2.64 <sup>bc</sup>      | 3.78 <sup>b-e</sup>     | 2.70 <sup>b-d</sup>     | 4.56 <sup>ab</sup>      | 4.18 <sup>a-d</sup>    | 1.80 <sup>ab</sup> | 2.19               | 1.76                | 2.22                | 1.70 <sup>ab</sup>  |
| E6203-C    | 129            | x    | --                 | --                  | --                | --                      | 3.64 <sup>c-e</sup>     | 2.75 <sup>b-d</sup>     | 4.71 <sup>ab</sup>      | 4.62 <sup>a-d</sup>    | --                 | --                 | --                  | --                  | --                  |
| E6203-D    | 130            | x    | --                 | --                  | --                | --                      | 3.56 <sup>c-e</sup>     | 2.38 <sup>de</sup>      | 4.47 <sup>ab</sup>      | 4.33 <sup>a-d</sup>    | --                 | --                 | --                  | --                  | --                  |
| LB11-NIL-A | 126            | x    | 3.15 <sup>b</sup>  | 3.55 <sup>bc</sup>  | 3.47              | 2.75 <sup>a-c</sup>     | 3.64 <sup>c-e</sup>     | 2.66 <sup>b-d</sup>     | 4.21 <sup>ab</sup>      | 3.88 <sup>b-d</sup>    | 1.34 <sup>b</sup>  | 1.77               | 1.49                | 2.25                | 1.66 <sup>b</sup>   |
| LB11-NIL-B | 128            | x    | --                 | --                  | --                | --                      | 3.62 <sup>c-e</sup>     | 2.50 <sup>cd</sup>      | <b>4.07<sup>b</sup></b> | 3.79 <sup>cd</sup>     | --                 | --                 | --                  | --                  | --                  |
| 3951       | 9              | x    | 3.83 <sup>ab</sup> | 4.80 <sup>a-c</sup> | 4.29              | 2.95 <sup>a-c</sup>     | 3.59 <sup>c-e</sup>     | 2.85 <sup>a-d</sup>     | 4.26 <sup>ab</sup>      | 3.83 <sup>cd</sup>     | 1.93 <sup>ab</sup> | 2.42               | 2.39                | 3.05                | 1.68 <sup>ab</sup>  |
| 5103       | 42             |      | 3.25 <sup>ab</sup> | 3.43 <sup>a-c</sup> | 4.62              | <b>2.33<sup>c</sup></b> | --                      | --                      | --                      | --                     | 1.53 <sup>ab</sup> | 1.47               | 2.42                | 2.84                | 1.93 <sup>ab</sup>  |
| 4228       | 16             | x    | 3.00 <sup>ab</sup> | 3.75 <sup>a-c</sup> | 4.10              | 2.84 <sup>a-c</sup>     | 3.41 <sup>c-e</sup>     | <b>1.27<sup>e</sup></b> | 4.36 <sup>ab</sup>      | 3.96 <sup>b-d</sup>    | 1.90 <sup>ab</sup> | 1.79               | 1.44                | 3.81                | 0.86 <sup>b</sup>   |
| 3999       | 11             | x    | 3.29 <sup>ab</sup> | 4.48 <sup>a-c</sup> | 4.33              | 2.90 <sup>a-c</sup>     | <b>3.26<sup>e</sup></b> | 2.28 <sup>de</sup>      | 4.28 <sup>ab</sup>      | 3.91 <sup>b-d</sup>    | 1.69 <sup>ab</sup> | 2.34               | 1.53                | 2.01                | 1.95 <sup>ab</sup>  |
| 4945       | 35             |      | 3.64 <sup>ab</sup> | 4.12 <sup>a-c</sup> | 4.16              | 2.92 <sup>a-c</sup>     | --                      | --                      | --                      | --                     | 1.31 <sup>ab</sup> | 2.10               | 2.19                | 2.25                | 1.41 <sup>ab</sup>  |
| 3892       | 8              | x    | 3.21 <sup>ab</sup> | 4.43 <sup>a-c</sup> | 4.55              | 2.69 <sup>bc</sup>      | 3.53 <sup>c-e</sup>     | 2.10 <sup>de</sup>      | 4.56 <sup>ab</sup>      | 4.11 <sup>a-d</sup>    | 1.70 <sup>ab</sup> | 2.41               | 2.34                | 2.74                | 1.78 <sup>ab</sup>  |

Table S3, cont.

| Line Name | Genotype ID | 2010 | Means Separation   |                         |                   |                      |                         |                         |                        |                        |                    |                    |                     |                     |                         |
|-----------|-------------|------|--------------------|-------------------------|-------------------|----------------------|-------------------------|-------------------------|------------------------|------------------------|--------------------|--------------------|---------------------|---------------------|-------------------------|
|           |             |      | GC_120 p7629 LEAF  | GC_120 p10353 LEAF      | GC_120 Sal10 LEAF | 09FD_120 Loc1&2 STEM | 10FD-early_83 Loc1 STEM | 10FD-early_83 Loc2 STEM | 10FD-late_83 Loc1 STEM | 10FD-late_83 Loc2 STEM | GC_120 p7629 STEM  | GC_120 p10353 STEM | GC-1_120 Sal10 STEM | GC-2_120 Sal10 STEM | GC-3_120 Sal10 STEM     |
| 3969      | 10          | x    | 3.59 <sup>ab</sup> | 3.88 <sup>a-c</sup>     | 3.44              | 3.55 <sup>ab</sup>   | 3.70 <sup>c-e</sup>     | 2.48 <sup>cd</sup>      | 4.69 <sup>ab</sup>     | 4.46 <sup>a-d</sup>    | 2.14 <sup>ab</sup> | 1.77               | 1.02                | 2.09                | 2.32 <sup>ab</sup>      |
| 4257      | 17          |      | 3.62 <sup>ab</sup> | 4.43 <sup>a-c</sup>     | 4.77              | 3.22 <sup>a-c</sup>  | --                      | --                      | --                     | --                     | 2.01 <sup>ab</sup> | 2.42               | 2.83                | 3.25                | 2.19 <sup>ab</sup>      |
| 4940      | 34          |      | 3.53 <sup>ab</sup> | 4.06 <sup>a-c</sup>     | 4.15              | 2.59 <sup>bc</sup>   | --                      | --                      | --                     | --                     | 1.55 <sup>ab</sup> | 2.39               | 1.81                | 2.49                | 2.32 <sup>ab</sup>      |
| 7717      | 110         | x    | 3.66 <sup>ab</sup> | 3.90 <sup>a-c</sup>     | 3.38              | 3.26 <sup>a-c</sup>  | 3.62 <sup>c-e</sup>     | 2.77 <sup>b-d</sup>     | 4.71 <sup>ab</sup>     | 4.70 <sup>a-c</sup>    | 2.30 <sup>ac</sup> | 2.18               | 1.61                | 1.89                | 2.28 <sup>ab</sup>      |
| 7731      | 111         |      | 3.66 <sup>ab</sup> | 4.35 <sup>a-c</sup>     | 3.90              | 3.31 <sup>a-c</sup>  | --                      | --                      | --                     | --                     | 1.96 <sup>ab</sup> | 2.88               | 1.44                | 2.29                | 1.85 <sup>ab</sup>      |
| 4265      | 18          | x    | 3.26 <sup>ab</sup> | 4.05 <sup>a-c</sup>     | 3.88              | 3.21 <sup>a-c</sup>  | 3.59 <sup>c-e</sup>     | 2.80 <sup>b-d</sup>     | 4.68 <sup>ab</sup>     | 4.79 <sup>ab</sup>     | 1.67 <sup>ab</sup> | 2.09               | 1.82                | 2.59                | 1.14 <sup>ab</sup>      |
| 4290      | 19          |      | 3.21 <sup>ab</sup> | 4.00 <sup>a-c</sup>     | 4.53              | 2.53 <sup>bc</sup>   | --                      | --                      | --                     | --                     | 1.62 <sup>ab</sup> | 2.02               | 1.51                | 3.33                | 2.25 <sup>ab</sup>      |
| 5224      | 45          |      | 3.30 <sup>ab</sup> | 4.24 <sup>a-c</sup>     | 3.75              | 2.60 <sup>bc</sup>   | --                      | --                      | --                     | --                     | 1.70 <sup>ab</sup> | 2.10               | 1.93                | 3.29                | 1.34 <sup>ab</sup>      |
| 7852      | 116         | x    | 2.94 <sup>ab</sup> | 3.55 <sup>a-c</sup>     | 3.22              | 3.40 <sup>ab</sup>   | 3.94 <sup>a-c</sup>     | 2.70 <sup>b-d</sup>     | 4.40 <sup>ab</sup>     | 3.78 <sup>cd</sup>     | 1.43 <sup>ab</sup> | 1.91               | 0.90                | 1.49                | 1.01 <sup>b</sup>       |
| 3827      | 6           | x    | 3.90 <sup>ab</sup> | 4.17 <sup>a-c</sup>     | 4.57              | 3.02 <sup>a-c</sup>  | 3.69 <sup>c-e</sup>     | 3.02 <sup>a-d</sup>     | 4.85 <sup>a</sup>      | 4.79 <sup>ab</sup>     | 2.07 <sup>ab</sup> | 2.29               | 2.13                | 3.39                | 2.25 <sup>ab</sup>      |
| 4659      | 24          |      | 3.20 <sup>ab</sup> | <b>3.00<sup>c</sup></b> | 3.49              | 2.91 <sup>a-c</sup>  | --                      | --                      | --                     | --                     | 1.83 <sup>ab</sup> | <b>1.20</b>        | 2.41                | 2.86                | 0.79 <sup>b</sup>       |
| 4305      | 20          | x    | 3.48 <sup>ab</sup> | 4.16 <sup>a-c</sup>     | 4.58              | 2.56 <sup>bc</sup>   | 3.78 <sup>b-e</sup>     | 2.85 <sup>a-d</sup>     | 4.52 <sup>ab</sup>     | 4.13 <sup>a-d</sup>    | 2.00 <sup>ab</sup> | 2.11               | 2.48                | 3.78                | 2.52 <sup>ab</sup>      |
| 7743      | 112         |      | 3.61 <sup>ab</sup> | 4.04 <sup>a-c</sup>     | 4.98              | 2.98 <sup>a-c</sup>  | --                      | --                      | --                     | --                     | 1.97 <sup>ab</sup> | 2.22               | 1.75                | 2.44                | 2.32 <sup>ab</sup>      |
| 7766      | 113         | x    | 3.88 <sup>ab</sup> | 4.04 <sup>a-c</sup>     | 3.73              | 2.88 <sup>a-c</sup>  | 3.59 <sup>c-e</sup>     | 2.30 <sup>de</sup>      | 4.74 <sup>ab</sup>     | 4.62 <sup>a-d</sup>    | 2.18 <sup>ab</sup> | 2.12               | 2.29                | 2.17                | <b>0.55<sup>b</sup></b> |
| 7868      | 117         | x    | 3.27 <sup>ab</sup> | 4.03 <sup>a-c</sup>     | 3.02              | 2.64 <sup>bc</sup>   | 3.52 <sup>c-e</sup>     | 2.63 <sup>cd</sup>      | 4.41 <sup>ab</sup>     | 3.86 <sup>b-d</sup>    | 1.87 <sup>ab</sup> | 2.63               | 0.87                | 1.58                | 1.95 <sup>ab</sup>      |
| 4718      | 25          | x    | 3.26 <sup>ab</sup> | 3.79 <sup>a-c</sup>     | 4.48              | 2.76 <sup>a-c</sup>  | 3.71 <sup>c-e</sup>     | 2.60 <sup>cd</sup>      | 4.66 <sup>ab</sup>     | 4.20 <sup>a-d</sup>    | 1.33 <sup>ab</sup> | 1.88               | 1.54                | 2.94                | 1.26 <sup>ab</sup>      |
| 4759      | 26          | x    | 3.48 <sup>ab</sup> | 3.35 <sup>a-c</sup>     | 2.97              | 3.41 <sup>ab</sup>   | 3.59 <sup>c-e</sup>     | 2.92 <sup>a-d</sup>     | 4.54 <sup>ab</sup>     | 4.27 <sup>a-d</sup>    | 2.14 <sup>ab</sup> | 2.03               | 1.44                | 1.37                | 1.04 <sup>ab</sup>      |
| 5339      | 48          | x    | 3.17 <sup>ab</sup> | 4.30 <sup>a-c</sup>     | 3.53              | 2.92 <sup>a-c</sup>  | 3.68 <sup>c-e</sup>     | 2.55 <sup>cd</sup>      | 4.60 <sup>ab</sup>     | 4.34 <sup>a-d</sup>    | 1.48 <sup>ab</sup> | 2.16               | 1.32                | 3.48                | 1.28 <sup>ab</sup>      |
| 4969      | 37          | x    | 3.02 <sup>ab</sup> | 3.30 <sup>a-c</sup>     | 3.62              | 3.04 <sup>a-c</sup>  | 3.36 <sup>de</sup>      | 2.98 <sup>a-d</sup>     | 4.58 <sup>ab</sup>     | 4.29 <sup>a-d</sup>    | 1.51 <sup>ab</sup> | 1.65               | 1.15                | 2.36                | 0.63 <sup>b</sup>       |
| 7799      | 114         |      | 3.31 <sup>ab</sup> | 3.83 <sup>a-c</sup>     | 3.58              | 3.16 <sup>a-c</sup>  | --                      | --                      | --                     | --                     | 1.60 <sup>ab</sup> | 2.09               | 2.34                | 2.12                | 0.88 <sup>b</sup>       |

Table S3, cont.

| Line Name | Genotype ID | 2010 | Means Separation   |                     |                   |                      |                         |                         |                        |                        |                          |                    |                     |                     |                     |
|-----------|-------------|------|--------------------|---------------------|-------------------|----------------------|-------------------------|-------------------------|------------------------|------------------------|--------------------------|--------------------|---------------------|---------------------|---------------------|
|           |             |      | GC_120 p7629 LEAF  | GC_120 p10353 LEAF  | GC_120 Sal10 LEAF | 09FD_120 Loc1&2 STEM | 10FD-early_83 Loc1 STEM | 10FD-early_83 Loc2 STEM | 10FD-late_83 Loc1 STEM | 10FD-late_83 Loc2 STEM | GC_120 p7629 STEM        | GC_120 p10353 STEM | GC-1_120 Sal10 STEM | GC-2_120 Sal10 STEM | GC-3_120 Sal10 STEM |
| 3845      | 7           | x    | 3.23 <sup>ab</sup> | 3.94 <sup>a-c</sup> | 3.48              | 3.31 <sup>a-c</sup>  | 3.74 <sup>c-c</sup>     | 2.95 <sup>b-d</sup>     | 4.71 <sup>ab</sup>     | 4.55 <sup>b-d</sup>    | 1.50 <sup>ab</sup>       | 2.10               | 1.81                | 1.92                | 2.14 <sup>ab</sup>  |
| 4961      | 36          |      | 3.18 <sup>ab</sup> | 4.14 <sup>a-c</sup> | 4.17              | 2.96 <sup>a-c</sup>  | --                      | --                      | --                     | --                     | 1.68 <sup>ab</sup>       | 2.32               | 3.36                | 1.72                | 1.78 <sup>ab</sup>  |
| 7952      | 118         |      | 3.14 <sup>ab</sup> | 4.00 <sup>a-c</sup> | 3.41              | 3.25 <sup>a-c</sup>  | --                      | --                      | --                     | --                     | 1.97 <sup>ab</sup>       | 1.94               | 2.70                | <b>0.91</b>         | 2.28 <sup>ab</sup>  |
| 5385      | 50          | x    | 2.96 <sup>ab</sup> | 4.15 <sup>a-c</sup> | 4.06              | 3.16 <sup>a-c</sup>  | 3.64 <sup>c-e</sup>     | 2.65 <sup>b-d</sup>     | 4.38 <sup>ab</sup>     | 3.94 <sup>b-d</sup>    | 1.36 <sup>ab</sup>       | 2.58               | 1.85                | 3.70                | 1.05 <sup>ab</sup>  |
| 5422      | 51          |      | 3.46 <sup>ab</sup> | 4.21 <sup>a-c</sup> | 4.37              | 2.80 <sup>a-c</sup>  | --                      | --                      | --                     | --                     | 2.04 <sup>ab</sup>       | 2.14               | 2.55                | 3.45                | 2.42 <sup>ab</sup>  |
| 4993      | 38          | x    | 3.19 <sup>ab</sup> | 3.93 <sup>a-c</sup> | 3.61              | 3.47 <sup>ab</sup>   | 3.82 <sup>b-e</sup>     | 3.82 <sup>ab</sup>      | 4.74 <sup>ab</sup>     | 4.71 <sup>a-c</sup>    | 2.01 <sup>ab</sup>       | 2.84               | 2.43                | 3.33                | 2.06 <sup>ab</sup>  |
| 5010      | 39          | x    | 3.64 <sup>ab</sup> | 3.67 <sup>a-c</sup> | 3.67              | 2.87 <sup>a-c</sup>  | 3.64 <sup>c-e</sup>     | 2.80 <sup>b-d</sup>     | 4.52 <sup>ab</sup>     | 4.17 <sup>a-d</sup>    | 1.30 <sup>ab</sup>       | 1.20               | 1.90                | 1.36                | 1.60 <sup>ab</sup>  |
| 5015      | 40          |      | 3.59 <sup>ab</sup> | 4.94 <sup>ab</sup>  | 4.09              | 2.82 <sup>a-c</sup>  | --                      | --                      | --                     | --                     | 1.42 <sup>ab</sup>       | 2.60               | 1.78                | 1.90                | 2.28 <sup>ab</sup>  |
| 5055      | 41          | x    | 3.31 <sup>ab</sup> | 4.03 <sup>a-c</sup> | 3.74              | 3.21 <sup>a-c</sup>  | 3.78 <sup>b-e</sup>     | 2.83 <sup>b-d</sup>     | 4.46 <sup>ab</sup>     | 3.96 <sup>b-d</sup>    | 1.64 <sup>ab</sup>       | 2.43               | 1.03                | 2.96                | 2.17 <sup>ab</sup>  |
| 4056      | 13          | x    | 3.52 <sup>ab</sup> | 4.43 <sup>a-c</sup> | 3.88              | 3.74 <sup>a</sup>    | 4.42 <sup>a</sup>       | 4.02 <sup>a</sup>       | 4.98 <sup>a</sup>      | 4.95 <sup>a</sup>      | 1.97 <sup>ab</sup>       | 2.40               | 1.89                | 2.75                | 2.85 <sup>ab</sup>  |
| 4558      | 23          |      | 3.37 <sup>ab</sup> | 4.33 <sup>a-c</sup> | 3.91              | 3.38 <sup>ab</sup>   | --                      | --                      | --                     | --                     | 1.88 <sup>ab</sup>       | 2.32               | 3.82                | 2.36                | 1.08 <sup>ab</sup>  |
| 4018      | 12          | x    | 3.50 <sup>ab</sup> | 4.65 <sup>a-c</sup> | 4.14              | 2.83 <sup>a-c</sup>  | 3.80 <sup>b-e</sup>     | 2.95 <sup>a-d</sup>     | 4.41 <sup>ab</sup>     | 4.25 <sup>a-d</sup>    | 1.79 <sup>ab</sup>       | 2.26               | 0.94                | 4.19                | 2.29 <sup>ab</sup>  |
| 4861      | 29          |      | 3.12 <sup>ab</sup> | 3.46 <sup>a-c</sup> | 4.24              | 2.98 <sup>a-c</sup>  | --                      | --                      | --                     | --                     | 1.80 <sup>ab</sup>       | 1.64               | 1.48                | 1.89                | 2.48 <sup>ab</sup>  |
| 5162      | 43          | x    | 3.67 <sup>ab</sup> | 4.09 <sup>a-c</sup> | 3.49              | 3.41 <sup>ab</sup>   | 4.32 <sup>ab</sup>      | 3.65 <sup>a-c</sup>     | 4.71 <sup>ab</sup>     | 4.52 <sup>a-d</sup>    | 1.94 <sup>ab</sup>       | 2.51               | 2.53                | 1.47                | 2.45 <sup>ab</sup>  |
| 7826      | 115         |      | 3.25 <sup>ab</sup> | 4.05 <sup>a-c</sup> | 3.67              | 3.52 <sup>ab</sup>   | --                      | --                      | --                     | --                     | 1.28 <sup>ab</sup>       | 2.19               | 0.83                | 1.87                | 2.95 <sup>ab</sup>  |
| 4182      | 15          | x    | 3.61 <sup>ab</sup> | 4.06 <sup>a-c</sup> | 4.13              | 2.93 <sup>a-c</sup>  | 3.78 <sup>b-e</sup>     | 2.83 <sup>b-d</sup>     | 4.40 <sup>ab</sup>     | 4.15 <sup>a-d</sup>    | 2.28 <sup>ab</sup>       | 2.31               | 2.18                | 3.13                | 1.65 <sup>ab</sup>  |
| 5186      | 44          |      | 3.59 <sup>ab</sup> | 4.51 <sup>a-c</sup> | 4.19              | 3.22 <sup>a-c</sup>  | --                      | --                      | --                     | --                     | 2.07 <sup>ab</sup>       | 2.80               | 1.64                | 3.61                | 1.79 <sup>ab</sup>  |
| 8032      | 120         | x    | 3.11 <sup>ab</sup> | 3.77 <sup>a-c</sup> | 3.05              | 3.00 <sup>a-c</sup>  | 3.60 <sup>c-e</sup>     | 2.05 <sup>de</sup>      | 4.29 <sup>ab</sup>     | 3.88 <sup>b-d</sup>    | 1.54 <sup>ab</sup>       | 1.85               | 2.69                | 1.87                | 2.33 <sup>ab</sup>  |
| 4442      | 21          | x    | 3.71 <sup>ab</sup> | 4.51 <sup>a-c</sup> | 3.8               | 3.18 <sup>a-c</sup>  | 3.76 <sup>b-e</sup>     | 3.07 <sup>a-d</sup>     | 4.60 <sup>ab</sup>     | 4.43 <sup>a-d</sup>    | 2.21 <sup>ab</sup>       | 2.22               | 1.14                | 3.05                | 3.20 <sup>ab</sup>  |
| 4922      | 32          |      | 3.67 <sup>ab</sup> | 4.59 <sup>a-c</sup> | 3.63              | 2.71 <sup>bc</sup>   | --                      | --                      | --                     | --                     | 2.04 <sup>ab</sup>       | 2.25               | 1.94                | 2.62                | 2.22 <sup>ab</sup>  |
| 3688      | 1           | x    | 3.14 <sup>ab</sup> | 4.15 <sup>a-c</sup> | 4.46              | 2.75 <sup>a-c</sup>  | 3.38 <sup>c-e</sup>     | 2.73 <sup>b-d</sup>     | 4.33 <sup>ab</sup>     | 4.02 <sup>a-d</sup>    | <b>1.25<sup>bc</sup></b> | 2.60               | 2.88                | 2.32                | 3.08 <sup>ab</sup>  |

Table S3, cont.

| Line Name               | Genotype ID | 2010 | Means Separation   |                     |                   |                      |                         |                         |                        |                         |                    |                    |                     |                     |                     |
|-------------------------|-------------|------|--------------------|---------------------|-------------------|----------------------|-------------------------|-------------------------|------------------------|-------------------------|--------------------|--------------------|---------------------|---------------------|---------------------|
|                         |             |      | GC_120 p7629 LEAF  | GC_120 p10353 LEAF  | GC_120 Sal10 LEAF | 09FD_120 Loc1&2 STEM | 10FD-early_83 Loc1 STEM | 10FD-early_83 Loc2 STEM | 10FD-late_83 Loc1 STEM | 10FD-late_83 Loc2 STEM  | GC_120 p7629 STEM  | GC_120 p10353 STEM | GC-1_120 Sal10 STEM | GC-2_120 Sal10 STEM | GC-3_120 Sal10 STEM |
| 4106                    | 14          | x    | 2.72 <sup>b</sup>  | 3.18 <sup>a-c</sup> | 3.00              | 2.73 <sup>a-c</sup>  | 3.62 <sup>c-e</sup>     | 2.55 <sup>cd</sup>      | 4.35 <sup>ab</sup>     | 3.93 <sup>b-d</sup>     | 1.29 <sup>bc</sup> | 1.33               | 1.88                | 2.54                | 1.44 <sup>ab</sup>  |
| 4925                    | 33          | x    | 3.44 <sup>ab</sup> | 4.34 <sup>a-c</sup> | 4.06              | 2.72 <sup>a-c</sup>  | 3.64 <sup>c-e</sup>     | 2.95 <sup>a-d</sup>     | 4.71 <sup>ab</sup>     | 4.46 <sup>a-d</sup>     | 1.84 <sup>ab</sup> | 2.45               | 1.92                | 3.83                | 1.66 <sup>ab</sup>  |
| 4498                    | 22          | x    | 2.99 <sup>ab</sup> | 3.16 <sup>a-c</sup> | 3.38              | 3.16 <sup>a-c</sup>  | 3.72 <sup>c-e</sup>     | 2.17 <sup>de</sup>      | 4.58 <sup>ab</sup>     | 4.02 <sup>a-d</sup>     | 1.46 <sup>ab</sup> | 1.72               | 0.62                | 2.50                | 1.62 <sup>ab</sup>  |
| 3723                    | 2           | x    | 3.44 <sup>ab</sup> | 4.53 <sup>a-c</sup> | 3.85              | 2.87 <sup>a-c</sup>  | 3.58 <sup>c-e</sup>     | 2.32 <sup>de</sup>      | 4.21 <sup>ab</sup>     | 3.73 <sup>d</sup>       | 1.78 <sup>ab</sup> | 2.70               | <b>0.54</b>         | 3.11                | 2.20 <sup>ab</sup>  |
| 4794                    | 27          | x    | 3.18 <sup>ab</sup> | 4.13 <sup>a-c</sup> | 4.49              | 2.84 <sup>a-c</sup>  | 3.39 <sup>c-e</sup>     | 2.42 <sup>de</sup>      | 4.52 <sup>ab</sup>     | 4.37 <sup>a-d</sup>     | 1.43 <sup>ab</sup> | 2.67               | 1.69                | 3.36                | 2.73 <sup>ab</sup>  |
| 4802                    | 28          | x    | 3.66 <sup>ab</sup> | 3.95 <sup>a-c</sup> | 4.52              | 3.37 <sup>ab</sup>   | 3.90 <sup>a-d</sup>     | 2.95 <sup>a-d</sup>     | 4.63 <sup>ab</sup>     | 4.36 <sup>a-d</sup>     | 2.34 <sup>ab</sup> | 2.59               | 1.92                | 3.12                | 3.71 <sup>a</sup>   |
| 5245                    | 46          | x    | 3.54 <sup>ab</sup> | 4.47 <sup>a-c</sup> | 3.83              | 2.95 <sup>a-c</sup>  | 3.48 <sup>c-e</sup>     | 2.37 <sup>de</sup>      | 4.27 <sup>ab</sup>     | 3.89 <sup>b-d</sup>     | 2.17 <sup>ab</sup> | 2.07               | 2.57                | 2.06                | 1.97 <sup>ab</sup>  |
| 3740                    | 3           | x    | 3.58 <sup>ab</sup> | 4.00 <sup>a-c</sup> | 3.77              | 3.00 <sup>a-c</sup>  | 3.44 <sup>c-e</sup>     | 2.08 <sup>de</sup>      | 4.43 <sup>ab</sup>     | <b>3.70<sup>d</sup></b> | 2.05 <sup>ab</sup> | 2.11               | 1.94                | 2.59                | 2.85 <sup>ab</sup>  |
| 5285                    | 47          | x    | 3.39 <sup>ab</sup> | 3.99 <sup>a-c</sup> | 4.23              | 3.27 <sup>a-c</sup>  | 3.84 <sup>b-d</sup>     | 3.15 <sup>a-d</sup>     | 4.60 <sup>ab</sup>     | 4.32 <sup>a-d</sup>     | 2.31 <sup>ab</sup> | 2.43               | 1.73                | 2.89                | 3.12 <sup>ab</sup>  |
| 3765                    | 4           | x    | 3.42 <sup>ab</sup> | 4.08 <sup>a-c</sup> | 4.16              | 3.09 <sup>a-c</sup>  | 3.76 <sup>b-e</sup>     | 3.09 <sup>a-d</sup>     | 4.52 <sup>ab</sup>     | 4.12 <sup>a-d</sup>     | 2.05 <sup>ab</sup> | 2.20               | 3.35                | 3.11                | 0.72 <sup>b</sup>   |
| 4897                    | 31          | x    | 3.42 <sup>ab</sup> | 3.80 <sup>a-c</sup> | 4.15              | 3.17 <sup>a-c</sup>  | 3.74 <sup>c-e</sup>     | 3.23 <sup>a-d</sup>     | 4.32 <sup>ab</sup>     | 3.98 <sup>b-d</sup>     | 1.98 <sup>ab</sup> | 2.12               | 1.45                | 2.18                | 2.35 <sup>ab</sup>  |
| 5362                    | 49          | x    | 3.70 <sup>ab</sup> | 4.02 <sup>a-c</sup> | 3.86              | 3.27 <sup>a-c</sup>  | 3.66 <sup>c-e</sup>     | 2.93 <sup>a-d</sup>     | 4.43 <sup>ab</sup>     | 3.88 <sup>b-d</sup>     | 2.31 <sup>ab</sup> | 2.12               | 2.42                | 3.60                | 1.03 <sup>b</sup>   |
| 4877                    | 30          | x    | 3.82 <sup>ab</sup> | 4.12 <sup>a-c</sup> | 3.74              | 2.93 <sup>a-c</sup>  | 3.79 <sup>b-e</sup>     | 2.53 <sup>cd</sup>      | 4.78 <sup>ab</sup>     | 4.53 <sup>a-d</sup>     | 2.05 <sup>ab</sup> | 2.46               | 2.58                | 2.55                | 1.20 <sup>ab</sup>  |
| 8009                    | 119         | x    | 3.28 <sup>ab</sup> | 4.55 <sup>a-c</sup> | 3.72              | 3.25 <sup>a-c</sup>  | 3.64 <sup>c-e</sup>     | 2.78 <sup>b-d</sup>     | 4.49 <sup>ab</sup>     | 4.27 <sup>a-d</sup>     | 1.55 <sup>ab</sup> | 2.94               | 1.47                | 3.62                | 2.14 <sup>ab</sup>  |
| 3814                    | 5           |      | 3.53 <sup>ab</sup> | 3.79 <sup>a-c</sup> | 4.31              | 2.97 <sup>a-c</sup>  | --                      | --                      | --                     | --                      | 1.76 <sup>ab</sup> | 1.54               | 1.93                | 3.18                | 1.81 <sup>ab</sup>  |
| <b>Means Separation</b> |             |      | *                  | *                   | ns                | *                    | *                       | *                       | *                      | *                       | *                  | ns                 | ns                  | ns                  | *                   |

<sup>a</sup> In Proc MIXED in SAS, means separation are calculated using both the difference between means and the number of replications for each entry. Therefore, letter rankings are not always contiguous.

A double dash (--) indicates that the line was not included in the experiment.

An asterisk (\*) indicates significance at  $P \leq 0.05$  and "ns" indicates not significant.
